# Supplementary material for: Transcriptional Landscape of Vero E6 Cells during Early Swine Acute Diarrhea Syndrome Coronavirus Infection
Source: PubMed Central journal article supplement (PMC8070899; doi:10.3390/v13040674), 2021-04-14
Supplement: viruses-13-00674-s001.pdf [file viruses-13-00674-s001.pdf]

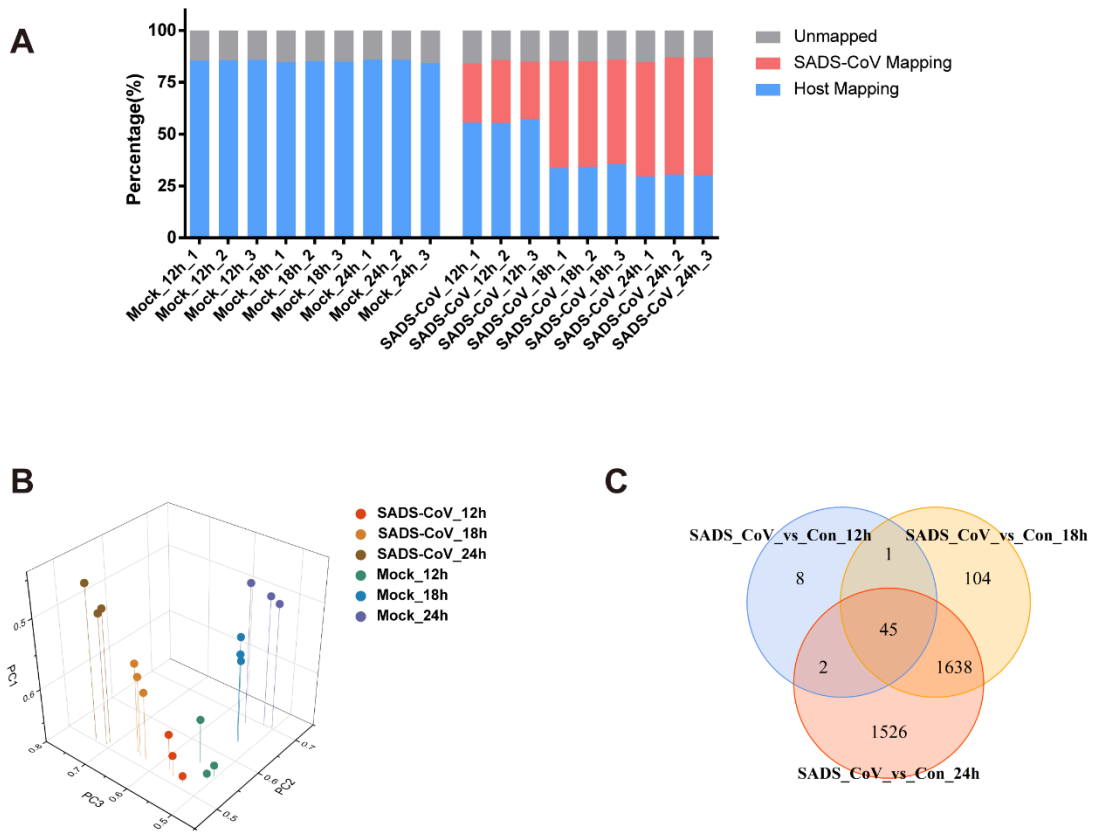

**Figure S1.** Basic information of RNA-seq results. (A) Bar plot of reads component for each sample. (B) Dot plot shows the principal component analysis (PCA) of each sample. (C) Venn diagram of DEGs for three time points, the overlap part of the circles represents common differentially expressed genes between combinations.

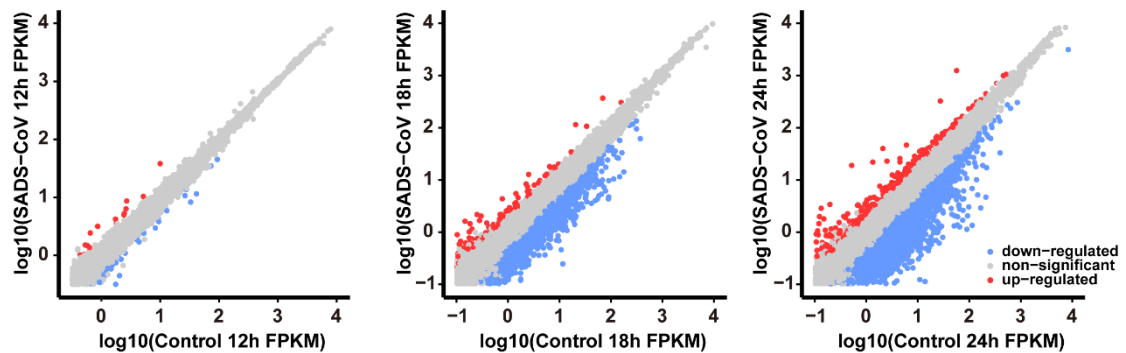

**Figure S2.** Scatter plot of DEGs for each time point. The X and Y axes represent the logarithmic value of gene expression. Red represents up-regulated DEG, blue represents down-regulated DEG, and gray represents non-DEG.

**Table S1.** Primers used for quantitative real-time PCR analysis of DEGs.

| Gene  | Primer  | Sequence                        |
|-------|---------|---------------------------------|
| FOXO1 | Forward | 5'-CTACGAGTGGATGGTCAAGAGC-3'    |
|       | Reverse | 5'-CCAGTTCCTTCATTCTGCACACG-3'   |
| IRS2  | Forward | 5'-GACGTCCGGCATCAGAGAAA-3'      |
|       | Reverse | 5'-TCCACGGCTAATCGTCACAG-3'      |
| IRS1  | Forward | 5'-CACAACCAGGACCTCACACC-3'      |
|       | Reverse | 5'-CTTGGCACGATAGAGAGCGT-3'      |
| IL6   | Forward | 5'-AGGATACTACTCCCAACAGACCT-3'   |
|       | Reverse | 5'-CAAGTGCATCATCGTTGTTTCATAC-3' |
| CCL5  | Forward | 5'-TCACGTTGTACGCAGCTACC-3'      |
|       | Reverse | 5'-CAGTCCTCTTACAGCCTTTGG-3'     |
| BMP7  | Forward | 5'-CTGTGCAGCCGCAGTGCCTACC-3'    |
|       | Reverse | 5'-ATCCCTCCCCACCCACCATCT-3'     |
| BCL2  | Forward | 5'-CTCTCCCCCTCGACTTCTGA-3'      |
|       | Reverse | 5'-AGTCACGCGGAACACTTGAT-3'      |
| FGF7  | Forward | 5'-CTGTCGAACACAGTGGTACCTG-3'    |
|       | Reverse | 5'-CCAAGTCCACTGTCCTGATTTTC-3'   |
| GAPDH | Forward | 5'-GGGAGCCAAAAGGGTCATCA-3'      |
|       | Reverse | 5'-CGTGGACTGTGGTCATGAGT-3'      |

**Supplementary material: Differentially expressed genes**

| Gene Symbol  | log <sub>2</sub> (SADS-CoV_12h/<br>Control_12h) | Qvalue (SADS-CoV_12h/<br>Control_12h) |
|--------------|-------------------------------------------------|---------------------------------------|
| PTGER4       | -1.03693                                        | 6.79E-04                              |
| TMEM72       | -3.08132                                        | 3.66E-04                              |
| IFIT2        | -1.02918                                        | 2.11E-07                              |
| FRAT2        | -1.09282                                        | 4.66E-05                              |
| GPR155       | 1.006876                                        | 3.67E-29                              |
| PTHLH        | -1.19751                                        | 6.56E-05                              |
| TPM2         | 1.067257                                        | 4.44E-14                              |
| GAS1         | -1.29488                                        | 1.55E-44                              |
| CYP26B1      | 2.495422                                        | 1.57E-28                              |
| ZFP36L2      | -1.02052                                        | 4.82E-10                              |
| RHOB         | -1.03925                                        | 6.54E-255                             |
| ID2          | -1.28355                                        | 1.29E-55                              |
| LOC103222352 | -2.03652                                        | 1.52E-126                             |
| SMAD7        | -1.07002                                        | 3.57E-35                              |
| ASXL3        | -1.06278                                        | 2.74E-10                              |

|              |          |           |
|--------------|----------|-----------|
| ADORA2A      | 1.046097 | 1.81E-15  |
| S100A8       | 2.047963 | 2.56E-04  |
| DMRTA2       | 4.147499 | 8.75E-04  |
| SLFNL1       | 2.093051 | 3.71E-04  |
| KLHDC7A      | -1.11579 | 1.91E-42  |
| RHBDL1       | 2.288361 | 4.67E-07  |
| TMEM60       | -1.05044 | 4.33E-04  |
| AMT          | 1.23133  | 1.53E-04  |
| GPHB5        | 5.147499 | 2.31E-07  |
| LOC103229154 | -4.49877 | 4.50E-30  |
| DNAH3        | -1.45983 | 3.04E-04  |
| ZNF670       | -1.27877 | 1.58E-04  |
| LOC103232367 | 7.601016 | 7.85E-18  |
| LOC103233166 | 1.48547  | 1.41E-05  |
| ZNF555       | -1.26431 | 3.41E-07  |
| ZBTB3        | -1.15206 | 1.62E-05  |
| JUNB         | -1.05293 | 2.68E-152 |
| SERTAD3      | -1.12179 | 1.42E-22  |
| TMEM190      | 1.138729 | 3.54E-05  |
| CXCL1        | 1.941048 | 1.17E-11  |
| PIGY         | -1.77229 | 5.78E-133 |
| PYURF        | 1.884112 | 4.02E-136 |
| TIFA         | -1.00972 | 3.80E-04  |
| LOC103237505 | 3.147499 | 1.89E-04  |
| SKIDA1       | -1.29062 | 9.65E-06  |
| OTUD1        | -1.37998 | 7.77E-07  |
| LOC103238388 | -2.11634 | 1.61E-07  |
| WSCD2        | -1.13454 | 1.22E-04  |
| CD24         | -1.04833 | 6.74E-208 |
| SCARF1       | 1.267631 | 4.67E-26  |
| LOC103242710 | 1.734597 | 3.13E-18  |
| LOC103243474 | 1.431292 | 5.42E-04  |
| SOCS3        | -1.48097 | 2.69E-46  |
| PCK1         | -1.271   | 8.24E-07  |
| CASS4        | -2.86373 | 3.15E-06  |
| ADRB2        | -1.00985 | 7.77E-61  |
| ZNF879       | -1.0489  | 4.93E-06  |
| SPTBN5       | 1.006636 | 6.42E-06  |
| CHAC1        | -1.33327 | 1.79E-11  |
| LOC103248152 | -2.43139 | 4.89E-04  |

---

| Gene Symbol | log2(SADS-CoV_18h/Control_18h) | Qvalue(SADS-CoV_18h/Control_18h) |
|-------------|--------------------------------|----------------------------------|
| USPL1       | -1.0255                        | 1.14E-33                         |
| STARD13     | -1.24947                       | 2.69E-164                        |
| SERTM1      | -1.31557                       | 7.08E-06                         |
| FOXO1       | -2.06866                       | 1.54E-37                         |
| KBTBD6      | -1.75047                       | 1.34E-12                         |
| KBTBD7      | -2.44597                       | 1.00E-17                         |
| TSC22D1     | -1.94803                       | 4.39E-201                        |
| COG3        | -1.03151                       | 1.80E-22                         |
| LRCH1       | -1.04443                       | 2.49E-18                         |
| HTR2A       | -1.17653                       | 1.20E-12                         |
| MED4        | -1.17165                       | 2.80E-25                         |
| TRIM13      | -1.93221                       | 1.44E-12                         |
| INTS6       | -1.00863                       | 9.49E-24                         |
| ALG11       | -1.41085                       | 5.08E-35                         |
| THSD1       | -1.35999                       | 2.29E-21                         |
| FLRT3       | -2.36106                       | 0                                |
| DACH1       | -1.52162                       | 1.57E-10                         |
| BORA        | -1.26912                       | 5.33E-51                         |
| KLF5        | -2.72157                       | 1.12E-157                        |
| RNF219      | -1.99898                       | 1.44E-33                         |
| SPRY2       | -3.28436                       | 1.70E-175                        |
| SLITRK5     | -1.66132                       | 8.30E-172                        |
| ZIC5        | -1.28693                       | 5.98E-10                         |
| ZIC2        | -2.99543                       | 3.44E-111                        |
| EFNB2       | -1.71327                       | 4.71E-59                         |
| ABHD13      | -1.33291                       | 9.37E-30                         |
| IRS2        | -2.21852                       | 4.35E-108                        |
| ING1        | -2.3861                        | 3.35E-49                         |
| ZNF133      | -1.91312                       | 5.71E-30                         |
| CHAMP1      | -2.05402                       | 6.57E-122                        |
| LRRRC14B    | -2.5191                        | 2.73E-05                         |
| CCDC127     | -1.67648                       | 4.25E-27                         |
| AHRR        | -1.26857                       | 1.01E-65                         |
| SLC6A18     | -2.73209                       | 2.02E-06                         |
| CMBL        | 3.72907                        | 7.05E-05                         |
| ANKRD33B    | -1.38594                       | 6.47E-25                         |
| ZNF622      | -1.03769                       | 1.30E-27                         |
| RIN2        | -1.55024                       | 1.35E-29                         |
| GOLPH3      | -1.19179                       | 8.37E-151                        |
| GDNF        | -1.88622                       | 1.98E-31                         |
| PTGER4      | -2.0072                        | 2.60E-06                         |

|              |          |           |
|--------------|----------|-----------|
| CARD6        | -1.16088 | 4.03E-17  |
| NIM1K        | -1.78472 | 7.28E-22  |
| HMGCS1       | -2.17836 | 0         |
| C4H5orf34    | -1.02532 | 9.10E-26  |
| LOC103215245 | -1.65634 | 2.60E-04  |
| ZNF596       | -1.54767 | 1.44E-10  |
| KBTBD11      | -1.60264 | 1.50E-51  |
| LOC103215277 | -1.55152 | 1.19E-05  |
| KMT5B        | -1.70496 | 3.47E-79  |
| PPP1R3B      | -3.50954 | 2.14E-166 |
| CLDN23       | -1.67211 | 4.36E-07  |
| PRAG1        | -2.39187 | 4.64E-18  |
| LONRF1       | -1.7769  | 5.99E-113 |
| NXT1         | -1.33942 | 1.15E-16  |
| C8H8orf58    | -2.2699  | 2.27E-53  |
| TNFRSF10D    | -1.22959 | 2.64E-10  |
| NKX3-1       | -1.31706 | 2.67E-17  |
| GNRH1        | -1.98702 | 3.60E-06  |
| TRIM35       | -1.09192 | 8.83E-24  |
| PURG         | -3.01387 | 2.97E-08  |
| FUT10        | -1.46597 | 3.90E-30  |
| RNF122       | -1.35512 | 4.73E-13  |
| BRF2         | -1.4921  | 2.56E-27  |
| BAG4         | -1.16009 | 2.16E-31  |
| ZNF343       | -1.09239 | 1.54E-26  |
| KAT6A        | -1.60999 | 8.22E-116 |
| STK35        | -1.6521  | 0         |
| DLC1         | -1.97408 | 4.93E-86  |
| TMEM72       | -2.31706 | 1.64E-05  |
| DEPP1        | -4.24214 | 0         |
| ZNF22        | -1.36656 | 8.01E-24  |
| LOC103215804 | 1.229838 | 4.31E-05  |
| LOC103215829 | -1.52074 | 1.59E-44  |
| ZNF488       | -1.66255 | 1.26E-05  |
| FAM110A      | -2.58949 | 2.61E-16  |
| ZNF503       | -3.38714 | 2.94E-90  |
| SAMD8        | -1.10523 | 6.89E-57  |
| KAT6B        | -1.00209 | 9.21E-14  |
| TBC1D20      | -1.44641 | 3.89E-60  |
| DDIT4        | -3.60358 | 0         |
| CHST3        | -1.56111 | 7.77E-09  |
| ADAMTS14     | 1.146782 | 9.52E-05  |
| TET1         | -2.68903 | 1.83E-04  |
| SIRT1        | -2.24347 | 6.27E-71  |

|              |          |           |
|--------------|----------|-----------|
| JMJD1C       | -1.10599 | 9.37E-69  |
| NRBF2        | -1.48354 | 3.15E-58  |
| ADO          | -1.00542 | 7.21E-40  |
| ARID5B       | -2.39039 | 0         |
| IPMK         | -1.49656 | 3.07E-61  |
| MTRNR2L5     | 1.946553 | 6.78E-30  |
| CSTF2T       | -1.6706  | 6.27E-55  |
| IFIT2        | -2.36825 | 1.78E-23  |
| IFIT5        | -1.05556 | 2.47E-04  |
| HTR7         | 1.23607  | 2.01E-06  |
| ANKRD1       | -1.68903 | 7.34E-05  |
| PPP1R3C      | -3.80272 | 4.62E-256 |
| HHEX         | -2.14963 | 2.13E-16  |
| LOC103216270 | 1.852868 | 4.40E-05  |
| LOC103216306 | -1.37393 | 1.39E-05  |
| CCNJ         | -1.12726 | 1.73E-23  |
| ZNF518A      | -1.28526 | 1.28E-56  |
| FRAT1        | -2.41017 | 2.80E-07  |
| FRAT2        | -2.20757 | 9.37E-12  |
| DNMBP        | -1.37445 | 1.96E-49  |
| SEMA4G       | 1.203366 | 3.06E-08  |
| HPS6         | -2.67197 | 1.04E-82  |
| PPRC1        | -1.73565 | 6.21E-86  |
| C9H10orf95   | -3.93003 | 1.16E-06  |
| TAF5         | -1.74897 | 7.85E-22  |
| TGIF2        | -1.28022 | 6.24E-21  |
| ITPRIP       | -2.11176 | 1.13E-15  |
| DUSP5        | -2.70183 | 1.35E-59  |
| RBM20        | -1.0852  | 1.61E-05  |
| ADRA2A       | 4.355369 | 3.65E-04  |
| SOGA1        | -1.57592 | 3.32E-52  |
| CASP7        | -1.39303 | 1.90E-39  |
| ADRB1        | -4.73209 | 8.92E-12  |
| FAM160B1     | -2.07307 | 8.05E-64  |
| EMX2         | -1.97608 | 3.25E-109 |
| BAG3         | -1.51008 | 1.80E-107 |
| IKZF5        | -1.16546 | 1.01E-22  |
| ZRANB1       | -1.32712 | 7.64E-59  |
| SON          | -1.1287  | 0         |
| TCF7L2       | -1.13577 | 5.20E-17  |
| DNAJC28      | -1.46132 | 2.66E-08  |
| ABRAXAS2     | -1.05741 | 5.99E-25  |
| SFT2D3       | -2.05967 | 2.59E-20  |
| MAP3K2       | -1.21152 | 6.33E-73  |

|              |          |           |
|--------------|----------|-----------|
| TMEM177      | -1.91234 | 4.32E-81  |
| TMEM37       | -1.62005 | 7.71E-17  |
| INSIG2       | -1.01206 | 8.77E-29  |
| LOC103216964 | -1.31923 | 2.27E-04  |
| CCNT2        | -1.04712 | 3.39E-44  |
| ACVR2A       | -1.18267 | 1.94E-25  |
| EPC2         | -1.09169 | 3.44E-30  |
| LYPD6        | -1.03695 | 4.63E-05  |
| RND3         | -2.11904 | 1.20E-106 |
| SCAF4        | -1.47752 | 1.13E-92  |
| BAZ2B        | -1.0978  | 7.00E-32  |
| 7-Mar        | -1.13318 | 1.01E-96  |
| FIGN         | -1.54029 | 3.06E-33  |
| SP3          | -1.03748 | 9.66E-93  |
| GPR155       | 1.550185 | 9.89E-63  |
| HOXD13       | -1.19572 | 6.66E-17  |
| HOXD9        | -1.05636 | 2.58E-17  |
| HOXD3        | -1.22959 | 1.64E-07  |
| HOXD4        | -1.44337 | 5.87E-24  |
| NFE2L2       | -1.33446 | 6.90E-199 |
| LOC103217397 | -2.79446 | 4.14E-20  |
| LOC103217405 | -1.9128  | 3.67E-18  |
| PLEKHA3      | -1.28574 | 4.01E-11  |
| BACH1        | -2.40372 | 1.88E-110 |
| DUSP19       | -1.61864 | 4.95E-04  |
| MARS2        | -1.19337 | 3.52E-25  |
| C10H2orf69   | -1.99854 | 7.09E-44  |
| CLK1         | -1.78778 | 1.12E-80  |
| FZD7         | -1.19823 | 5.13E-26  |
| FAM117B      | -1.15623 | 3.31E-14  |
| RAPH1        | -1.06994 | 7.74E-12  |
| ADAMTS1      | -1.85054 | 0         |
| INO80D       | -1.33604 | 1.69E-20  |
| FZD5         | -1.12268 | 2.40E-14  |
| PIKFYVE      | -1.1674  | 8.14E-46  |
| IKZF2        | -1.34889 | 7.00E-09  |
| RNF25        | -1.3979  | 1.89E-20  |
| CDK5R2       | -2.25344 | 2.36E-11  |
| KCNE4        | -2.30325 | 3.30E-39  |
| MRPL44       | -1.30078 | 2.04E-50  |
| IRS1         | -1.51647 | 4.32E-10  |
| HTR2B        | -1.91765 | 5.33E-13  |
| B3GNT7       | -2.68752 | 2.26E-99  |
| TIGD1        | -1.83226 | 1.21E-11  |

|              |          |           |
|--------------|----------|-----------|
| GIGYF2       | -1.0705  | 2.88E-53  |
| HJURP        | -1.52107 | 1.73E-85  |
| LOC103218119 | -2.06417 | 2.72E-33  |
| C2H21orf91   | -1.21232 | 5.92E-04  |
| ARL4C        | -1.80481 | 4.57E-280 |
| GBX2         | -1.46566 | 4.94E-06  |
| KLHL30       | -1.22959 | 1.04E-04  |
| PER2         | -1.24157 | 1.84E-05  |
| NRIP1        | -1.44943 | 1.64E-183 |
| LOC103218231 | -3.81576 | 3.91E-06  |
| MTERF4       | -1.47686 | 9.31E-40  |
| LOC103218293 | -1.69526 | 2.06E-04  |
| LOC103218361 | -1.94873 | 3.29E-04  |
| FBXL14       | -1.44447 | 4.45E-36  |
| DCP1B        | -1.58819 | 9.67E-83  |
| PLEKHG6      | -1.09089 | 5.04E-46  |
| LPAR5        | -1.3834  | 1.55E-12  |
| RUNX1        | -1.41886 | 9.14E-99  |
| LRP6         | -1.20845 | 8.77E-53  |
| DUSP16       | -1.20191 | 2.43E-70  |
| CDKN1B       | -2.95301 | 2.30E-241 |
| GPRC5A       | -1.98549 | 1.65E-39  |
| ATF7IP       | -1.24934 | 1.15E-30  |
| DYRK1A       | -1.52961 | 5.31E-97  |
| KCNJ8        | -1.85739 | 6.90E-223 |
| KRAS         | -1.0912  | 1.28E-35  |
| RASSF8       | -1.03377 | 6.64E-99  |
| PTHLH        | -2.22959 | 4.73E-12  |
| RESF1        | -1.97434 | 1.63E-27  |
| ETS2         | -1.33495 | 2.16E-64  |
| MEGF9        | -2.31476 | 7.99E-83  |
| TRIM32       | -2.31488 | 5.11E-116 |
| HDHD3        | -2.18446 | 2.49E-44  |
| ZFP37        | -2.82454 | 8.36E-17  |
| UGCG         | -1.26836 | 0         |
| PTPN3        | -1.36126 | 1.49E-186 |
| KLF4         | -3.34507 | 1.10E-07  |
| ZNF189       | -1.91472 | 1.82E-23  |
| MSANTD3      | -1.1448  | 1.59E-40  |
| ALG2         | -1.28601 | 6.51E-68  |
| SHB          | -1.27885 | 6.47E-164 |
| ZBTB5        | -1.99153 | 3.94E-47  |
| GNE          | -1.42278 | 3.04E-86  |
| HRCT1        | -2.1249  | 6.93E-23  |



|              |          |           |
|--------------|----------|-----------|
| RIPK4        | -2.39952 | 8.94E-16  |
| TPM2         | 1.506194 | 6.38E-35  |
| FAM214B      | -1.20389 | 4.65E-49  |
| DNAJB5       | -1.47245 | 1.73E-54  |
| CCL27        | 1.376742 | 1.73E-08  |
| ZBTB21       | -1.39033 | 1.41E-41  |
| TOPORS       | -1.81863 | 3.16E-91  |
| ACER2        | -1.10406 | 2.28E-07  |
| RRAGA        | -1.36777 | 2.40E-145 |
| RANBP6       | -2.18926 | 5.87E-127 |
| KIAA2026     | -1.46986 | 1.35E-50  |
| LOC103219486 | -1.16013 | 2.39E-08  |
| CDC37L1      | -1.19553 | 4.31E-21  |
| PLPP6        | -1.94949 | 5.11E-48  |
| VLDLR        | -1.85022 | 3.65E-64  |
| LOC103219534 | -2.16819 | 3.67E-12  |
| FAM122A      | -1.77189 | 8.65E-34  |
| SIK1         | -3.24054 | 5.37E-279 |
| KLF9         | -2.17388 | 1.06E-31  |
| ABHD17B      | -2.07691 | 5.12E-33  |
| ZFAND5       | -1.82931 | 0         |
| RMI1         | -1.27248 | 4.51E-28  |
| GAS1         | -3.80594 | 2.34E-141 |
| SHC3         | 1.075261 | 3.37E-05  |
| NFIL3        | -2.93862 | 1.55E-162 |
| ZNF484       | -1.92147 | 9.77E-10  |
| ZNF658       | -1.44319 | 5.03E-16  |
| ZNF367       | -2.34298 | 1.19E-61  |
| PTCH1        | -2.56065 | 5.40E-32  |
| LOC103219907 | -2.03695 | 9.64E-06  |
| ZNF782       | -1.01809 | 1.40E-05  |
| KDM3A        | -1.18645 | 3.78E-82  |
| DOK1         | -1.07553 | 2.82E-21  |
| PCGF1        | -1.34507 | 3.19E-19  |
| TET3         | -1.32646 | 6.68E-29  |
| CYP26B1      | 3.446517 | 3.00E-66  |
| MXD1         | -2.25806 | 1.73E-48  |
| PLEK         | 1.009872 | 9.85E-07  |
| ETAA1        | -1.25934 | 8.30E-43  |
| MEIS1        | -1.06965 | 3.26E-05  |
| SPRED2       | -1.09683 | 3.33E-82  |
| SERTAD2      | -2.34659 | 8.68E-253 |
| AFTPH        | -1.05255 | 1.53E-38  |
| PELI1        | -1.17431 | 1.39E-104 |

|              |          |           |
|--------------|----------|-----------|
| LOC103220168 | -1.62398 | 4.72E-06  |
| SLC19A1      | -1.09601 | 4.72E-09  |
| OTX1         | -2.28849 | 1.70E-22  |
| B3GNT2       | -1.66228 | 3.12E-74  |
| REL          | -1.37735 | 6.92E-06  |
| PAPOLG       | -1.66093 | 5.37E-36  |
| BCL11A       | -1.67438 | 1.21E-06  |
| STON1        | -1.2228  | 4.59E-31  |
| FOXN2        | -1.11983 | 1.18E-16  |
| SOCS5        | -1.79758 | 1.46E-64  |
| PRKCE        | 1.309272 | 1.33E-16  |
| SIX2         | -1.96656 | 6.95E-04  |
| SIX3         | -2.73209 | 3.29E-08  |
| C1GALT1C1L   | -1.47195 | 8.79E-15  |
| ZFP36L2      | -3.2846  | 9.09E-48  |
| PKDCC        | -1.20687 | 2.86E-27  |
| CYP1B1       | -1.05306 | 2.93E-19  |
| YPEL5        | -1.35462 | 1.65E-54  |
| FOSL2        | -2.32558 | 0         |
| DNAJC27      | -1.81941 | 5.11E-39  |
| WDCP         | -1.26191 | 1.43E-24  |
| GDF7         | -1.37708 | 1.15E-14  |
| RHOB         | -3.21248 | 0         |
| PUM2         | -1.68505 | 3.93E-229 |
| OSR1         | -2.10406 | 1.84E-04  |
| RDH14        | -1.41775 | 1.92E-21  |
| LRATD1       | -2.02858 | 7.40E-63  |
| TRIB2        | -2.25997 | 1.24E-49  |
| E2F6         | -1.41693 | 3.61E-37  |
| KLF11        | -1.94009 | 1.50E-98  |
| LOC103220837 | 1.557003 | 4.57E-04  |
| ID2          | -3.36592 | 1.58E-125 |
| ALKAL2       | -1.91765 | 6.41E-21  |
| LOC103221001 | -2.17054 | 1.73E-08  |
| CSRNP1       | -2.75787 | 1.78E-114 |
| ACVR2B       | -1.44422 | 8.15E-69  |
| SLC22A14     | 1.895937 | 8.21E-04  |
| EPM2AIP1     | -1.42878 | 2.76E-59  |
| TBCCD1       | -1.26455 | 2.26E-54  |
| MAGEF1       | -1.0696  | 8.14E-29  |
| EPHB3        | -1.36452 | 8.93E-06  |
| B3GNT5       | -1.81456 | 2.50E-35  |
| KLHL24       | -1.57624 | 8.19E-12  |
| ZMAT3        | -1.10809 | 9.30E-23  |

|              |          |           |
|--------------|----------|-----------|
| GHSR         | 5.355369 | 2.21E-04  |
| SKIL         | -1.99008 | 5.54E-161 |
| PELO         | -2.79831 | 4.57E-238 |
| ZNF639       | -2.12096 | 6.66E-48  |
| GCLC         | -1.08527 | 4.26E-99  |
| GCM1         | -2.76011 | 1.39E-06  |
| PAQR8        | -1.24473 | 1.63E-18  |
| SNX18        | -1.59584 | 1.11E-45  |
| LOC103221425 | -1.96656 | 9.69E-07  |
| RBM4B        | -1.3969  | 6.20E-26  |
| C17H6orf223  | -1.28022 | 2.26E-04  |
| MAD2L1BP     | -2.21592 | 6.38E-53  |
| BICRAL       | -1.50748 | 3.29E-37  |
| TBCC         | -2.28353 | 2.64E-38  |
| SAYSD1       | -1.13648 | 2.51E-05  |
| TBC1D22B     | -1.43748 | 1.51E-59  |
| PIM1         | -2.85063 | 1.48E-160 |
| CDKN1A       | -1.20102 | 0         |
| BRPF3        | -1.10685 | 6.13E-48  |
| MAPK13       | 1.355369 | 3.85E-04  |
| IP6K3        | -2.09541 | 7.75E-65  |
| ZBTB9        | -2.65462 | 6.42E-60  |
| KIFC1        | -1.4508  | 9.76E-113 |
| MAP3K1       | -2.41893 | 0         |
| FKBPL        | -2.17976 | 2.49E-26  |
| MIER3        | -2.06585 | 1.19E-65  |
| ZBTB12       | -1.00891 | 2.31E-07  |
| HSPA1B       | -2.60426 | 0         |
| HSPA1L       | -2.25934 | 3.31E-05  |
| HSPA1A       | -2.47253 | 1.90E-154 |
| NFKBIL1      | -1.05438 | 6.29E-29  |
| LOC103221768 | -1.28514 | 3.70E-10  |
| IER3         | -2.56868 | 0         |
| PLK2         | -2.40965 | 0         |
| PPP1R10      | -2.90543 | 0         |
| TRIM26       | -1.63169 | 2.10E-31  |
| PDE4D        | -1.45199 | 1.20E-132 |
| ZNF311       | -1.47245 | 2.09E-04  |
| ZBED9        | -1.38786 | 1.02E-07  |
| ZKSCAN4      | -1.50261 | 1.04E-06  |
| ZNF165       | -4.22959 | 1.19E-04  |
| ZSCAN16      | -2.25344 | 3.30E-06  |
| ZKSCAN8      | -1.27002 | 2.56E-51  |
| LOC103221947 | -1.25544 | 3.55E-04  |

|              |          |           |
|--------------|----------|-----------|
| ZNF391       | -1.28849 | 6.54E-05  |
| ZNF184       | -1.89761 | 9.69E-11  |
| ZNF322       | -1.60429 | 2.71E-29  |
| ABT1         | -1.42514 | 1.08E-29  |
| LOC103222011 | -1.16736 | 2.11E-29  |
| LOC103222014 | -1.36923 | 1.58E-12  |
| ZSWIM6       | -1.03085 | 2.81E-23  |
| E2F3         | -1.60341 | 1.72E-30  |
| KIF13A       | -1.02855 | 2.81E-18  |
| NUP153       | -1.23542 | 6.23E-117 |
| MYLIP        | -2.28022 | 1.64E-08  |
| JARID2       | -1.53142 | 1.24E-20  |
| EDN1         | -2.93003 | 4.97E-194 |
| HIVEP1       | -1.68416 | 1.33E-47  |
| NEDD9        | -2.40772 | 3.60E-33  |
| TFAP2A       | -2.08309 | 3.94E-105 |
| SNRNP48      | -1.00355 | 2.97E-11  |
| RREB1        | -1.36246 | 9.31E-134 |
| PPP1R3G      | -1.09714 | 2.22E-10  |
| PXDC1        | -1.23729 | 1.05E-41  |
| FOXC1        | -1.87217 | 2.83E-38  |
| FOXF2        | -1.71238 | 2.38E-39  |
| FOXQ1        | -3.85408 | 9.12E-17  |
| TAF8         | -1.33495 | 6.16E-04  |
| LOC103222346 | -1.05967 | 1.15E-04  |
| LOC103222352 | -1.0216  | 4.22E-22  |
| ZSCAN12      | -2.74351 | 1.65E-15  |
| LOC103222374 | -1.28185 | 5.64E-30  |
| LOC103222379 | -1.59216 | 6.62E-04  |
| SMAD4        | -1.05862 | 2.37E-52  |
| ELAC1        | -1.21098 | 3.85E-09  |
| LIPG         | -2.13788 | 1.76E-21  |
| SMAD7        | -3.62707 | 1.22E-133 |
| MAST4        | -1.04385 | 1.21E-22  |
| ZNF397       | -1.13367 | 3.92E-11  |
| ASXL3        | -2.17237 | 7.19E-29  |
| KLHL14       | -2.76011 | 1.39E-06  |
| RNF138       | -1.50261 | 2.29E-19  |
| PIK3R1       | -2.4158  | 0         |
| TGIF1        | -2.51937 | 0         |
| LOC103222706 | -2.77391 | 1.06E-19  |
| ZBTB14       | -1.06467 | 1.82E-17  |
| ANKRD12      | -1.08435 | 1.73E-43  |
| CHMP1B       | -1.15401 | 3.10E-98  |

|              |          |           |
|--------------|----------|-----------|
| LOC103222806 | 2.763246 | 1.06E-04  |
| CEP76        | -1.38278 | 1.65E-18  |
| CECR2        | -1.52342 | 3.11E-12  |
| USP18        | 1.023525 | 5.17E-05  |
| HIC2         | -1.34754 | 3.72E-13  |
| CRKL         | -1.33183 | 1.11E-99  |
| ZNF74        | -1.24896 | 2.53E-09  |
| TMEM171      | -2.04456 | 3.12E-15  |
| ZNF70        | -1.62648 | 2.25E-05  |
| FOXD1        | -1.41415 | 1.00E-23  |
| PHRF1        | -1.12371 | 2.46E-75  |
| ADORA2A      | 1.042037 | 3.10E-15  |
| ASPHD2       | -1.17515 | 1.60E-04  |
| MN1          | -2.26679 | 6.94E-71  |
| ENC1         | -1.11199 | 3.38E-12  |
| CCDC117      | -1.59662 | 4.71E-67  |
| XBP1         | -1.99324 | 3.76E-221 |
| CASTOR1      | -1.67705 | 2.49E-11  |
| GAL3ST1      | -1.28849 | 9.78E-10  |
| DUSP18       | -1.11452 | 1.51E-09  |
| PATZ1        | -1.14424 | 2.34E-43  |
| EIF4ENIF1    | -1.97463 | 3.36E-141 |
| PRR14L       | -1.30251 | 5.34E-108 |
| DEPDC5       | -1.23266 | 1.14E-51  |
| HMGXB4       | -1.74459 | 4.15E-88  |
| HMOX1        | -1.11957 | 6.42E-50  |
| RASD2        | -1.0978  | 1.82E-28  |
| HMGCR        | -1.87203 | 0         |
| C1QTNF6      | -1.05967 | 1.76E-06  |
| ELFN2        | -1.11499 | 1.21E-51  |
| H1F0         | -1.15928 | 0         |
| PDGFB        | -2.15332 | 2.18E-304 |
| F2RL2        | -1.36204 | 3.04E-08  |
| F2RL1        | -1.12304 | 5.85E-72  |
| EP300        | -1.48777 | 2.80E-276 |
| TEF          | -2.12005 | 2.11E-135 |
| TOB2         | -2.96225 | 6.94E-153 |
| TCF20        | -1.30154 | 1.31E-87  |
| RTL6         | -1.6519  | 6.19E-134 |
| BRD1         | -1.4706  | 5.79E-67  |
| PIM3         | -1.11928 | 1.41E-21  |
| ZBED4        | -2.75225 | 1.13E-84  |
| TNRC6B       | -1.2155  | 4.62E-26  |
| HSPA6        | -2.96656 | 2.72E-19  |

|           |          |           |
|-----------|----------|-----------|
| MPZ       | -1.16489 | 1.22E-04  |
| PIGM      | -1.31803 | 1.90E-08  |
| TMEM151A  | -1.42753 | 2.45E-06  |
| ETV3      | -1.93765 | 7.21E-80  |
| PRCC      | -1.26002 | 2.40E-70  |
| BGLAP     | 1.1271   | 7.74E-04  |
| PAQR6     | 1.468579 | 1.92E-07  |
| MEF2D     | -1.2481  | 1.37E-32  |
| MEX3A     | -1.42663 | 9.38E-14  |
| HCN3      | 1.091211 | 3.07E-17  |
| EFNA1     | -2.27561 | 5.95E-58  |
| EFNA3     | -1.28022 | 5.10E-11  |
| ZBTB7B    | -1.30038 | 5.51E-58  |
| EFNA4     | -2.01387 | 3.53E-19  |
| IL6R      | -1.60201 | 2.98E-31  |
| GATAD2B   | -1.14247 | 2.47E-40  |
| S100A8    | 1.402674 | 1.55E-04  |
| RORC      | -1.36084 | 6.50E-05  |
| SNX27     | -1.16336 | 5.98E-06  |
| POGZ      | -1.25356 | 4.25E-88  |
| ZNF687    | -1.72567 | 9.47E-114 |
| TXNIP     | -3.42585 | 0         |
| ANKRD34A  | -2.64463 | 1.48E-07  |
| PEX11B    | -1.36084 | 1.82E-16  |
| PDZK1     | -1.70886 | 3.87E-80  |
| CD160     | -1.0718  | 3.46E-18  |
| ZNF697    | -2.58082 | 1.13E-20  |
| VCAN      | -1.02169 | 0         |
| VANGL1    | -1.09157 | 2.21E-38  |
| NGF       | -1.39842 | 3.57E-101 |
| RSBN1     | -2.50545 | 7.11E-98  |
| LRIG2     | -1.28618 | 5.25E-19  |
| CTTNBP2NL | -1.3951  | 1.12E-64  |
| DDX20     | -1.99143 | 2.54E-68  |
| LRIF1     | -1.3302  | 3.36E-32  |
| RBM15     | -1.61548 | 1.16E-11  |
| AMIGO1    | -2.61864 | 4.21E-12  |
| ATXN7L2   | -1.54275 | 2.32E-09  |
| GPSM2     | -1.13725 | 2.13E-45  |
| PRPF38B   | -1.4567  | 7.76E-129 |
| FAM102B   | -1.36842 | 1.87E-19  |
| VAV3      | -1.88792 | 4.77E-105 |
| SASS6     | -1.44264 | 3.25E-57  |
| MFS14A    | -1.28817 | 6.94E-87  |

|              |          |           |
|--------------|----------|-----------|
| F3           | -2.04098 | 1.21E-27  |
| ARHGAP29     | -1.19635 | 0         |
| ZNF644       | -1.03369 | 3.10E-39  |
| LYSMD3       | -1.41299 | 7.83E-69  |
| RBMXL1       | -1.92438 | 6.43E-60  |
| LOC103224490 | -3.8443  | 8.34E-22  |
| LMO4         | -1.38481 | 2.44E-97  |
| ZNHIT6       | -1.17984 | 6.03E-24  |
| CCN1         | -1.70745 | 0         |
| BCL10        | -2.07146 | 4.84E-97  |
| C20H1orf52   | -1.78213 | 2.61E-28  |
| SYDE2        | -1.05735 | 1.53E-18  |
| ARRDC3       | -2.96186 | 0         |
| RPE65        | -2.25934 | 3.31E-05  |
| GADD45A      | -1.28364 | 1.31E-43  |
| PDE4B        | -2.85179 | 9.51E-70  |
| NR2F1        | -1.22271 | 1.74E-08  |
| JUN          | -3.54051 | 0         |
| PARS2        | -2.1346  | 4.40E-46  |
| CPT2         | -1.3161  | 6.99E-78  |
| KTI12        | -2.20942 | 5.17E-36  |
| CDKN2C       | -1.26047 | 2.37E-48  |
| DMRTA2       | 6.677297 | 3.02E-09  |
| TRABD2B      | -1.30602 | 0         |
| FOXD2        | -2.02725 | 2.17E-12  |
| PIK3R3       | -1.24694 | 1.53E-28  |
| CCDC17       | 1.878931 | 5.48E-05  |
| TOE1         | -1.12398 | 9.28E-16  |
| ZNF691       | -1.54275 | 1.69E-13  |
| FOXO6        | -1.5097  | 1.50E-13  |
| LOC103225021 | -2.48593 | 3.93E-05  |
| ZNF684       | -1.4289  | 1.16E-06  |
| RLF          | -2.27656 | 1.42E-144 |
| MFSD2A       | 1.008147 | 7.68E-11  |
| MYCL         | -1.14106 | 4.35E-06  |
| LOC103225049 | 2.331366 | 2.53E-14  |
| MTF1         | -1.67765 | 9.03E-39  |
| LOC103225095 | -3.83915 | 1.21E-31  |
| ZSCAN20      | -2.04318 | 2.48E-18  |
| TRIM62       | -1.12036 | 8.57E-04  |
| IQCC         | -2.21752 | 1.06E-20  |
| COL16A1      | 1.076215 | 1.18E-07  |
| PUM1         | -1.88307 | 0         |
| YTHDF2       | -1.8761  | 1.29E-177 |

|              |          |           |
|--------------|----------|-----------|
| GMEB1        | -1.37422 | 7.04E-15  |
| PHACTR4      | -1.1259  | 1.56E-80  |
| MED18        | -1.01387 | 4.53E-14  |
| SESN2        | -2.31858 | 6.55E-269 |
| PPP1R8       | -1.37516 | 3.46E-80  |
| FAM76A       | -1.31517 | 1.16E-08  |
| AHDC1        | -1.84757 | 4.88E-116 |
| TENT5B       | -2.09152 | 1.25E-18  |
| LOC103225309 | -1.5771  | 2.20E-17  |
| ARID1A       | -1.67622 | 4.73E-253 |
| PDIK1L       | -2.47245 | 2.03E-14  |
| PAQR7        | -1.15871 | 1.21E-14  |
| AUNIP        | -1.49263 | 5.29E-08  |
| SRRM1        | -1.08349 | 1.72E-162 |
| IFNLR1       | -1.20535 | 3.73E-05  |
| PNRC2        | -2.92142 | 1.45E-244 |
| ID3          | -2.28094 | 4.94E-123 |
| ZNF436       | -1.43645 | 9.83E-39  |
| LUZP1        | -1.43858 | 2.08E-98  |
| C1H11orf68   | -1.51039 | 1.11E-73  |
| MUL1         | -1.95206 | 2.74E-77  |
| FAM43B       | -1.63121 | 8.54E-13  |
| IFFO2        | -1.3481  | 4.00E-50  |
| KLHDC7A      | -2.50067 | 5.47E-107 |
| ARHGEF10L    | -1.22009 | 1.05E-43  |
| FBXO42       | -1.47971 | 1.83E-28  |
| SPEN         | -1.72296 | 1.07E-177 |
| FOSL1        | -1.26497 | 2.09E-33  |
| PRDM2        | -1.4716  | 9.53E-57  |
| TNFRSF8      | -1.93741 | 1.83E-04  |
| RHBDL1       | 3.442832 | 4.81E-18  |
| CLCN6        | -1.10016 | 1.04E-50  |
| UBIAD1       | -1.54487 | 5.97E-23  |
| SPSB1        | -2.01589 | 1.79E-18  |
| ERRFI1       | -2.14229 | 1.53E-212 |
| PER3         | -1.24938 | 2.41E-41  |
| THAP3        | -1.15135 | 3.38E-25  |
| PHF13        | -2.38879 | 9.52E-110 |
| KLHL21       | -1.74129 | 2.23E-95  |
| C20H1orf174  | -1.83509 | 1.55E-37  |
| SKI          | -1.92559 | 2.70E-101 |
| ANKRD65      | -1.80669 | 8.91E-82  |
| LOC103225820 | -2.1852  | 1.85E-11  |
| PLEKHN1      | 1.361764 | 5.95E-13  |



|              |          |           |
|--------------|----------|-----------|
| LOC103225896 | -2.45199 | 5.66E-05  |
| STIL         | -1.48151 | 1.32E-52  |
| LOC103225945 | -2.74437 | 7.14E-59  |
| RNF19B       | -1.30952 | 8.21E-21  |
| LOC103225955 | -1.32816 | 3.76E-18  |
| LOC103226004 | -2.74015 | 9.39E-39  |
| ZNF273       | -2.33113 | 3.87E-37  |
| ZNF107       | -1.58608 | 5.76E-10  |
| ZNF680       | -1.95396 | 4.44E-17  |
| FIGNL1       | -1.88685 | 1.06E-51  |
| PURB         | -1.08926 | 5.53E-71  |
| LOC103226149 | -1.05749 | 5.77E-63  |
| HECW1        | -1.31706 | 3.99E-05  |
| LOC103226163 | -1.55817 | 5.67E-40  |
| INHBA        | -1.0331  | 0         |
| CRAMP1       | -1.54638 | 1.28E-43  |
| CDK13        | -1.05433 | 8.13E-134 |
| KBTBD2       | -1.46142 | 1.50E-129 |
| AVL9         | -1.2638  | 1.13E-91  |
| EME2         | 1.450006 | 1.67E-08  |
| HOXA13       | -2.42599 | 3.96E-06  |
| HOXA1        | -1.20884 | 2.78E-08  |
| HOXA3        | -2.23591 | 3.43E-39  |
| HOXA4        | -1.3184  | 2.05E-06  |
| HOXA5        | -2.16807 | 1.16E-28  |
| HOXA6        | -2.00582 | 9.94E-26  |
| HOXA9        | -1.25196 | 1.81E-65  |
| LOC103226329 | -2.32197 | 2.69E-07  |
| HOXA10       | -1.39024 | 3.19E-12  |
| SP4          | -1.84124 | 3.19E-75  |
| SP8          | -4.61042 | 1.61E-20  |
| ITGB8        | -1.17269 | 1.36E-20  |
| AHR          | -2.15529 | 2.70E-76  |
| ARL4A        | -2.60611 | 8.20E-23  |
| GLCCI1       | -1.29878 | 2.51E-24  |
| DLX5         | -1.65183 | 2.77E-12  |
| DLX6         | -2.10406 | 4.55E-18  |
| SAMD9        | -4.16819 | 1.79E-04  |
| RBM48        | -2.67648 | 5.99E-48  |
| MTERF1       | -1.4377  | 2.46E-19  |
| FZD1         | -1.53562 | 2.92E-55  |
| DBF4         | -1.43925 | 4.58E-42  |
| RSBN1L       | -2.60913 | 4.60E-29  |
| TMEM60       | -1.37255 | 1.46E-05  |

|              |          |           |
|--------------|----------|-----------|
| NAPEPLD      | -1.20466 | 6.94E-23  |
| KMT2E        | -2.04404 | 5.69E-206 |
| CCDC71L      | -2.67438 | 3.88E-16  |
| HBP1         | -2.45889 | 1.21E-66  |
| CBLL1        | -1.05428 | 6.14E-21  |
| DNAJB9       | -1.42284 | 2.01E-16  |
| THAP5        | -1.73548 | 3.50E-39  |
| LRRN3        | -1.60449 | 3.54E-103 |
| CTTNBP2      | -1.61221 | 8.69E-58  |
| ING3         | -1.18895 | 8.14E-06  |
| ZNF800       | -1.01589 | 2.49E-07  |
| GCC1         | -1.26029 | 3.41E-15  |
| HILPDA       | -2.72777 | 3.60E-210 |
| AP5B1        | -1.29864 | 2.06E-09  |
| CNOT4        | -1.15836 | 1.66E-48  |
| LOC103226962 | 1.028313 | 4.88E-78  |
| KAT5         | -2.18145 | 2.74E-127 |
| TRIM24       | -1.32626 | 5.68E-174 |
| TMEM139      | -1.0462  | 7.27E-12  |
| TCAF2        | -1.05723 | 1.34E-06  |
| LOC103227175 | -1.87596 | 1.93E-15  |
| ZNF786       | -1.97455 | 5.72E-14  |
| ZNF398       | -2.17742 | 6.22E-58  |
| ZNF282       | -1.1362  | 4.65E-41  |
| ZNF212       | -2.78213 | 3.91E-76  |
| ZNF205       | -1.27561 | 5.99E-18  |
| ZNF746       | -2.01167 | 6.38E-65  |
| ZNF862       | -1.08623 | 9.76E-19  |
| ZNF775       | -2.63228 | 3.66E-36  |
| KMT2C        | -1.12145 | 2.22E-83  |
| INSIG1       | -2.21141 | 0         |
| ZNF200       | -1.3184  | 1.07E-43  |
| MNX1         | -1.02314 | 1.11E-08  |
| ZNF263       | -1.67135 | 2.22E-50  |
| LOC103227406 | -1.88304 | 3.56E-11  |
| TIGD7        | -2.05771 | 1.82E-19  |
| EIF1B        | -1.57972 | 1.84E-72  |
| ZNF619       | -1.28323 | 2.61E-06  |
| ZNF621       | -1.69526 | 8.74E-08  |
| ZNF174       | -1.20102 | 5.75E-08  |
| SNRK         | -1.46188 | 2.67E-28  |
| ZNF197       | -1.28077 | 2.76E-15  |
| ZNF597       | -2.16819 | 9.33E-05  |
| ZNF35        | -1.04492 | 2.53E-07  |

|              |          |           |
|--------------|----------|-----------|
| SLX4         | -1.11412 | 1.83E-16  |
| CCDC12       | -1.0706  | 9.37E-19  |
| SETD2        | -1.38487 | 6.18E-102 |
| TREX1        | -1.66728 | 2.93E-37  |
| IP6K2        | -1.10905 | 2.49E-49  |
| WDR6         | -1.01506 | 4.36E-201 |
| QRICH1       | -1.10923 | 1.01E-119 |
| GLIS2        | -2.42448 | 1.23E-110 |
| CCDC71       | -2.15275 | 3.59E-40  |
| VASN         | -2.32223 | 5.63E-269 |
| INKA1        | -4.03695 | 4.10E-04  |
| TMEM115      | -1.49555 | 5.75E-82  |
| CISH         | -2.11326 | 1.40E-06  |
| LOC103227687 | 1.252049 | 3.73E-30  |
| RBM15B       | -2.17817 | 3.89E-112 |
| DUSP7        | -1.73308 | 3.87E-88  |
| ZNF500       | -1.3076  | 8.40E-05  |
| KCTD6        | -1.58323 | 2.58E-08  |
| ADAMTS9      | -1.13702 | 3.88E-246 |
| KBTBD8       | -1.50261 | 1.04E-06  |
| LOC103227869 | 2.528737 | 1.30E-151 |
| FRMD4B       | -1.7585  | 6.04E-110 |
| LOC103227890 | -2.26976 | 1.83E-09  |
| RYBP         | -1.28552 | 2.04E-61  |
| EBLN2        | -3.03695 | 2.01E-08  |
| PPP4R2       | -1.02775 | 6.96E-90  |
| BHLHE40      | -3.66876 | 0         |
| SETD5        | -1.06316 | 7.13E-126 |
| TMEM186      | -1.41402 | 2.53E-24  |
| WNT7A        | -1.13283 | 2.05E-30  |
| CCDC174      | -1.9399  | 1.90E-49  |
| C5H16orf72   | -1.0842  | 3.04E-85  |
| TMCC1        | -1.00245 | 3.22E-52  |
| ATF7IP2      | -1.09435 | 3.41E-25  |
| GATA2        | -1.26441 | 1.18E-27  |
| KLF15        | -2.41017 | 2.80E-07  |
| SLC12A8      | 4.262259 | 7.76E-07  |
| MUC13        | 3.525294 | 4.14E-04  |
| DTX3L        | -1.27646 | 6.16E-26  |
| WDR5B        | -1.41622 | 1.05E-11  |
| HCLS1        | 1.577761 | 7.46E-04  |
| FBXO40       | 5.525294 | 8.16E-05  |
| SOCS1        | -4.73209 | 2.02E-06  |
| USF3         | -2.15098 | 6.30E-21  |

|              |          |           |
|--------------|----------|-----------|
| NEPRO        | -1.71292 | 2.94E-73  |
| CBLB         | -1.58301 | 3.53E-116 |
| SNN          | -1.63981 | 5.52E-34  |
| NFKBIZ       | -3.26015 | 0         |
| ZBTB11       | -1.49481 | 4.81E-52  |
| TRMT10C      | -1.67298 | 2.19E-88  |
| FILIP1L      | -2.54664 | 1.38E-115 |
| GPR15        | -1.84894 | 1.92E-78  |
| RIOX2        | 1.225488 | 1.15E-38  |
| C22H3orf38   | -2.21981 | 8.08E-74  |
| ERCC4        | -1.34393 | 6.88E-27  |
| LOC103228631 | -2.41722 | 8.12E-05  |
| LOC103228639 | -3.76901 | 5.59E-06  |
| IRF9         | -1.58715 | 2.30E-33  |
| NFKBIA       | -2.95152 | 6.77E-304 |
| INSM2        | -1.45199 | 2.74E-04  |
| NKX2-8       | -1.78759 | 2.33E-04  |
| PAX9         | -2.12036 | 5.01E-08  |
| FOXA1        | -2.34811 | 4.72E-17  |
| FBXO33       | -1.77708 | 3.47E-29  |
| C24H14orf28  | -2.13006 | 2.86E-14  |
| KLHL28       | -1.68355 | 3.95E-16  |
| FANCM        | -1.33978 | 9.94E-18  |
| MGAT2        | -1.15318 | 2.27E-70  |
| DNAAF2       | -1.25253 | 9.55E-13  |
| ARF6         | -1.76129 | 0         |
| SAV1         | -1.00901 | 1.58E-39  |
| BMP4         | -3.57537 | 2.94E-09  |
| FBXO34       | -2.7114  | 2.12E-166 |
| ATG14        | -1.84627 | 5.66E-28  |
| PELI2        | -1.56217 | 1.47E-04  |
| ITPRIPL2     | -1.65009 | 8.08E-16  |
| ARID4A       | -1.45389 | 5.25E-36  |
| SIX1         | -1.65844 | 1.03E-18  |
| SIX4         | -1.13767 | 7.14E-06  |
| TRMT5        | -1.6605  | 2.80E-52  |
| GPHB5        | 7.309565 | 2.92E-13  |
| WDR89        | -1.30733 | 2.46E-45  |
| ESR2         | 4.940331 | 7.11E-11  |
| AKAP5        | 2.498444 | 1.01E-102 |
| ZBTB25       | -2.08623 | 9.41E-32  |
| ZBTB1        | -1.00162 | 1.25E-25  |
| HSPA2        | -2.32913 | 6.88E-72  |
| ZFP36L1      | -2.9799  | 0         |

|              |          |           |
|--------------|----------|-----------|
| ZFYVE1       | -1.14182 | 4.91E-44  |
| ACOT6        | -1.04517 | 1.07E-04  |
| ELMSAN1      | -1.8042  | 4.79E-82  |
| ZC2HC1C      | -1.64012 | 1.17E-18  |
| FOS          | -2.29998 | 1.64E-06  |
| LOC103229355 | -1.61936 | 2.13E-16  |
| GPATCH2L     | -1.00011 | 3.20E-12  |
| IRF2BPL      | -2.7455  | 8.77E-115 |
| DCUN1D3      | -1.70475 | 6.90E-24  |
| STON2        | -1.03458 | 3.49E-05  |
| TIGD3        | -2.45199 | 1.37E-07  |
| NRDE2        | -1.86404 | 3.19E-75  |
| TMEM251      | -1.02606 | 5.16E-09  |
| BTBD7        | -1.89637 | 3.12E-205 |
| SERPINA10    | -4.22959 | 1.19E-04  |
| DICER1       | -1.22394 | 1.79E-127 |
| CDR2         | -1.05461 | 1.87E-35  |
| CDC42EP2     | -1.72065 | 2.30E-34  |
| SCNN1B       | 1.969478 | 1.08E-14  |
| WDR20        | -1.1112  | 1.50E-19  |
| BAG5         | -1.12913 | 3.70E-41  |
| CDCA4        | -1.74001 | 3.60E-72  |
| LOC103229802 | 3.525294 | 4.14E-04  |
| RBBP6        | -1.85879 | 1.01E-222 |
| TNRC6A       | -1.31115 | 9.11E-119 |
| LOC103229898 | -3.22959 | 5.16E-04  |
| MLH3         | -1.46092 | 3.68E-16  |
| ALKBH1       | -1.17664 | 3.25E-08  |
| HIST3H2A     | -1.77995 | 8.88E-42  |
| TRIM11       | -1.40064 | 3.30E-43  |
| LOC103229978 | -1.8045  | 4.21E-10  |
| ZKSCAN2      | -1.77057 | 1.10E-40  |
| FBXO28       | -1.26469 | 9.24E-68  |
| TLR5         | -2.41236 | 4.47E-37  |
| DUSP10       | -1.68416 | 1.47E-09  |
| HLX          | -2.01809 | 9.11E-18  |
| TGFB2        | -1.1614  | 8.92E-136 |
| ATF3         | -1.49366 | 4.62E-55  |
| NEK2         | -1.25255 | 6.21E-43  |
| TRAF5        | -1.04551 | 2.15E-10  |
| C25H1orf74   | -2.4354  | 5.91E-33  |
| YOD1         | -3.20102 | 9.61E-99  |
| C25H1orf116  | -2.12771 | 1.00E-10  |
| DYRK3        | -2.01028 | 1.37E-20  |

|              |          |           |
|--------------|----------|-----------|
| ELK4         | -1.01719 | 1.55E-12  |
| NUAK2        | -3.14814 | 0         |
| PPP1R15B     | -2.4528  | 3.88E-165 |
| ZBED6        | -1.58404 | 7.72E-43  |
| BTG2         | -3.38448 | 2.78E-172 |
| KDM5B        | -2.07298 | 2.92E-119 |
| ARL8A        | -1.50205 | 1.50E-63  |
| ELF3         | -3.49591 | 0         |
| TNNI1        | 2.691228 | 3.19E-15  |
| CAMSAP2      | -1.09971 | 3.27E-75  |
| ZNF281       | -2.61601 | 1.21E-165 |
| LOC103230365 | -1.27232 | 2.31E-45  |
| ZBTB41       | -1.0635  | 2.09E-22  |
| ASPM         | -1.34037 | 2.78E-151 |
| RGS2         | -2.68387 | 6.97E-231 |
| RGL1         | -1.36181 | 7.68E-90  |
| RNASEL       | -1.17084 | 1.32E-14  |
| GLUL         | -1.75501 | 0         |
| IER5         | -3.60702 | 1.94E-72  |
| KIAA1614     | -1.12576 | 2.55E-07  |
| ABL2         | -1.74417 | 4.08E-55  |
| RASAL2       | -1.05474 | 1.52E-25  |
| PIGC         | -1.21538 | 2.56E-22  |
| GORAB        | -1.2769  | 1.16E-11  |
| METTL18      | -2.17278 | 4.53E-39  |
| TADA1        | -1.76106 | 2.69E-62  |
| POGK         | -1.36827 | 4.41E-63  |
| RGS5         | 1.288254 | 3.37E-05  |
| RHOU         | -1.89256 | 6.69E-05  |
| CCSAP        | -2.21449 | 9.98E-17  |
| URB2         | -1.26578 | 3.32E-25  |
| EXOC8        | -2.69886 | 2.94E-54  |
| MAP3K21      | -1.57624 | 1.64E-22  |
| PAGR1        | -1.07912 | 1.82E-28  |
| IRF2BP2      | -2.95929 | 0         |
| ARID4B       | -1.48097 | 2.42E-120 |
| ZNHIT2       | -1.69908 | 2.43E-07  |
| ZBTB18       | -2.21262 | 3.52E-112 |
| ZNF771       | -1.10406 | 2.27E-04  |
| ZNF48        | -1.75316 | 8.63E-18  |
| KIF28P       | -1.45199 | 6.88E-07  |
| ZNF670       | -2.16819 | 1.30E-06  |
| ZNF124       | -1.71992 | 1.53E-04  |
| LOC103230923 | -1.33052 | 4.67E-07  |

|              |          |           |
|--------------|----------|-----------|
| LOC103230939 | -1.08045 | 3.15E-36  |
| LOC103230963 | -1.4698  | 2.17E-16  |
| PGBD2        | -1.95542 | 3.76E-10  |
| SRCAP        | -1.03353 | 1.07E-114 |
| H3F3A        | -1.32234 | 4.80E-64  |
| WHAMM        | -1.12896 | 2.75E-09  |
| ZNF592       | -1.1716  | 3.75E-71  |
| ZSCAN2       | -1.44461 | 5.17E-10  |
| AKAP13       | -1.25114 | 0         |
| DET1         | -1.07588 | 1.04E-15  |
| AEN          | -1.54756 | 5.78E-84  |
| SETD1A       | -1.17655 | 5.05E-73  |
| GDPGP1       | -2.21232 | 6.56E-08  |
| ZNF774       | -1.07304 | 2.38E-08  |
| CHD2         | -1.7462  | 2.09E-270 |
| NR2F2        | -1.53279 | 5.38E-24  |
| ARRDC4       | -1.57565 | 7.68E-67  |
| ZNF646       | -2.36586 | 2.48E-63  |
| ZNF668       | -2.3671  | 1.73E-30  |
| LYSMD4       | -2.99715 | 1.59E-17  |
| ASB7         | -1.41965 | 2.00E-36  |
| CHSY1        | -1.72436 | 4.74E-34  |
| SALL2        | -2.18749 | 8.85E-108 |
| ARMC5        | -2.13425 | 5.17E-39  |
| C29H14orf119 | -1.21681 | 1.50E-36  |
| HOMEZ        | -2.84726 | 9.11E-128 |
| NGDN         | -1.00748 | 1.61E-20  |
| ZFHX2        | -2.42397 | 8.68E-34  |
| TICRR        | -1.67411 | 1.62E-51  |
| ZNF267       | -1.84167 | 2.00E-25  |
| SHROOM2      | -1.43027 | 2.90E-75  |
| CDKL5        | -1.22342 | 2.41E-09  |
| BCLAF3       | -1.53279 | 5.38E-24  |
| KLHL34       | 2.255833 | 4.08E-07  |
| LOC103231695 | -1.36405 | 2.87E-67  |
| KLHL15       | -1.09529 | 1.51E-20  |
| CREBBP       | -1.02574 | 1.77E-45  |
| MID1IP1      | -1.57481 | 2.53E-51  |
| BCOR         | -2.11722 | 1.90E-112 |
| DDX3X        | -1.01446 | 0         |
| PALB2        | -2.10108 | 1.88E-75  |
| LOC103231885 | -1.19581 | 2.69E-08  |
| ZNF41        | -1.26544 | 2.86E-13  |
| LOC103231911 | -1.20942 | 1.69E-08  |

|              |          |           |
|--------------|----------|-----------|
| SUV39H1      | -1.04278 | 3.28E-28  |
| PIM2         | -1.13648 | 2.88E-15  |
| CCDC120      | -1.34507 | 9.32E-20  |
| UBQLN2       | -1.1945  | 1.01E-64  |
| LOC103232070 | 1.227605 | 1.43E-06  |
| SPIN4        | -1.08942 | 9.62E-10  |
| AMER1        | -1.37694 | 7.40E-10  |
| PJA1         | -1.16065 | 2.06E-10  |
| RTL5         | -1.11508 | 3.81E-15  |
| ERCC6L       | -2.01908 | 1.04E-156 |
| CITED1       | 2.548014 | 4.80E-05  |
| RLIM         | -1.52727 | 4.50E-42  |
| NEXMIF       | -2.59883 | 3.89E-04  |
| MAGEE1       | -1.37454 | 1.23E-12  |
| LOC103232262 | -1.20428 | 5.13E-56  |
| PABPC5       | -1.84477 | 1.26E-13  |
| PCDH11X      | 1.247733 | 2.41E-63  |
| GPRASP1      | -1.09019 | 3.51E-07  |
| PWWP3B       | -2.3076  | 2.37E-04  |
| SIAH1        | -1.81706 | 9.53E-38  |
| CLDN2        | -1.06919 | 2.71E-34  |
| RBM41        | 1.60472  | 2.75E-129 |
| TSC22D3      | -1.9316  | 1.30E-223 |
| RTL9         | -1.45199 | 3.47E-08  |
| APLN         | 1.198643 | 1.96E-06  |
| BCORL1       | -1.40136 | 5.75E-61  |
| ZNF423       | -1.43719 | 1.77E-05  |
| CNEP1R1      | -1.79031 | 3.75E-45  |
| ZIC3         | -2.33853 | 2.00E-20  |
| LOC103232659 | -4.22899 | 2.97E-08  |
| MCF2         | 4.355369 | 3.65E-04  |
| LOC103232720 | -1.90247 | 9.23E-08  |
| SALL1        | -2.66206 | 2.11E-60  |
| ZFP92        | -1.93003 | 1.83E-06  |
| ZFX          | -1.18241 | 1.57E-14  |
| USP27X       | -2.61042 | 1.47E-13  |
| IRX3         | -2.71684 | 4.22E-15  |
| IRX5         | -3.3816  | 2.43E-11  |
| HERPUD1      | -1.30524 | 8.63E-81  |
| RSPRY1       | -1.2053  | 8.32E-101 |
| RASGRP2      | 1.795941 | 4.21E-04  |
| PDP2         | -1.41739 | 2.72E-63  |
| RRAD         | -2.45199 | 6.76E-09  |
| CMTR2        | -3.16819 | 8.45E-43  |



|              |          |           |
|--------------|----------|-----------|
| LOC103233166 | 8.222771 | 3.31E-22  |
| ZNF19        | -1.65844 | 7.50E-13  |
| ATXN1L       | -1.31049 | 7.36E-106 |
| ZFHX3        | -1.08381 | 2.23E-78  |
| COG8         | -1.2402  | 1.14E-58  |
| LOC103233222 | -1.16346 | 6.66E-07  |
| SMPD3        | -1.48113 | 7.99E-06  |
| DDX28        | -2.48704 | 1.88E-48  |
| THAP11       | -1.34361 | 1.75E-41  |
| C5H16orf70   | -1.86598 | 7.42E-64  |
| ZFP1         | -2.13006 | 4.98E-23  |
| LOC103233308 | 2.162724 | 6.42E-04  |
| BCAR1        | -1.6492  | 2.07E-141 |
| MAF          | -2.45199 | 5.66E-05  |
| ATMIN        | -1.40741 | 1.74E-65  |
| MLYCD        | -1.04342 | 2.04E-16  |
| OSGIN1       | -1.5652  | 3.48E-20  |
| CRISPLD2     | -1.04999 | 1.32E-32  |
| FOXC2        | -2.41722 | 1.38E-08  |
| SLC7A5       | 1.037141 | 9.34E-164 |
| ZFPM1        | -1.49092 | 2.72E-17  |
| CDT1         | -1.63487 | 6.81E-90  |
| FLRT1        | -1.67705 | 3.38E-06  |
| LOC103233486 | 1.414262 | 6.89E-04  |
| MISP         | -1.25526 | 1.38E-59  |
| MIDN         | -2.7254  | 2.49E-158 |
| PCSK4        | 1.999225 | 1.06E-05  |
| LOC103233620 | -4.45199 | 2.31E-05  |
| MOB3A        | -1.50104 | 2.30E-34  |
| MKNK2        | -1.14606 | 1.26E-115 |
| GADD45B      | -1.46784 | 5.12E-121 |
| ZNF554       | -2.10406 | 1.39E-09  |
| ZNF555       | -2.57274 | 1.54E-14  |
| ZNF57        | -1.76011 | 7.99E-06  |
| LOC103233665 | -2.31706 | 2.11E-14  |
| LRG1         | -1.39952 | 1.34E-04  |
| PLIN4        | -1.92866 | 3.27E-19  |
| ZBTB7A       | -1.73622 | 3.56E-95  |
| FEM1A        | -3.05483 | 1.54E-105 |
| TICAM1       | -2.84103 | 5.36E-55  |
| SAFB         | -1.0177  | 3.44E-133 |
| SAFB2        | -1.18456 | 3.47E-81  |
| CAMSAP3      | -1.46746 | 1.22E-18  |
| LRRC8E       | -1.5717  | 4.89E-29  |

|              |          |          |
|--------------|----------|----------|
| ZNF558       | -1.70048 | 2.08E-19 |
| ZNF317       | -2.12771 | 1.44E-39 |
| ZNF699       | -2.20535 | 6.57E-06 |
| ZNF266       | -2.81456 | 9.26E-13 |
| ZNF121       | -3.31706 | 5.95E-14 |
| LOC103233870 | -1.45733 | 3.88E-26 |
| ZBTB3        | -5.61042 | 1.96E-21 |
| S1PR5        | -1.59459 | 1.42E-05 |
| CDKN2D       | -1.0271  | 6.21E-07 |
| ANGPTL8      | -1.86186 | 2.53E-13 |
| SWSAP1       | -2.09089 | 4.13E-26 |
| ZNF627       | -2.46585 | 5.96E-50 |
| ZNF823       | -2.95542 | 2.61E-30 |
| LOC103233944 | -1.59696 | 1.56E-10 |
| LOC103233945 | -1.38879 | 6.06E-04 |
| LRRN4CL      | -1.13547 | 7.03E-18 |
| ZNF136       | -1.30359 | 9.05E-06 |
| ZNF44        | -1.73814 | 2.18E-15 |
| ZNF709       | -1.96656 | 9.69E-07 |
| LOC103233973 | -2.64463 | 9.99E-24 |
| ZNF490       | -1.9458  | 6.87E-06 |
| JUNB         | -4.35421 | 0        |
| INTS5        | -2.11787 | 6.54E-91 |
| IER2         | -1.78623 | 1.05E-88 |
| DNAJB1       | -2.79868 | 0        |
| TUT1         | -1.0791  | 1.10E-17 |
| NOTCH3       | -1.06716 | 1.43E-06 |
| MED26        | -2.50045 | 1.07E-32 |
| HAUS8        | -1.29056 | 1.51E-34 |
| MAP1S        | -1.17432 | 4.49E-46 |
| RAB3A        | -1.43313 | 2.13E-11 |
| IQC�         | -1.60043 | 4.62E-13 |
| JUND         | -2.74072 | 0        |
| GDF15        | -1.82834 | 3.09E-48 |
| ELL          | -1.27217 | 7.73E-31 |
| KLHL26       | -1.7587  | 1.27E-42 |
| ZNF14        | -2.31139 | 4.15E-12 |
| ZNF101       | -2.01809 | 1.96E-09 |
| TSSK6        | -4.22959 | 1.19E-04 |
| ZNF253       | -2.0293  | 5.14E-08 |
| LOC103234239 | -3.72358 | 9.72E-06 |
| LOC103234241 | -2.18451 | 2.48E-13 |
| LOC103234249 | -1.98702 | 2.82E-11 |
| LOC103234255 | -2.74897 | 3.71E-10 |

|              |          |           |
|--------------|----------|-----------|
| LOC103234265 | -1.50713 | 5.74E-05  |
| ZNF430       | -1.64463 | 4.83E-13  |
| ZNF675       | -3.03695 | 5.75E-06  |
| MIER2        | -1.20415 | 3.58E-30  |
| PIAS4        | -1.20586 | 2.85E-30  |
| LDLR         | -1.1591  | 1.13E-188 |
| ZNF441       | -2.73209 | 1.48E-13  |
| ZNF791       | -3.82785 | 2.05E-16  |
| PLEKHF1      | -1.84975 | 1.72E-06  |
| CEBPA        | -1.18653 | 1.86E-14  |
| LOC103234475 | -1.08662 | 1.47E-06  |
| ZNF599       | -2.12036 | 5.01E-08  |
| ZNF792       | -3.03695 | 5.75E-06  |
| KMT2B        | -1.51176 | 1.46E-74  |
| LIN37        | -1.60207 | 7.17E-19  |
| NFKBID       | -1.5191  | 2.06E-05  |
| LRFN3        | -1.89461 | 9.15E-25  |
| SDHAF1       | -1.8045  | 4.21E-10  |
| ZNF565       | -2.21449 | 6.57E-09  |
| ZFP82        | -3.1134  | 1.50E-19  |
| ZNF567       | -1.86186 | 2.53E-13  |
| ZNF382       | -1.0271  | 5.69E-05  |
| ZNF420       | -1.73209 | 3.59E-08  |
| ZNF383       | -1.5451  | 9.67E-07  |
| ZNF875       | -2.19153 | 2.77E-16  |
| ZNF570       | -1.12462 | 2.40E-04  |
| LRFN1        | -1.01387 | 5.17E-10  |
| ZFP36        | -3.39952 | 8.84E-95  |
| EID2B        | -1.46746 | 1.22E-18  |
| EID2         | -1.33701 | 3.22E-19  |
| DYRK1B       | -1.37216 | 1.02E-39  |
| SERTAD1      | -2.31448 | 8.18E-62  |
| SERTAD3      | -3.69774 | 3.92E-92  |
| ZNF574       | -2.4767  | 5.20E-84  |
| ZNF526       | -2.79508 | 3.01E-56  |
| DEDD2        | -1.18132 | 2.46E-46  |
| ERF          | -2.23401 | 3.21E-137 |
| CEACAM8      | 2.199418 | 9.99E-05  |
| PHLDB3       | -1.54029 | 3.48E-17  |
| ZNF45        | -1.17118 | 4.35E-09  |
| ZNF221       | -1.93741 | 1.83E-04  |
| ZNF284       | -2.49263 | 6.63E-08  |
| ZNF226       | -2.14859 | 3.81E-27  |
| ZNF235       | -1.52915 | 7.45E-06  |

|          |          |           |
|----------|----------|-----------|
| ZNF112   | -1.75113 | 3.18E-17  |
| ZNF180   | -2.11278 | 5.57E-14  |
| BCL3     | -2.68258 | 1.01E-115 |
| CD3EAP   | -1.00951 | 1.12E-19  |
| PPP1R13L | -1.04732 | 6.08E-30  |
| FBXO46   | -1.79313 | 1.07E-17  |
| SIX5     | -1.20121 | 3.18E-32  |
| IRF2BP1  | -2.16723 | 6.96E-61  |
| NOVA2    | -1.34865 | 2.04E-09  |
| CCDC8    | -2.07833 | 2.85E-119 |
| ARHGAP35 | -1.04378 | 8.80E-116 |
| ZC3H4    | -2.39045 | 1.09E-79  |
| BBC3     | -3.30138 | 3.52E-156 |
| BICRA    | -1.7619  | 1.76E-17  |
| DBP      | -1.17897 | 1.08E-06  |
| PRR12    | -2.08365 | 5.78E-92  |
| NUP62    | -1.00292 | 3.53E-70  |
| ZNF473   | -1.02699 | 3.61E-25  |
| CTU1     | -1.39357 | 2.54E-06  |
| ZNF613   | -2.55152 | 9.19E-13  |
| ZNF350   | -1.20045 | 3.93E-06  |
| ZNF614   | -2.29998 | 2.23E-17  |
| ZNF836   | -2.04456 | 3.70E-08  |
| ZNF616   | -2.77391 | 1.55E-08  |
| ZNF766   | -1.48335 | 2.26E-14  |
| ZNF347   | -1.13817 | 1.92E-04  |
| ZNF331   | -1.95967 | 8.30E-16  |
| MYADM    | -1.13447 | 6.32E-32  |
| LENG1    | -1.31448 | 2.06E-09  |
| KMT5C    | -1.78456 | 7.39E-16  |
| TMEM190  | 1.930871 | 1.60E-14  |
| ZNF628   | -2.70833 | 2.81E-32  |
| ZNF579   | -1.74293 | 3.93E-21  |
| FIZ1     | -1.14713 | 1.34E-13  |
| ZNF524   | -1.58547 | 2.23E-12  |
| ZNF865   | -1.45199 | 2.10E-21  |
| ZNF784   | -2.73209 | 9.17E-28  |
| ZNF581   | -1.8406  | 1.46E-109 |
| CLP1     | -1.97153 | 2.43E-42  |
| ZNF583   | -1.79147 | 6.16E-05  |
| YPEL4    | -2.10406 | 1.84E-04  |
| ZNF71    | -2.61662 | 1.80E-21  |
| ZNF805   | -1.61146 | 1.07E-05  |
| ZNF304   | -1.47315 | 8.51E-11  |

|              |          |           |
|--------------|----------|-----------|
| ZNF547       | -2.48593 | 3.28E-09  |
| ZNF17        | -2.78213 | 7.31E-20  |
| ZNF549       | -1.99759 | 4.73E-18  |
| ZNF211       | -1.58608 | 7.97E-19  |
| ZNF134       | -2.3604  | 4.38E-43  |
| ZNF530       | -1.43313 | 1.68E-04  |
| ZNF416       | -3.77391 | 7.67E-11  |
| LOC103235422 | -2.61146 | 2.31E-35  |
| ZNF586       | -2.3816  | 1.16E-04  |
| LOC103235431 | -2.65844 | 1.96E-22  |
| ZNF551       | -1.97962 | 5.19E-09  |
| ZNF274       | -1.44049 | 3.67E-18  |
| ZNF8         | -2.06913 | 1.66E-16  |
| ZSCAN22      | -2.21752 | 6.62E-11  |
| ZNF837       | -1.28849 | 6.16E-04  |
| ZNF446       | -1.03629 | 4.96E-16  |
| LOC103235452 | -1.88622 | 2.81E-16  |
| ZBTB45       | -1.3227  | 2.18E-25  |
| MZF1         | 1.107441 | 1.65E-08  |
| LOC103235480 | -3.16819 | 7.73E-04  |
| TNKS1BP1     | -1.27981 | 1.45E-106 |
| CEBPG        | -1.46399 | 2.42E-57  |
| ZNF584       | -1.0361  | 1.29E-12  |
| LOC103235581 | -3.34507 | 2.30E-04  |
| CENPC        | -1.13072 | 9.54E-15  |
| REST         | -1.34507 | 1.87E-47  |
| RASL11B      | -2.99715 | 1.59E-17  |
| UTP3         | -1.54158 | 6.44E-63  |
| ANKRD17      | -1.3441  | 4.11E-245 |
| CXCL1        | 1.392843 | 2.15E-05  |
| STBD1        | -1.82071 | 6.67E-136 |
| SHROOM3      | -1.04291 | 2.19E-14  |
| CCNG2        | -2.9045  | 2.34E-163 |
| CNOT6L       | -1.09669 | 1.16E-70  |
| RASGEF1B     | -2.17149 | 1.13E-18  |
| FNBP4        | -1.35639 | 3.40E-70  |
| HELQ         | -1.33853 | 5.26E-19  |
| AFF1         | -1.50685 | 1.03E-46  |
| NAP1L5       | -1.0014  | 6.54E-13  |
| TIGD2        | -1.86702 | 7.11E-16  |
| GPRIN3       | -1.43262 | 7.93E-48  |
| KBTD4        | -1.14226 | 9.45E-42  |
| TET2         | -1.8252  | 6.13E-62  |
| INTS12       | -1.27141 | 9.00E-25  |

|              |          |           |
|--------------|----------|-----------|
| LOC103236086 | -1.1306  | 9.99E-51  |
| SEC24B       | -1.51661 | 1.42E-143 |
| RAPSN        | 2.071576 | 1.57E-05  |
| PITX2        | -1.03167 | 7.31E-12  |
| TRAM1L1      | -1.99041 | 1.85E-05  |
| BBS12        | -3.10406 | 1.81E-45  |
| SPRY1        | -3.25934 | 2.12E-25  |
| ANKRD50      | -2.04235 | 3.04E-130 |
| PLK4         | -1.74694 | 3.81E-95  |
| JADE1        | -2.22756 | 0         |
| PCDH10       | -1.26912 | 7.88E-04  |
| PABPC4L      | -1.88304 | 3.56E-11  |
| NOCT         | -1.72223 | 2.21E-48  |
| ELF2         | -1.82561 | 1.77E-76  |
| RAB33B       | -1.47006 | 2.06E-12  |
| MAML3        | -1.25934 | 1.06E-04  |
| IL15         | -1.52671 | 7.93E-17  |
| USP38        | -1.43304 | 5.92E-66  |
| GAB1         | -1.04152 | 7.89E-25  |
| SMAD1        | -1.21872 | 2.42E-24  |
| MMAA         | -1.22206 | 7.71E-08  |
| LOC103236339 | 2.618403 | 3.93E-04  |
| PRMT9        | -1.39896 | 5.39E-29  |
| LOC103236354 | -1.8327  | 2.30E-47  |
| FHDC1        | -2.76011 | 1.39E-06  |
| LOC103236415 | -1.9378  | 1.05E-52  |
| HARBI1       | -2.56349 | 6.38E-13  |
| GASK1B       | -3.64463 | 2.02E-05  |
| FNIP2        | -1.10406 | 2.92E-20  |
| DUSP8        | -1.99255 | 3.30E-17  |
| CDKN2AIP     | -1.63954 | 3.22E-32  |
| ANKRD37      | -2.3302  | 1.01E-51  |
| CRY2         | -1.11458 | 1.76E-30  |
| CEBPD        | -3.61627 | 0         |
| SNAI2        | -3.71686 | 6.68E-66  |
| TGS1         | -1.14988 | 1.72E-96  |
| PLAG1        | -1.42407 | 1.96E-51  |
| FAM110B      | -1.68026 | 4.21E-08  |
| RRS1         | -1.23344 | 4.83E-28  |
| VCPIP1       | -2.50422 | 1.13E-86  |
| ARFGEF1      | -1.31898 | 1.79E-161 |
| MSC          | -2.64463 | 1.48E-07  |
| ZFHX4        | -1.29115 | 9.02E-17  |
| ZBTB10       | -2.37846 | 8.24E-111 |

|              |          |           |
|--------------|----------|-----------|
| PAG1         | -1.32954 | 1.47E-21  |
| NECAB1       | -1.12576 | 2.09E-09  |
| RUNX1T1      | -1.49616 | 2.82E-119 |
| RBM12B       | -2.08801 | 1.20E-96  |
| PDP1         | -1.14157 | 2.28E-39  |
| GEM          | -1.16241 | 5.44E-62  |
| TP53INP1     | -2.49929 | 1.11E-124 |
| PLEKHF2      | -2.36147 | 1.53E-87  |
| OSR2         | -3.09309 | 1.33E-16  |
| RNF19A       | -1.51221 | 1.31E-89  |
| KLF10        | -2.94528 | 0         |
| RSPO2        | 5.8148   | 1.16E-05  |
| TMEM74       | -1.14852 | 3.51E-12  |
| KCNV1        | -2.11278 | 5.57E-14  |
| TRPS1        | -1.05312 | 4.32E-54  |
| ZHX2         | -1.04157 | 2.95E-24  |
| ZHX1         | -1.02705 | 1.96E-52  |
| FBXO32       | -2.03177 | 0         |
| RNF139       | -2.09529 | 5.63E-190 |
| TRMT12       | -2.25934 | 3.00E-38  |
| SQLE         | -1.53102 | 0         |
| ZNF572       | -1.75797 | 9.13E-15  |
| TRIB1        | -3.66584 | 0         |
| LRATD2       | -2.44729 | 1.58E-29  |
| MYC          | -2.31054 | 0         |
| SLA          | -2.55152 | 1.89E-05  |
| LOC103237505 | 5.442832 | 3.74E-08  |
| CHRAC1       | -1.28383 | 4.93E-60  |
| JRK          | -1.08175 | 3.18E-13  |
| TRAF6        | -2.01095 | 4.12E-61  |
| TIGD5        | -1.81877 | 6.44E-23  |
| ZNF623       | -1.4758  | 1.16E-35  |
| ZNF707       | -1.61245 | 3.07E-08  |
| FAM83H       | -1.51441 | 3.75E-16  |
| NRBP2        | 1.215421 | 1.56E-63  |
| LRRC14       | -1.31008 | 2.42E-16  |
| KIFC2        | 1.167899 | 2.57E-37  |
| FJX1         | -2.31696 | 0         |
| ZNF34        | -1.8305  | 1.27E-18  |
| COMMD5       | -1.29352 | 4.98E-26  |
| ZNF250       | -1.65449 | 8.08E-17  |
| LOC103237660 | -1.49808 | 4.19E-24  |
| KLF6         | -3.43739 | 0         |
| NET1         | -1.32444 | 1.25E-127 |

|              |          |           |
|--------------|----------|-----------|
| IL15RA       | 1.132976 | 8.02E-08  |
| KIN          | -1.37719 | 2.91E-24  |
| EHF          | 1.19589  | 8.11E-08  |
| LOC103237885 | -2.08244 | 3.07E-04  |
| PROSER2      | -1.14377 | 2.98E-19  |
| RPP38        | -1.87729 | 1.16E-41  |
| SKIDA1       | -2.6699  | 6.33E-13  |
| OTUD1        | -2.56349 | 6.38E-13  |
| BAMBI        | -3.44049 | 5.76E-66  |
| MTPAP        | -1.58505 | 2.44E-84  |
| ARHGAP12     | -1.21065 | 1.78E-48  |
| EPC1         | -2.25639 | 2.28E-83  |
| FZD8         | -1.74617 | 2.77E-07  |
| LARP4B       | -1.17694 | 1.74E-57  |
| PRICKLE1     | -2.79041 | 6.21E-147 |
| ARID2        | -1.39068 | 9.29E-54  |
| SLC38A2      | -2.7407  | 0         |
| AMIGO2       | -1.56108 | 3.41E-33  |
| ASB8         | -1.04429 | 2.58E-17  |
| KANSL2       | -1.00668 | 2.74E-62  |
| CCNT1        | -1.49041 | 1.63E-119 |
| TROAP        | -1.30423 | 5.24E-29  |
| PAX6         | -1.53676 | 3.90E-169 |
| METTL7A      | -1.0516  | 1.39E-17  |
| ACVR1B       | -1.58959 | 7.56E-77  |
| GRASP        | -3.03695 | 5.75E-06  |
| NR4A1        | -1.45199 | 6.10E-05  |
| ZNF740       | -1.22192 | 1.90E-47  |
| MFSD5        | -1.4251  | 2.71E-46  |
| SP1          | -1.14685 | 5.11E-112 |
| HOXC13       | -1.52295 | 2.87E-07  |
| HOXC6        | -1.23475 | 3.38E-17  |
| HOXC9        | -1.37567 | 2.75E-18  |
| DNAJC14      | -1.80413 | 8.51E-62  |
| PYM1         | -1.2015  | 1.41E-25  |
| SUOX         | -1.3295  | 2.28E-23  |
| IKZF4        | -1.95156 | 3.56E-21  |
| ZBTB39       | -2.95622 | 2.49E-48  |
| NAB2         | -1.76263 | 1.26E-47  |
| LGR4         | -1.37255 | 7.66E-64  |
| DDIT3        | -1.88519 | 3.20E-40  |
| 9-Mar        | -1.48918 | 5.11E-33  |
| LRIG3        | -1.02155 | 3.35E-20  |
| C11H12orf66  | -1.18294 | 1.56E-22  |



|              |          |           |
|--------------|----------|-----------|
| TBK1         | -1.57408 | 1.53E-44  |
| LEMD3        | -1.88203 | 2.16E-78  |
| HELB         | -1.22959 | 6.33E-05  |
| DYRK2        | -1.94125 | 3.59E-48  |
| MDM2         | -1.53281 | 5.40E-89  |
| FRS2         | -1.31206 | 1.07E-43  |
| PTPRR        | 1.852868 | 4.40E-05  |
| THAP2        | -1.12412 | 5.93E-06  |
| ATXN7L3B     | -1.81094 | 7.53E-203 |
| PHLDA1       | -2.32575 | 0         |
| BBS10        | -1.35947 | 1.07E-13  |
| E2F7         | -1.72674 | 1.75E-128 |
| ALX1         | -2.10406 | 5.51E-13  |
| KITLG        | 1.048187 | 3.04E-05  |
| DUSP6        | -3.02844 | 2.11E-197 |
| GALNT4       | -1.41362 | 2.68E-32  |
| BTG1         | -2.66334 | 0         |
| NUDT4        | -1.26825 | 1.29E-145 |
| TMCC3        | -1.27468 | 6.48E-11  |
| APAF1        | -1.39595 | 5.22E-23  |
| E2F8         | -2.25566 | 1.10E-132 |
| TCP11L2      | -2.10406 | 1.57E-15  |
| MTERF2       | -1.04863 | 4.41E-07  |
| FICD         | -1.10078 | 3.13E-14  |
| TMEM86A      | -1.443   | 2.15E-08  |
| LOC103239100 | -1.03185 | 7.14E-05  |
| SPTY2D1      | -1.3912  | 2.71E-68  |
| B4GALNT4     | 1.031139 | 2.27E-61  |
| TBX3         | -2.35833 | 2.76E-59  |
| BICDL1       | -1.05685 | 3.60E-125 |
| SETD1B       | -2.42927 | 1.38E-41  |
| BCL7A        | -1.08405 | 1.53E-11  |
| RSRC2        | -1.17177 | 2.05E-54  |
| VPS37B       | -1.41282 | 3.77E-78  |
| C11H12orf65  | -1.1448  | 2.94E-14  |
| SNRNP35      | -1.65958 | 3.08E-28  |
| ZNF10        | -1.36548 | 1.45E-08  |
| ZCCHC8       | -1.74042 | 1.63E-63  |
| ZMYND19      | -1.11473 | 1.15E-17  |
| TOR4A        | -1.18379 | 3.46E-04  |
| TPRN         | -1.34613 | 3.97E-29  |
| C12H9orf139  | 2.342949 | 3.44E-04  |
| NOTCH1       | -1.69462 | 7.21E-113 |
| SOX6         | -1.11909 | 4.19E-38  |

|              |          |           |
|--------------|----------|-----------|
| C12H9orf116  | -1.13179 | 1.06E-16  |
| PPP1R26      | -1.00449 | 1.95E-77  |
| RALGDS       | -2.01547 | 1.19E-88  |
| GTF3C4       | -1.59043 | 1.79E-57  |
| FAM78A       | -1.03695 | 6.63E-04  |
| PRDM12       | -1.65958 | 1.62E-06  |
| IER5L        | -3.47982 | 2.53E-83  |
| DOLK         | -1.29807 | 1.11E-18  |
| LRRC8A       | -1.44244 | 1.05E-21  |
| FAM102A      | -1.53892 | 1.44E-52  |
| ZNF79        | -1.68211 | 5.29E-10  |
| ZBTB34       | -2.96656 | 1.25E-05  |
| ZBTB43       | -2.31706 | 3.00E-23  |
| ZBTB6        | -2.07442 | 4.08E-63  |
| ZBTB26       | -2.15098 | 5.12E-11  |
| TENT5A       | -1.75083 | 1.85E-10  |
| TPBG         | -1.63094 | 5.01E-150 |
| RWDD2A       | -1.26912 | 4.99E-08  |
| LOC103240069 | -2.09983 | 3.03E-27  |
| CNR1         | -2.37799 | 5.05E-13  |
| PNRC1        | -3.5411  | 0         |
| CASP8AP2     | -1.49086 | 1.63E-24  |
| BACH2        | -1.45199 | 6.45E-06  |
| EPHA7        | -1.40949 | 1.99E-151 |
| LOC103240143 | 1.516875 | 8.02E-04  |
| LATS1        | -1.5097  | 5.25E-21  |
| LOC103240189 | -1.61864 | 5.16E-10  |
| FBXO30       | -1.76247 | 6.02E-26  |
| CITED2       | -3.30575 | 0         |
| TNFAIP3      | -1.20578 | 1.17E-69  |
| SLC35D3      | 2.525294 | 1.68E-05  |
| SGK1         | -2.87559 | 2.36E-38  |
| SLC2A12      | -1.16489 | 3.12E-08  |
| ADM          | -5.54187 | 5.69E-98  |
| THEMIS       | 3.525294 | 4.14E-04  |
| RNF217       | -1.60896 | 1.93E-37  |
| WEE1         | -2.79496 | 2.72E-134 |
| MCM9         | -1.82624 | 6.80E-25  |
| RSPH4A       | -1.70352 | 5.79E-04  |
| TSPYL1       | -1.54244 | 9.07E-85  |
| MARCKS       | -1.42159 | 3.06E-114 |
| REV3L        | -1.19466 | 8.66E-43  |
| ZBTB24       | -3.0516  | 8.85E-36  |
| SESN1        | -2.26845 | 1.24E-61  |

|              |          |           |
|--------------|----------|-----------|
| FOXO3        | -1.31613 | 3.23E-86  |
| CD24         | -2.27101 | 0         |
| ZBTB2        | -1.90516 | 1.81E-24  |
| SYNE1        | -1.04186 | 1.78E-71  |
| FBXO5        | -2.37288 | 2.10E-99  |
| SCAF8        | -1.61707 | 2.30E-107 |
| TULP4        | -1.06174 | 9.54E-34  |
| PRKN         | 1.305183 | 2.00E-12  |
| FAM120B      | -1.00381 | 1.77E-49  |
| LOC103241052 | -3.96656 | 7.76E-07  |
| ZNF2         | -3.44337 | 8.78E-23  |
| ITPRIPL1     | -1.07945 | 1.42E-14  |
| NEURL3       | -1.89256 | 3.46E-06  |
| ANKRD23      | -1.05967 | 3.28E-04  |
| SEMA4C       | -1.3099  | 8.19E-26  |
| LOC103241090 | -3.22959 | 5.16E-04  |
| LIPT1        | -1.49707 | 3.39E-04  |
| C14H2orf49   | -1.17793 | 1.81E-39  |
| SOWAHC       | -2.48593 | 1.78E-29  |
| CKAP2L       | -1.50244 | 4.28E-207 |
| LOC103241298 | -2.81456 | 5.87E-05  |
| EIF2AK3      | -1.47866 | 5.59E-76  |
| SHOX2        | -1.06106 | 7.12E-11  |
| CCNL1        | -1.35675 | 4.66E-68  |
| TIPARP       | -2.35851 | 6.61E-260 |
| ARHGEF26     | -1.41942 | 7.52E-11  |
| RAP2B        | -2.2149  | 2.25E-73  |
| P2RY1        | -2.03236 | 1.09E-12  |
| SIAH2        | -1.79511 | 3.95E-47  |
| TSC22D2      | -2.63942 | 2.33E-168 |
| DIPK2A       | -1.00633 | 1.84E-31  |
| ZBTB38       | -1.00106 | 2.60E-95  |
| PXYLP1       | -1.21617 | 7.73E-35  |
| NCK1         | -1.12506 | 1.60E-22  |
| MSL2         | -2.13357 | 1.22E-78  |
| AMOTL2       | -2.81954 | 0         |
| ASTE1        | -1.54275 | 2.32E-09  |
| SATB1        | -1.14952 | 6.40E-27  |
| NR1D2        | -1.13675 | 1.98E-66  |
| OXSM         | -1.22959 | 6.12E-48  |
| EOMES        | -1.90097 | 6.76E-07  |
| TGFBR2       | -1.22462 | 4.55E-114 |
| LOC103241812 | -2.55152 | 2.65E-11  |
| BCL6         | -2.5347  | 1.00E-99  |

|              |          |           |
|--------------|----------|-----------|
| GMNC         | -2.48593 | 3.93E-05  |
| MB21D2       | -1.32148 | 1.36E-38  |
| HES1         | -2.90874 | 4.39E-61  |
| FAM43A       | -1.58379 | 9.00E-23  |
| LOC103241951 | -4.7673  | 1.44E-06  |
| WDR53        | -1.52455 | 3.16E-14  |
| RNF168       | -1.37614 | 4.73E-16  |
| LOC103242077 | -1.49012 | 1.37E-06  |
| GEMIN4       | -1.65148 | 5.45E-48  |
| C16H17orf97  | -2.13402 | 1.43E-12  |
| TLCD2        | -1.13402 | 1.17E-05  |
| SCARF1       | 2.347008 | 6.12E-157 |
| MNT          | -1.50024 | 3.87E-23  |
| HASPIN       | -2.95967 | 1.70E-48  |
| SMTNL2       | -1.35965 | 4.26E-30  |
| ZFP3         | -1.62552 | 2.10E-17  |
| ZNF594       | -1.95691 | 5.08E-22  |
| MIS12        | -1.77464 | 9.01E-32  |
| SLC16A13     | -1.02114 | 1.67E-12  |
| PHF23        | -2.54348 | 9.34E-140 |
| KCTD11       | -2.59505 | 2.44E-114 |
| TMEM102      | -1.5336  | 4.51E-21  |
| KDM6B        | -1.94185 | 2.73E-37  |
| PER1         | -2.08481 | 8.55E-41  |
| BORCS6       | -2.77708 | 1.34E-49  |
| SOX18        | -2.50261 | 1.34E-06  |
| ADPRM        | -1.09953 | 7.98E-06  |
| ZNF18        | -1.63641 | 2.66E-20  |
| HS3ST3A1     | -1.13408 | 2.95E-39  |
| HS3ST3B1     | -2.42933 | 1.70E-154 |
| MED9         | -1.48188 | 1.99E-40  |
| RAI1         | -1.24093 | 4.59E-38  |
| ALKBH5       | -1.06672 | 1.07E-80  |
| GID4         | -1.22084 | 3.09E-53  |
| MIEF2        | -1.8825  | 9.59E-68  |
| SMCR8        | -1.92445 | 9.22E-50  |
| FAM83G       | -1.39465 | 3.89E-17  |
| MAPK7        | -2.04541 | 5.32E-71  |
| AKAP10       | -1.66719 | 1.46E-55  |
| NATD1        | -1.48709 | 5.00E-11  |
| LOC103242566 | -1.00218 | 3.23E-04  |
| GMEB2        | -1.09268 | 3.38E-27  |
| RSKR         | 1.177831 | 1.40E-22  |
| PROCA1       | 1.174796 | 6.80E-05  |

|              |          |           |
|--------------|----------|-----------|
| FAM222B      | -2.33409 | 2.31E-81  |
| PHF12        | -1.62445 | 4.27E-163 |
| NUFIP2       | -1.06679 | 4.53E-257 |
| CORO6        | 1.20629  | 4.69E-36  |
| SSH2         | -1.1178  | 5.99E-27  |
| TEFM         | -1.16819 | 1.70E-18  |
| CDK5R1       | -1.83531 | 1.24E-14  |
| LOC103242710 | 1.193401 | 6.80E-10  |
| ZNF830       | -3.24633 | 4.27E-76  |
| SLFN5        | -1.95852 | 1.09E-13  |
| SLFN12       | -1.9825  | 1.37E-07  |
| PEX12        | -1.23686 | 1.38E-22  |
| CCL5         | 2.988353 | 6.38E-13  |
| HNF1B        | -1.98102 | 0         |
| LHX1         | -2.66705 | 0         |
| GGNBP2       | -1.42089 | 2.21E-144 |
| PPM1D        | -2.23286 | 0         |
| MED13        | -1.27731 | 1.34E-188 |
| PTRH2        | -1.09462 | 1.94E-39  |
| YPEL2        | -2.08002 | 2.90E-37  |
| SMG8         | -2.27127 | 4.33E-153 |
| MTMR4        | -1.1021  | 7.37E-166 |
| VEZF1        | -1.75477 | 1.35E-224 |
| YTHDF1       | -2.21023 | 1.57E-122 |
| COIL         | -1.60078 | 1.36E-128 |
| TOB1         | -3.07609 | 1.42E-153 |
| COL1A1       | -3.34507 | 5.40E-11  |
| DIDO1        | -1.54297 | 7.99E-120 |
| SGCA         | -1.17806 | 9.74E-05  |
| TNRC6C       | -1.04673 | 1.64E-23  |
| JMJD6        | -1.12842 | 2.53E-50  |
| QRICH2       | 4.162724 | 2.20E-06  |
| FOXJ1        | -1.0709  | 9.28E-05  |
| TRIM47       | -1.25231 | 1.14E-38  |
| OTOP2        | 2.618403 | 3.93E-04  |
| GPRC5C       | -1.26005 | 1.54E-123 |
| SSTR2        | 2.014432 | 1.03E-06  |
| CDC42EP4     | -2.31775 | 1.57E-46  |
| GNA13        | -1.77281 | 0         |
| TLK2         | -1.02727 | 1.59E-66  |
| KANSL1       | -1.93023 | 3.05E-258 |
| MAP3K14      | -1.58423 | 3.93E-202 |
| HEXIM2       | -1.39187 | 2.95E-11  |
| HEXIM1       | -1.56685 | 5.60E-233 |

|              |          |           |
|--------------|----------|-----------|
| KIF18B       | -1.28682 | 1.95E-42  |
| PPP1R3D      | -3.03695 | 4.48E-23  |
| FAM217B      | -1.38255 | 8.91E-23  |
| GJC1         | -1.02719 | 1.43E-31  |
| FZD2         | -2.48095 | 0         |
| C16H17orf53  | -1.44439 | 2.46E-44  |
| ARL4D        | -2.84103 | 4.43E-07  |
| RUNDC1       | -1.12763 | 5.58E-24  |
| PLEKHH3      | -1.37991 | 1.25E-28  |
| RETREG3      | -1.72158 | 4.95E-118 |
| KRT19        | -1.19185 | 3.39E-15  |
| LOC103243474 | 1.525294 | 1.21E-05  |
| LOC103243485 | -2.0709  | 2.57E-04  |
| GJD3         | -1.31923 | 2.27E-04  |
| RARA         | -1.16707 | 2.46E-43  |
| NR1D1        | -2.50813 | 5.30E-51  |
| GRB7         | -2.00324 | 3.76E-125 |
| PLXDC1       | -1.37502 | 3.69E-04  |
| CWC25        | -1.20491 | 4.18E-35  |
| EPOP         | -1.18742 | 4.93E-17  |
| SP2          | -1.11434 | 3.84E-31  |
| HOXB5        | -1.62326 | 6.76E-23  |
| HOXB4        | -1.00818 | 1.50E-06  |
| HOXB8        | -1.88014 | 4.81E-28  |
| IGF2BP1      | -1.84627 | 4.76E-04  |
| ZNF652       | -1.36485 | 6.98E-12  |
| SOCS3        | -4.54348 | 4.80E-167 |
| CANT1        | -1.12098 | 8.39E-222 |
| CBX2         | -1.49834 | 2.59E-13  |
| CBX8         | -2.46372 | 3.40E-47  |
| CBX4         | -2.25633 | 6.76E-102 |
| PCK1         | -2.93741 | 3.62E-23  |
| TEX19        | -2.0852  | 6.99E-07  |
| BMP7         | 1.36763  | 4.14E-09  |
| METRNL       | -1.80562 | 1.20E-41  |
| TFAP2C       | -1.75316 | 1.26E-13  |
| TAOK1        | -1.12053 | 1.10E-136 |
| OXLD1        | -1.43313 | 1.68E-04  |
| CASS4        | -1.86702 | 9.18E-05  |
| AURKA        | -1.24149 | 7.57E-138 |
| CSTF1        | -1.58516 | 2.25E-53  |
| MC3R         | -2.96656 | 9.42E-15  |
| PHF3         | -1.27468 | 5.93E-114 |
| KIAA1586     | -1.04222 | 8.09E-05  |

|              |          |           |
|--------------|----------|-----------|
| FAM83B       | -2.47752 | 1.92E-06  |
| ADNP2        | -2.92098 | 3.49E-179 |
| NFATC1       | -1.05626 | 7.26E-17  |
| ZNF217       | -3.13292 | 1.86E-267 |
| ZNF407       | -1.15559 | 1.60E-19  |
| TIMM21       | -1.52619 | 2.99E-75  |
| SOCS6        | -2.40254 | 4.26E-66  |
| DSEL         | -2.02417 | 2.54E-42  |
| BCL2         | -1.49646 | 0         |
| PHLPP1       | -1.20323 | 5.64E-74  |
| ZCCHC2       | -1.61966 | 4.13E-66  |
| ZFP64        | -1.12145 | 1.56E-16  |
| MALT1        | -1.67599 | 0         |
| NFATC2       | -1.17188 | 2.64E-04  |
| ONECUT2      | -1.75769 | 3.48E-13  |
| RGMB         | -2.29292 | 4.32E-15  |
| CHD1         | -1.29731 | 2.25E-120 |
| MOCS3        | -2.17301 | 3.43E-25  |
| GIN1         | -1.55152 | 8.04E-15  |
| C23H5orf30   | -1.00274 | 1.12E-17  |
| ADNP         | -1.99186 | 3.20E-299 |
| EPB41L4A     | -1.19866 | 1.80E-67  |
| PAR6B        | -3.53772 | 2.87E-56  |
| LOC103244341 | -1.33765 | 5.11E-05  |
| FEM1C        | -2.96222 | 2.51E-114 |
| SEMA6A       | -1.68272 | 0         |
| TNFAIP8      | -1.41875 | 4.69E-43  |
| ZNF608       | -2.46055 | 7.49E-80  |
| CEBPB        | -3.65675 | 0         |
| GRAMD2B      | -1.72709 | 1.13E-26  |
| FNIP1        | -1.54709 | 7.03E-67  |
| IL5          | 2.355369 | 8.93E-04  |
| IRF1         | -1.49647 | 1.80E-26  |
| SPATA2       | -2.21014 | 1.82E-55  |
| FSTL4        | -1.33651 | 1.77E-04  |
| JADE2        | -1.16744 | 2.02E-32  |
| B4GALT5      | -1.09035 | 1.32E-76  |
| LOC103244556 | -1.03728 | 1.43E-30  |
| SLC25A48     | 1.644875 | 3.56E-04  |
| EGR1         | -3.03367 | 1.54E-154 |
| BRD8         | -1.15299 | 8.92E-110 |
| CXXC5        | -1.00873 | 2.04E-151 |
| IGIP         | -1.2533  | 2.06E-39  |
| TAF7         | -1.06817 | 4.28E-148 |

|              |          |           |
|--------------|----------|-----------|
| NR3C1        | -1.29477 | 5.45E-79  |
| ZMYND8       | -1.10213 | 3.42E-68  |
| RBM27        | -1.27138 | 3.05E-93  |
| FBXO38       | -1.08474 | 5.09E-66  |
| ADRB2        | -3.08233 | 1.72E-195 |
| PCYOX1L      | -1.69807 | 1.56E-26  |
| PPARGC1B     | -2.61345 | 2.97E-179 |
| TIGD6        | -2.06053 | 4.11E-09  |
| CNOT8        | -1.07205 | 1.11E-54  |
| MED7         | -1.74678 | 1.32E-48  |
| TP53RK       | -1.52539 | 4.51E-20  |
| RNF145       | -1.79737 | 1.14E-220 |
| PWWP2A       | -1.02282 | 1.15E-24  |
| CCNJL        | -1.1452  | 5.74E-17  |
| ZBED8        | -1.34791 | 1.49E-11  |
| ZNF334       | -1.1941  | 1.13E-10  |
| LOC103244958 | -2.40884 | 5.01E-06  |
| TLX3         | -1.84103 | 1.25E-04  |
| FGF18        | -1.93741 | 1.83E-04  |
| NEURL1B      | -1.13854 | 1.78E-20  |
| DUSP1        | -2.76235 | 2.96E-251 |
| MSX2         | -2.92592 | 9.91E-21  |
| HK3          | 2.878931 | 1.38E-07  |
| UIMC1        | -1.02287 | 1.75E-29  |
| CLK4         | -1.69004 | 7.33E-42  |
| NCOA5        | -2.01417 | 6.20E-118 |
| ZNF354B      | -1.0733  | 9.48E-04  |
| ZNF879       | -3.4943  | 7.97E-24  |
| LOC103245129 | -2.29998 | 1.64E-06  |
| ZFP62        | -1.33011 | 1.34E-43  |
| LOC103245175 | -3.22959 | 5.16E-04  |
| ZSWIM1       | -2.29292 | 4.98E-43  |
| MEX3B        | -1.93003 | 9.63E-04  |
| IREB2        | -1.58188 | 6.35E-187 |
| ZSWIM3       | -2.21538 | 1.02E-17  |
| ISL2         | -1.14713 | 1.62E-06  |
| WFDC3        | 1.236724 | 2.74E-04  |
| SIN3A        | -1.7165  | 6.31E-231 |
| IMP3         | -1.52756 | 3.30E-32  |
| SNX33        | -1.54275 | 7.12E-26  |
| C26H15orf39  | -2.5455  | 3.01E-24  |
| SEMA7A       | -1.30382 | 0         |
| PML          | -1.29069 | 1.88E-165 |
| SENP8        | -1.57624 | 8.19E-12  |



|              |          |           |
|--------------|----------|-----------|
| LARP6        | -1.18292 | 1.92E-18  |
| KIF23        | -1.03895 | 1.86E-84  |
| SPESP1       | -1.71353 | 1.06E-23  |
| FEM1B        | -2.35532 | 2.33E-176 |
| PIAS1        | -1.19246 | 4.13E-57  |
| C26H15orf61  | -1.44355 | 1.14E-16  |
| PLEKHO2      | -1.75626 | 5.31E-54  |
| PIF1         | -1.00669 | 1.84E-11  |
| CGNL1        | -1.21211 | 1.52E-52  |
| RFX7         | -1.0806  | 4.55E-93  |
| OSER1        | -2.0096  | 1.79E-107 |
| BLOC1S6      | 1.864825 | 0         |
| LCMT2        | -1.43051 | 4.16E-10  |
| ZSCAN29      | -1.67631 | 1.85E-62  |
| TTBK2        | -1.00838 | 2.78E-28  |
| FADD         | -1.48593 | 1.88E-15  |
| SPTBN5       | 1.026532 | 1.25E-09  |
| MGA          | -1.13006 | 1.97E-67  |
| CHAC1        | -1.94231 | 2.07E-13  |
| VPS18        | -1.66135 | 1.20E-88  |
| C26H15orf62  | -2.32646 | 8.15E-08  |
| RPUSD2       | -2.1757  | 1.41E-47  |
| CCDC32       | -1.31532 | 1.81E-13  |
| INAFM2       | -1.03624 | 6.79E-15  |
| BMF          | -3.0297  | 0         |
| PGBD4        | -2.47752 | 1.92E-06  |
| FMN1         | -1.02281 | 1.11E-160 |
| NSMCE3       | -1.28194 | 2.71E-51  |
| GABRA5       | -1.26912 | 4.99E-08  |
| FAM83D       | -2.61535 | 1.02E-88  |
| TEC          | -1.34765 | 1.27E-12  |
| DCAF4L1      | -1.13006 | 1.46E-04  |
| LOC103246172 | 2.293968 | 3.89E-06  |
| TLR1         | -2.45199 | 5.66E-05  |
| KLF3         | -2.22858 | 6.83E-238 |
| DCAF16       | -1.16072 | 1.03E-27  |
| FBXL5        | -1.16204 | 2.60E-79  |
| CPEB2        | -1.04222 | 8.09E-05  |
| HS3ST1       | -2.8155  | 0         |
| ZNF518B      | -2.35641 | 2.27E-46  |
| ZBTB49       | -1.83446 | 3.33E-15  |
| MSX1         | -1.18068 | 7.40E-09  |
| C27H4orf50   | -1.81456 | 3.43E-30  |
| MRFAP1L1     | -1.30608 | 2.84E-38  |

|              |          |           |
|--------------|----------|-----------|
| BLOC1S4      | -1.34285 | 1.24E-27  |
| KIAA0232     | -1.5875  | 5.47E-96  |
| CCDC96       | -2.14713 | 9.58E-04  |
| TADA2B       | -2.05382 | 1.32E-68  |
| TRMT44       | -1.19112 | 3.65E-16  |
| HAUS3        | -1.33211 | 2.68E-12  |
| JAG1         | -1.05967 | 4.30E-10  |
| LOC103246525 | -1.02806 | 3.96E-11  |
| KCTD7        | -1.10268 | 2.26E-32  |
| LOC103246604 | -2.15559 | 1.30E-05  |
| AUTS2        | -1.87217 | 2.64E-131 |
| CASTOR2      | -1.12436 | 1.20E-28  |
| STX1A        | 1.076521 | 9.81E-56  |
| DNAJC30      | -1.26122 | 7.23E-44  |
| VPS37D       | -1.16489 | 1.22E-04  |
| ALKBH4       | -1.86483 | 6.47E-30  |
| UFSP1        | -1.52794 | 1.15E-14  |
| POP7         | -1.21036 | 3.49E-32  |
| BMP2         | -2.02194 | 1.30E-18  |
| MEPCE        | -1.568   | 3.93E-176 |
| ZSCAN21      | -1.23508 | 6.15E-39  |
| ZNF3         | -2.26815 | 1.45E-84  |
| ZSCAN25      | -2.01809 | 2.05E-34  |
| FAM200A      | -1.79557 | 5.62E-20  |
| ZNF394       | -2.40082 | 2.83E-51  |
| USP42        | -2.68903 | 2.46E-157 |
| ZNF12        | -2.08757 | 3.17E-54  |
| FBXL18       | -1.46663 | 5.47E-15  |
| TNRC18       | -1.25489 | 1.40E-81  |
| FOXK1        | -1.57112 | 4.08E-93  |
| TMEM184A     | -1.70352 | 5.79E-04  |
| GPR146       | -2.1592  | 7.36E-14  |
| TMEM230      | 2.428532 | 0         |
| ZFY          | -1.41838 | 2.85E-06  |
| NANP         | -1.82007 | 8.74E-18  |
| LOC103247079 | 2.523019 | 1.54E-20  |
| ZNF419       | -2.29769 | 2.60E-04  |
| NOA1         | 1.038933 | 1.59E-38  |
| BOLA1        | -2.12145 | 3.87E-53  |
| FASTKD5      | -1.37468 | 2.01E-33  |
| CIART        | -2.16629 | 2.09E-31  |
| MCL1         | -2.09018 | 0         |
| GOLPH3L      | -1.04386 | 2.15E-38  |
| CTSK         | 1.219164 | 3.38E-10  |

|              |          |           |
|--------------|----------|-----------|
| RPRD2        | -1.62102 | 2.44E-132 |
| BCL9         | -1.38138 | 1.32E-95  |
| NKRF         | -2.0297  | 1.47E-59  |
| RNF113A      | -1.28509 | 3.97E-05  |
| ZBTB33       | -1.37169 | 1.15E-27  |
| ADAM33       | 1.30353  | 4.60E-42  |
| CENPB        | -1.16411 | 1.21E-61  |
| LOC103247559 | -1.75075 | 2.59E-10  |
| ZCCHC3       | -2.64177 | 1.27E-102 |
| LOC103247767 | -2.40437 | 1.25E-14  |
| SOX12        | -1.53548 | 2.28E-79  |
| LOC103247796 | -1.22959 | 6.33E-05  |
| LOC103247810 | -1.93003 | 9.63E-04  |
| LOC103247823 | -1.46764 | 1.03E-04  |
| LOC103247851 | -1.52548 | 7.34E-10  |
| TRIM68       | -1.46585 | 1.62E-25  |
| TRIM21       | -1.71609 | 1.18E-32  |
| RHOG         | -1.36432 | 1.20E-70  |
| CHRNA10      | 5.162724 | 6.11E-04  |
| ID1          | -2.15708 | 5.82E-32  |
| LOC103248030 | -1.1529  | 1.03E-09  |
| LIPT2        | -1.93086 | 3.21E-13  |
| RNF169       | -1.71671 | 2.49E-61  |
| EMSY         | -1.51147 | 5.19E-41  |
| LRRC32       | -1.88655 | 2.14E-145 |
| TSKU         | -2.19156 | 9.06E-196 |
| B3GNT6       | 6.262259 | 2.69E-07  |
| RSF1         | -1.22959 | 1.29E-82  |
| THRSP        | -1.87636 | 1.13E-21  |
| KCTD21       | -1.41104 | 3.43E-30  |
| RAB30        | -1.58805 | 1.30E-11  |
| PCF11        | -2.58622 | 0         |
| LOC103248152 | -4.72784 | 2.10E-06  |
| CREBZF       | -1.35558 | 1.55E-72  |
| LOC103248163 | -2.12702 | 5.80E-16  |
| PLAGL2       | -1.61042 | 8.44E-75  |
| FZD4         | -1.45511 | 1.75E-22  |
| LOC103248202 | -1.20406 | 6.15E-05  |
| ASXL1        | -1.83656 | 1.10E-299 |
| NOL4L        | -1.26188 | 1.47E-19  |
| MED17        | -1.18102 | 1.98E-29  |
| ANKRD49      | -1.67949 | 1.47E-22  |
| FUT4         | -1.58949 | 3.97E-05  |
| KDM4D        | -1.14713 | 1.62E-06  |

|              |          |           |
|--------------|----------|-----------|
| MAML2        | -1.38392 | 5.74E-10  |
| JRKL         | -1.64109 | 1.62E-23  |
| MSANTD4      | -1.96271 | 8.46E-54  |
| RAB39A       | -1.71704 | 6.73E-18  |
| NPAT         | -1.60968 | 9.80E-80  |
| EXPH5        | -2.18942 | 2.39E-84  |
| ZC3H12C      | -1.1731  | 4.81E-40  |
| RBM7         | -1.18607 | 5.50E-77  |
| BUD13        | -1.72555 | 1.23E-59  |
| APOA1        | 3.525294 | 4.14E-04  |
| SCN2B        | 1.746854 | 6.58E-05  |
| KMT2A        | -1.86494 | 0         |
| PHLDB1       | -1.05181 | 0         |
| DDX6         | -1.47027 | 7.18E-113 |
| BCL9L        | -1.79159 | 0         |
| HINFP        | -1.08474 | 4.26E-14  |
| RNF26        | -1.20424 | 6.82E-159 |
| GRAMD1B      | -1.05882 | 5.88E-17  |
| ZNF202       | -1.91644 | 3.94E-28  |
| HYLS1        | -1.45896 | 2.40E-20  |
| PUS3         | -1.43905 | 2.44E-31  |
| KIRREL3      | 1.548014 | 3.20E-05  |
| NCOA6        | -1.07809 | 3.48E-51  |
| KCNJ1        | -1.36249 | 2.59E-06  |
| ADAMTS15     | -1.20757 | 1.38E-05  |
| LOC103248979 | -1.57537 | 3.12E-04  |
| TNFRSF19     | -1.43206 | 2.47E-150 |
| TAF4         | -1.79728 | 2.99E-32  |
| ZNFX1        | -1.58973 | 1.06E-53  |
| RASL11A      | -1.03165 | 9.82E-16  |

---

| Gene Symbol | log2(SADS-CoV_24h/Control_24h) | Qvalue(SADS-CoV_24h/Control_24h) |
|-------------|--------------------------------|----------------------------------|
| UBL3        | -1.71576                       | 9.43E-128                        |
| USPL1       | -1.75725                       | 1.78E-71                         |
| MEDAG       | -3.03587                       | 7.64E-04                         |
| BRCA2       | -1.23576                       | 4.99E-30                         |
| FRY         | -1.03179                       | 2.00E-10                         |
| N4BP2L1     | -1.36071                       | 2.93E-11                         |
| STARD13     | -2.25682                       | 0                                |
| PDS5B       | -1.40333                       | 7.50E-96                         |
| N4BP2L2     | -1.90079                       | 9.89E-90                         |
| SERTM1      | -1.47328                       | 4.12E-04                         |
| LHFPL6      | 1.014755                       | 1.76E-05                         |
| FOXO1       | -3.88275                       | 2.84E-72                         |
| ELF1        | -1.8485                        | 3.46E-70                         |
| KBTBD6      | -1.34606                       | 6.23E-09                         |
| KBTBD7      | -3.25017                       | 2.89E-21                         |
| NAA16       | -1.33133                       | 4.46E-17                         |
| TSC22D1     | -2.75479                       | 0                                |
| COG3        | -2.47328                       | 9.39E-84                         |
| ZC3H13      | -1.78133                       | 7.99E-82                         |
| LRCH1       | -1.67714                       | 9.93E-36                         |
| HTR2A       | -3.07662                       | 3.09E-46                         |
| MED4        | -2.80751                       | 4.05E-80                         |
| ARL11       | -1.07913                       | 4.24E-09                         |
| KCNRG       | -3.84323                       | 6.26E-07                         |
| TRIM13      | -2.45091                       | 4.60E-17                         |
| INTS6       | -1.61495                       | 1.77E-46                         |
| UTP14C      | -1.78144                       | 4.50E-37                         |
| ALG11       | -1.82917                       | 5.04E-57                         |
| THSD1       | -2.67825                       | 1.68E-49                         |
| FLRT3       | -4.65731                       | 0                                |
| TDRD3       | -1.09257                       | 2.41E-15                         |
| PCDH9       | -1.92221                       | 5.78E-66                         |
| DACH1       | -2.27957                       | 2.26E-29                         |
| BORA        | -1.81938                       | 8.55E-79                         |
| KLF5        | -3.42525                       | 1.62E-154                        |
| KIF16B      | -1.2778                        | 6.83E-64                         |
| KLF12       | -1.18209                       | 5.16E-12                         |
| FBXL3       | -1.16538                       | 6.56E-39                         |
| CLN5        | -1.10566                       | 3.89E-64                         |
| RNF219      | -2.71525                       | 1.09E-45                         |
| SPRY2       | -5.16858                       | 9.51E-198                        |

|              |          |           |
|--------------|----------|-----------|
| LOC103214626 | 1.58357  | 8.29E-05  |
| SLITRK5      | -2.70824 | 0         |
| DCT          | -2.15135 | 3.39E-07  |
| ZIC5         | -1.28098 | 2.76E-08  |
| ZIC2         | -3.58184 | 1.11E-114 |
| EFNB2        | -3.27109 | 3.75E-137 |
| LIG4         | -1.38532 | 8.10E-30  |
| ABHD13       | -2.27444 | 1.49E-67  |
| IRS2         | -3.79776 | 1.15E-182 |
| COL4A1       | -1.06748 | 0         |
| ING1         | -3.28018 | 3.24E-97  |
| LOC103214847 | -2.62083 | 5.98E-10  |
| ZNF133       | -3.12167 | 3.16E-51  |
| CHAMP1       | -3.35663 | 2.39E-152 |
| LRRC14B      | -4.0055  | 8.58E-08  |
| CCDC127      | -2.14817 | 4.86E-36  |
| AHRR         | -1.62542 | 5.63E-117 |
| SLC9A3       | -1.21246 | 3.87E-67  |
| SLC6A18      | -2.53837 | 1.44E-07  |
| TERT         | 1.299113 | 2.99E-05  |
| LPCAT1       | -1.39444 | 3.34E-42  |
| ICE1         | -1.65268 | 3.97E-112 |
| FASTKD3      | -1.6128  | 7.05E-20  |
| LOC103214994 | -1.28569 | 5.94E-19  |
| ATPCKMT      | -2.17883 | 2.59E-05  |
| CMBL         | 5.30184  | 8.85E-20  |
| ANKRD33B     | -2.65444 | 6.70E-61  |
| OTULINL      | -1.42706 | 4.20E-22  |
| ZNF622       | -1.811   | 3.57E-62  |
| CDH6         | -1.57205 | 0         |
| RIN2         | -2.00037 | 1.51E-40  |
| GOLPH3       | -2.30101 | 0         |
| MTMR12       | -1.03262 | 8.52E-13  |
| NPR3         | -1.08077 | 2.53E-11  |
| DNAJC21      | -1.71372 | 3.39E-150 |
| CFAP61       | -1.11064 | 5.96E-10  |
| NIPBL        | -1.05355 | 8.15E-99  |
| GDNF         | -2.28741 | 1.24E-42  |
| RICTOR       | -1.17219 | 1.14E-63  |
| DAB2         | -1.11483 | 1.45E-194 |
| PTGER4       | -3.4051  | 6.00E-09  |
| PRKAA1       | -1.02713 | 1.58E-22  |
| CARD6        | -2.38101 | 3.32E-50  |
| C4H5orf51    | -1.19623 | 3.60E-83  |

|              |          |           |
|--------------|----------|-----------|
| NIM1K        | -2.09861 | 3.05E-15  |
| ZNF131       | -1.47385 | 1.44E-44  |
| HMGCS1       | -4.06096 | 0         |
| C4H5orf34    | -1.40138 | 6.60E-34  |
| LOC103215245 | -2.56192 | 1.87E-09  |
| ZNF596       | -1.6733  | 1.57E-13  |
| MYOM2        | -1.78533 | 3.52E-15  |
| KBTBD11      | -1.90749 | 1.56E-67  |
| LOC103215277 | -1.3578  | 8.61E-05  |
| KMT5B        | -2.4051  | 1.39E-134 |
| MCPH1        | -1.4051  | 1.47E-27  |
| XKR5         | -1.03587 | 3.87E-04  |
| FDFT1        | -1.06389 | 2.03E-261 |
| PPP1R3B      | -4.82703 | 2.95E-204 |
| CLDN23       | -2.51392 | 4.60E-12  |
| PRAG1        | -3.00208 | 9.46E-25  |
| LONRF1       | -2.81466 | 8.26E-184 |
| MTUS1        | -1.00129 | 7.82E-29  |
| NXT1         | -1.97894 | 1.55E-23  |
| GZF1         | -1.08131 | 5.17E-23  |
| PIWIL2       | -1.48653 | 5.89E-05  |
| C8H8orf58    | -3.54087 | 1.43E-75  |
| TNFRSF10B    | -1.34689 | 2.89E-103 |
| LOC103215470 | -1.26921 | 1.88E-20  |
| TNFRSF10D    | -1.21846 | 5.67E-11  |
| TNFRSF10A    | -1.0963  | 1.40E-21  |
| NKX3-1       | -1.26782 | 3.21E-12  |
| GNRH1        | -2.43276 | 2.96E-08  |
| TRIM35       | -1.73586 | 6.30E-48  |
| KIF13B       | -1.03132 | 1.81E-83  |
| PURG         | -2.88831 | 3.47E-08  |
| FUT10        | -1.19595 | 5.73E-23  |
| TTI2         | -1.56737 | 4.05E-50  |
| RNF122       | -2.73631 | 5.44E-25  |
| UNC5D        | -1.18438 | 4.68E-162 |
| ZNF703       | -4.62083 | 1.28E-06  |
| BRF2         | -2.46991 | 1.05E-49  |
| RAB11FIP1    | -1.5582  | 3.04E-30  |
| BAG4         | -1.90251 | 2.36E-61  |
| PLEKHA2      | -1.2516  | 3.14E-47  |
| ZNF343       | -1.18567 | 1.13E-29  |
| GINS4        | 1.052938 | 2.29E-22  |
| KAT6A        | -2.7477  | 3.03E-221 |
| SLC20A2      | -1.57487 | 1.41E-72  |

|              |          |           |
|--------------|----------|-----------|
| THAP1        | -1.02076 | 2.13E-13  |
| STK35        | -2.13861 | 0         |
| DLC1         | -2.72071 | 1.13E-121 |
| LOC103215734 | -1.34134 | 3.95E-12  |
| LOC103215745 | -1.27597 | 4.08E-14  |
| ZNF248       | -1.53051 | 1.06E-49  |
| LOC103215770 | -1.16832 | 3.91E-12  |
| TMEM72       | -2.66814 | 2.03E-10  |
| DEPP1        | -6.33637 | 0         |
| ZNF22        | -1.83045 | 3.71E-36  |
| NCOA4        | -1.57853 | 0         |
| LOC103215829 | -1.9705  | 2.48E-63  |
| FRMPD2       | -1.4051  | 4.04E-05  |
| BMPR1A       | -1.4325  | 2.53E-64  |
| WAPL         | -1.89282 | 1.71E-240 |
| GRID1        | -3.4051  | 4.92E-05  |
| CCSER2       | -1.10385 | 7.68E-50  |
| LOC103215907 | -2.15135 | 3.61E-05  |
| PPIF         | 1.522374 | 1.25E-210 |
| ZMIZ1        | -1.2058  | 1.24E-53  |
| FAM110A      | -2.32865 | 1.10E-13  |
| ZNF503       | -4.98424 | 1.60E-115 |
| SAMD8        | -1.78675 | 4.91E-120 |
| KAT6B        | -1.88731 | 9.25E-33  |
| FUT11        | -1.37572 | 3.36E-31  |
| TBC1D20      | -1.86826 | 5.30E-81  |
| DDIT4        | -4.56195 | 0         |
| CHST3        | -1.72775 | 1.90E-08  |
| EIF6         | 1.138222 | 2.83E-295 |
| ADAMTS14     | 1.658716 | 1.04E-07  |
| TET1         | -3.3578  | 7.31E-05  |
| HNRNPH3      | -1.53837 | 2.67E-283 |
| SIRT1        | -3.3283  | 1.03E-101 |
| JMJD1C       | -2.24769 | 2.63E-199 |
| NRBF2        | -2.41174 | 7.80E-107 |
| ADO          | -1.26431 | 6.26E-53  |
| ARID5B       | -4.38091 | 0         |
| CCDC6        | -1.27073 | 4.75E-94  |
| IPMK         | -1.87203 | 2.53E-77  |
| SPAG4        | 1.108519 | 9.19E-05  |
| MTRNR2L5     | 4.044281 | 5.45E-240 |
| DKK1         | -3.62083 | 6.78E-06  |
| LOC103216188 | -3.99255 | 2.06E-04  |
| CSTF2T       | -2.89913 | 1.62E-111 |



|              |          |           |
|--------------|----------|-----------|
| A1CF         | -3.03587 | 7.64E-04  |
| KLLN         | -2.74859 | 3.22E-07  |
| PTEN         | -1.34688 | 6.10E-98  |
| FAS          | -1.59084 | 1.20E-37  |
| IFIT2        | -4.55943 | 1.51E-42  |
| IFIT3        | -2.11387 | 8.57E-10  |
| IFIT1        | -2.66036 | 8.26E-05  |
| IFIT5        | -2.0027  | 2.84E-10  |
| SLC16A12     | -1.97447 | 2.55E-04  |
| KIF20B       | -1.60555 | 1.57E-214 |
| HTR7         | 1.701095 | 8.79E-08  |
| ANKRD1       | -4.05082 | 6.35E-15  |
| PPP1R3C      | -5.21151 | 7.92E-238 |
| TNKS2        | -1.23842 | 1.99E-94  |
| CPEB3        | -1.01162 | 3.99E-04  |
| KIF11        | -1.12442 | 3.11E-105 |
| HHEX         | -4.99007 | 5.58E-30  |
| LOC103216270 | 3.08966  | 5.87E-12  |
| TBC1D12      | -1.10533 | 3.14E-19  |
| LOC103216306 | -1.2232  | 1.98E-04  |
| CCNJ         | -1.70964 | 4.22E-39  |
| ZNF518A      | -2.99098 | 1.49E-176 |
| LCOR         | -1.27916 | 9.80E-50  |
| FRAT1        | -3.47328 | 1.86E-09  |
| FRAT2        | -3.1624  | 1.45E-16  |
| RRP12        | 1.351758 | 2.33E-158 |
| CNNM1        | 3.613222 | 7.97E-19  |
| ABCC2        | -1.2804  | 1.36E-61  |
| DNMBP        | -2.01162 | 2.66E-84  |
| SCD          | -1.43623 | 0         |
| SLF2         | -1.27776 | 1.84E-99  |
| BTRC         | -1.58116 | 2.17E-95  |
| OGA          | -1.55329 | 0         |
| HPS6         | -2.92298 | 8.39E-76  |
| PPRC1        | -2.70263 | 1.57E-115 |
| WBP1L        | -2.35888 | 6.99E-116 |
| CNNM2        | -1.94395 | 1.24E-62  |
| TAF5         | -1.76681 | 2.15E-15  |
| TGIF2        | -1.96302 | 1.68E-35  |
| SFR1         | -1.36026 | 4.43E-13  |
| ITPRIP       | -2.71561 | 1.16E-18  |
| SORCS3       | 1.277287 | 5.01E-10  |
| DUSP5        | -2.13129 | 3.51E-39  |
| RBM20        | -1.47081 | 7.56E-08  |

|              |          |           |
|--------------|----------|-----------|
| PDCD4        | -1.42159 | 4.29E-60  |
| SHOC2        | -1.30889 | 1.40E-47  |
| GPAM         | -1.00793 | 1.80E-75  |
| NRAP         | -4.0055  | 8.58E-08  |
| HABP2        | -1.82933 | 3.54E-190 |
| SOGA1        | -2.51578 | 3.05E-83  |
| CASP7        | -2.0089  | 7.53E-61  |
| ADRB1        | -4.66036 | 2.01E-12  |
| CCDC186      | -1.19598 | 5.54E-17  |
| FAM160B1     | -2.85301 | 3.66E-95  |
| EMX2         | -3.24505 | 5.37E-157 |
| NANOS1       | -1.16451 | 2.49E-41  |
| EIF3A        | -1.94963 | 0         |
| BAG3         | -1.84894 | 1.17E-112 |
| SLC5A3       | -1.16057 | 3.87E-06  |
| IKZF5        | -2.03587 | 3.59E-50  |
| CHST15       | -1.08267 | 3.88E-17  |
| ZRANB1       | -1.92807 | 6.81E-94  |
| SON          | -1.80975 | 0         |
| DOCK1        | -1.57249 | 2.66E-242 |
| PPP2R2D      | -1.62219 | 5.92E-57  |
| LOC103216760 | 1.342641 | 8.75E-12  |
| TCF7L2       | -2.15662 | 1.95E-43  |
| DNAJC28      | -3.51268 | 1.38E-22  |
| ABRAXAS2     | -2.01384 | 3.01E-56  |
| IMP4         | 1.016914 | 1.56E-80  |
| SAP130       | -1.47328 | 5.22E-87  |
| AMMECR1L     | -1.33995 | 2.05E-61  |
| WDR33        | -1.3358  | 3.50E-130 |
| SFT2D3       | -2.40933 | 2.27E-31  |
| MAP3K2       | -2.10451 | 4.96E-173 |
| NIFK         | -1.33955 | 2.48E-52  |
| GLI2         | -1.53027 | 1.58E-52  |
| PTPN4        | -1.04032 | 5.49E-27  |
| TMEM177      | -3.90094 | 1.78E-127 |
| SCTR         | -1.94276 | 3.51E-04  |
| TMEM37       | -1.88473 | 6.52E-23  |
| INSIG2       | -1.42449 | 2.06E-43  |
| LOC103216964 | -3.15135 | 2.54E-10  |
| LYPD1        | 1.030511 | 2.63E-100 |
| SYNJ1        | -1.47566 | 1.58E-49  |
| CCNT2        | -1.70217 | 1.82E-98  |
| ZEB2         | -2.1455  | 1.12E-57  |
| ACVR2A       | -1.83535 | 8.38E-47  |

|              |          |           |
|--------------|----------|-----------|
| MBD5         | -1.36231 | 1.35E-46  |
| EPC2         | -2.78114 | 5.06E-109 |
| RND3         | -3.99587 | 7.56E-210 |
| RIF1         | -1.16873 | 2.29E-66  |
| NR4A2        | -3.77284 | 7.79E-04  |
| TANC1        | -1.37337 | 1.22E-54  |
| SCAF4        | -2.14003 | 4.99E-127 |
| BAZ2B        | -1.43625 | 1.91E-48  |
| 7-Mar        | -1.992   | 1.46E-228 |
| ITGB6        | -1.14817 | 3.01E-08  |
| TANK         | -1.24243 | 3.14E-36  |
| FIGN         | -1.99364 | 1.96E-43  |
| SCN2A        | -1.43506 | 6.19E-37  |
| LOC103217237 | -4.25362 | 3.21E-05  |
| NOSTRIN      | 6.249531 | 3.66E-07  |
| TLK1         | -1.36576 | 2.39E-71  |
| SLC25A12     | -1.48044 | 5.04E-103 |
| SP3          | -1.50597 | 2.23E-154 |
| GPR155       | 1.080444 | 1.04E-32  |
| ATF2         | -1.24968 | 3.38E-84  |
| HOXD13       | -1.34834 | 2.16E-16  |
| HOXD9        | -1.50803 | 9.10E-27  |
| HOXD3        | -2.60845 | 1.31E-23  |
| HOXD4        | -2.34609 | 3.88E-43  |
| NFE2L2       | -2.09274 | 0         |
| LOC103217397 | -3.74914 | 6.82E-33  |
| LOC103217405 | -3.25775 | 1.77E-31  |
| PLEKHA3      | -1.50234 | 2.67E-13  |
| SESTD1       | -1.00604 | 4.65E-43  |
| CWC22        | -1.5809  | 1.43E-78  |
| ITPRID2      | -1.07077 | 6.24E-73  |
| BACH1        | -4.4468  | 6.75E-209 |
| PDE1A        | -1.11833 | 2.31E-04  |
| CALCRL       | 2.442176 | 1.45E-04  |
| COL3A1       | 1.897015 | 8.19E-04  |
| SLC39A10     | -1.0725  | 0         |
| STK17B       | -1.42173 | 3.69E-227 |
| ANKRD44      | -1.88295 | 1.82E-21  |
| LTN1         | -1.05554 | 5.29E-73  |
| MARS2        | -1.62083 | 5.21E-30  |
| SATB2        | -1.01938 | 7.09E-08  |
| C10H2orf69   | -3.82884 | 4.85E-69  |
| SGO2         | -1.13584 | 7.24E-45  |
| CLK1         | -2.56483 | 8.55E-147 |

|              |          |           |
|--------------|----------|-----------|
| MPP4         | 5.134054 | 1.16E-06  |
| FZD7         | -2.46471 | 3.68E-58  |
| NOP58        | 1.023436 | 2.35E-183 |
| BMPR2        | -1.31738 | 8.84E-165 |
| FAM117B      | -1.5136  | 2.52E-18  |
| RAPH1        | -1.48743 | 4.88E-16  |
| ADAMTS1      | -2.56643 | 0         |
| INO80D       | -2.3609  | 2.63E-41  |
| GPR1         | 2.847621 | 1.49E-09  |
| ZDBF2        | -1.3049  | 1.21E-28  |
| KLF7         | -1.61471 | 2.66E-111 |
| CREB1        | -1.37814 | 2.63E-82  |
| FZD5         | -1.82014 | 2.79E-22  |
| PLEKHM3      | -1.04561 | 4.96E-21  |
| PIKFYVE      | -1.87148 | 2.89E-90  |
| KANSL1L      | -1.10073 | 1.10E-21  |
| IKZF2        | -2.28661 | 1.57E-22  |
| BARD1        | -1.0031  | 8.21E-22  |
| ABCA12       | -3.4953  | 2.24E-05  |
| RUFY4        | 1.549091 | 4.76E-05  |
| CTDSP1       | -1.06227 | 6.20E-63  |
| RNF25        | -1.7293  | 7.10E-22  |
| CDK5R2       | -2.84323 | 1.51E-14  |
| CARNS1       | -2.59387 | 2.86E-06  |
| KCNE4        | -4.24316 | 2.45E-97  |
| MRPL44       | -1.89442 | 2.72E-83  |
| CUL3         | -1.84559 | 2.95E-269 |
| IRS1         | -2.43797 | 4.42E-21  |
| HTR2B        | -4.17429 | 1.11E-46  |
| B3GNT7       | -3.74246 | 2.38E-158 |
| TIGD1        | -2.2861  | 3.05E-14  |
| EIF4E2       | -1.77916 | 7.15E-165 |
| GIGYF2       | -2.22499 | 1.68E-155 |
| HJURP        | -1.94841 | 5.90E-92  |
| LOC103218119 | -4.56985 | 1.12E-63  |
| C2H21orf91   | -1.40868 | 1.75E-05  |
| ARL4C        | -2.84563 | 0         |
| SH3BP4       | -1.47983 | 3.56E-68  |
| GBX2         | -1.77284 | 6.02E-06  |
| CXADR        | -1.00943 | 2.04E-70  |
| KLHL30       | -1.74369 | 9.01E-10  |
| ERFE         | 1.712423 | 7.73E-30  |
| HES6         | 1.016596 | 2.42E-05  |
| PER2         | -1.28231 | 1.20E-05  |

|              |          |           |
|--------------|----------|-----------|
| NRIP1        | -2.65198 | 0         |
| LOC103218231 | -2.84803 | 1.22E-05  |
| MTERF4       | -2.42862 | 2.18E-75  |
| LOC103218293 | -2.06562 | 9.70E-05  |
| HSPA13       | -1.57133 | 2.05E-147 |
| KDM5A        | -1.22401 | 1.01E-49  |
| FBXL14       | -2.06434 | 2.97E-42  |
| DCP1B        | -2.09253 | 1.82E-120 |
| FKBP4        | 1.232497 | 0         |
| TULP3        | -1.04131 | 2.23E-71  |
| DYRK4        | 5.356446 | 2.28E-04  |
| AKAP3        | -1.0992  | 1.20E-10  |
| PLEKHG6      | -1.5516  | 3.39E-71  |
| TNFRSF1A     | -1.5471  | 0         |
| LPAR5        | -2.99007 | 3.41E-32  |
| LRRC23       | -1.06123 | 4.75E-09  |
| RUNX1        | -1.93067 | 6.29E-130 |
| C1RL         | -1.3672  | 1.39E-32  |
| FOXJ2        | -1.27943 | 1.24E-46  |
| C3AR1        | -1.47911 | 2.54E-08  |
| CLCF1        | -1.20973 | 6.79E-23  |
| CBR3         | -1.15135 | 4.81E-06  |
| MORC3        | -2.175   | 1.45E-125 |
| ETV6         | -1.13209 | 1.66E-12  |
| LRP6         | -2.59631 | 4.99E-152 |
| MANSC1       | -1.79561 | 2.64E-28  |
| BORCS5       | -1.01384 | 8.63E-08  |
| DUSP16       | -2.00776 | 3.19E-158 |
| CDKN1B       | -5.01351 | 0         |
| GPRC5A       | -3.24965 | 3.48E-61  |
| ATF7IP       | -2.16737 | 2.35E-64  |
| PLEKHA5      | -1.78773 | 2.82E-194 |
| DYRK1A       | -2.64112 | 6.98E-183 |
| AEBP2        | -1.88504 | 5.69E-129 |
| PDE3A        | -2.22852 | 6.31E-09  |
| KCNJ8        | -2.68607 | 0         |
| KRAS         | -1.72437 | 3.85E-63  |
| RASSF8       | -2.17412 | 0         |
| PTHLH        | -3.9587  | 6.76E-14  |
| DENND5B      | -1.01758 | 3.45E-27  |
| RESF1        | -3.13647 | 5.31E-46  |
| ETS2         | -2.00454 | 1.52E-106 |
| SYT10        | -1.65304 | 1.10E-220 |
| LOC103218846 | -1.01162 | 1.17E-08  |

|              |          |           |
|--------------|----------|-----------|
| LOC103218871 | -1.82942 | 2.19E-04  |
| SINHCAF      | -1.28204 | 5.93E-30  |
| FGD4         | -1.23052 | 1.00E-04  |
| LOC103218894 | -1.8569  | 1.61E-04  |
| MORN5        | -3.09476 | 5.18E-04  |
| TTLL11       | -1.22098 | 9.82E-08  |
| BRWD1        | -1.62708 | 9.86E-99  |
| CNTRL        | -1.75335 | 1.39E-48  |
| PSMD5        | -1.34276 | 6.69E-41  |
| MEGF9        | -3.6805  | 3.53E-125 |
| BRINP1       | -1.3188  | 2.63E-15  |
| TRIM32       | -3.29221 | 2.90E-157 |
| AKNA         | -1.30607 | 2.40E-30  |
| ZNF618       | -1.18282 | 6.90E-63  |
| RGS3         | -1.15014 | 1.16E-56  |
| HDHD3        | -3.33499 | 1.18E-62  |
| ZFP37        | -4.58019 | 2.95E-22  |
| UGCG         | -2.20799 | 0         |
| LPAR1        | -1.41402 | 1.11E-136 |
| PTPN3        | -2.7171  | 0         |
| ZNF462       | -1.15545 | 2.88E-45  |
| ABCA1        | -1.54813 | 4.57E-23  |
| ZNF189       | -3.66814 | 2.63E-50  |
| MSANTD3      | -1.79857 | 6.20E-63  |
| ALG2         | -1.94514 | 4.88E-134 |
| TGFBR1       | -1.37079 | 4.16E-222 |
| TBC1D2       | -1.04877 | 2.67E-49  |
| SHB          | -1.42009 | 1.24E-208 |
| ZBTB5        | -2.2316  | 2.69E-44  |
| RNF38        | -1.10511 | 3.60E-52  |
| GNE          | -1.80463 | 2.59E-121 |
| HRCT1        | -2.80846 | 2.01E-35  |
| RIPK4        | -2.53064 | 1.39E-18  |
| TPM2         | 1.352949 | 1.87E-37  |
| RUSC2        | -1.02857 | 2.48E-57  |
| KDM2A        | -1.27763 | 1.72E-160 |
| FAM214B      | -1.48194 | 6.59E-79  |
| C12H9orf131  | -1.2394  | 8.49E-04  |
| DNAJB5       | -1.88991 | 1.97E-69  |
| CCL27        | 1.223691 | 1.49E-09  |
| MYORG        | -1.10976 | 8.27E-22  |
| UBAP2        | -1.00871 | 1.66E-122 |
| NOL6         | 1.549091 | 4.32E-227 |
| NFX1         | -1.26398 | 3.91E-74  |

|              |          |           |
|--------------|----------|-----------|
| ZBTB21       | -2.05906 | 5.89E-65  |
| TOPORS       | -3.29665 | 7.43E-172 |
| ACER2        | -1.66296 | 2.32E-16  |
| DENND4C      | -1.35071 | 1.87E-94  |
| RRAGA        | -1.89408 | 1.10E-207 |
| SAXO1        | -2.17175 | 6.49E-29  |
| BNC2         | -1.21569 | 2.67E-27  |
| WDR4         | 1.30068  | 7.07E-36  |
| RANBP6       | -3.53064 | 7.98E-192 |
| KIAA2026     | -2.18921 | 5.57E-86  |
| RIC1         | -1.28021 | 4.30E-62  |
| LOC103219486 | -1.15135 | 7.30E-07  |
| CDC37L1      | -2.05294 | 2.84E-44  |
| PLPP6        | -3.26004 | 9.61E-99  |
| VLDLR        | -3.45337 | 2.14E-138 |
| DMRT1        | 1.616206 | 1.61E-04  |
| KANK1        | -1.03716 | 1.40E-30  |
| LOC103219534 | -1.34021 | 1.20E-07  |
| PIP5K1B      | 1.243842 | 9.55E-05  |
| FAM122A      | -3.37541 | 1.56E-72  |
| SIK1         | -4.1284  | 2.00E-285 |
| SMC5         | -1.21226 | 1.26E-61  |
| TRPM3        | -1.47328 | 1.11E-42  |
| KLF9         | -4.55644 | 2.63E-73  |
| CEMIP2       | -1.17929 | 1.36E-89  |
| ABHD17B      | -3.19317 | 7.55E-55  |
| ZFAND5       | -3.06011 | 0         |
| RORB         | -1.71394 | 7.26E-04  |
| GCNT1        | -1.93369 | 2.04E-30  |
| PRUNE2       | -1.23646 | 3.45E-97  |
| PSAT1        | 1.149359 | 0         |
| TLE4         | -1.04564 | 2.60E-04  |
| TLE1         | -1.38873 | 5.10E-187 |
| KIF27        | -1.15135 | 3.08E-18  |
| RMI1         | -1.91558 | 1.05E-37  |
| TRAPPC10     | -1.17891 | 5.23E-72  |
| TUT7         | -1.43619 | 1.40E-69  |
| GAS1         | -8.41958 | 2.63E-135 |
| C1H11orf86   | -1.74859 | 1.32E-04  |
| LOC103219727 | -1.59557 | 3.61E-59  |
| NFIL3        | -4.38919 | 1.34E-226 |
| IPPK         | -1.03587 | 6.98E-13  |
| LOC103219782 | -1.36856 | 3.70E-37  |
| ZNF484       | -3.39577 | 2.12E-20  |

|              |          |           |
|--------------|----------|-----------|
| ZNF658       | -2.43411 | 2.72E-39  |
| CDC14B       | -1.15427 | 1.53E-70  |
| ZNF367       | -2.5494  | 3.01E-38  |
| PTCH1        | -3.25826 | 7.57E-35  |
| AOPEP        | -1.5327  | 2.09E-56  |
| ZNF782       | -1.06141 | 7.49E-06  |
| KDM3A        | -1.86574 | 2.86E-147 |
| DQX1         | -1.07674 | 3.43E-06  |
| DOK1         | -1.31181 | 1.49E-29  |
| PCGF1        | -1.12076 | 9.26E-14  |
| C14H2orf81   | -1.66036 | 3.45E-05  |
| TET3         | -1.73355 | 8.26E-39  |
| LOC103220050 | -3.84323 | 5.20E-04  |
| EXOC6B       | -1.00053 | 4.97E-72  |
| CYP26B1      | 2.759127 | 1.26E-47  |
| ZNF638       | -1.23833 | 5.53E-99  |
| LOC103220073 | -1.12898 | 6.11E-09  |
| MPHOSPH10    | -2.41408 | 1.66E-86  |
| C14H2orf42   | -1.37094 | 5.00E-17  |
| PCBP1        | -1.33851 | 0         |
| MXD1         | -3.17527 | 1.71E-72  |
| GMCL1        | -1.02976 | 8.57E-32  |
| AAK1         | -1.03756 | 1.14E-23  |
| FBXO48       | -1.95341 | 3.92E-08  |
| ETAA1        | -2.57711 | 2.41E-112 |
| LOC103220141 | -3.09476 | 5.18E-04  |
| MEIS1        | -1.52986 | 2.28E-09  |
| SPRED2       | -2.21953 | 9.19E-196 |
| CEP68        | -1.36207 | 1.20E-28  |
| SERTAD2      | -4.06005 | 0         |
| LOC103220160 | -3.30889 | 1.08E-04  |
| AFTPH        | -2.16319 | 1.30E-114 |
| PELI1        | -1.87116 | 5.56E-211 |
| LOC103220168 | -2.19578 | 2.97E-09  |
| OTX1         | -5.12333 | 5.80E-33  |
| TMEM17       | 1.167457 | 1.82E-14  |
| B3GNT2       | -2.48908 | 2.84E-115 |
| REL          | -3.53837 | 1.00E-18  |
| PAPOLG       | -2.47678 | 1.76E-57  |
| BCL11A       | -2.53837 | 3.58E-09  |
| LOC103220237 | -1.81693 | 1.20E-19  |
| ERLEC1       | -1.20515 | 3.33E-132 |
| STON1        | -2.00416 | 5.29E-58  |
| FOXN2        | -1.84176 | 3.89E-32  |



|            |          |           |
|------------|----------|-----------|
| MSH6       | -1.90731 | 1.66E-157 |
| FBXO11     | -1.39436 | 1.49E-117 |
| SOCS5      | -2.55677 | 2.21E-90  |
| PRKCE      | 1.372665 | 5.44E-16  |
| SIX2       | -2.73631 | 3.94E-05  |
| SIX3       | -1.99523 | 4.50E-06  |
| PPM1B      | -1.19789 | 3.32E-111 |
| C1GALT1C1L | -3.02456 | 5.97E-44  |
| ZFP36L2    | -4.39037 | 1.98E-73  |
| PKDCC      | -1.14845 | 2.30E-24  |
| C14H2orf91 | -1.54607 | 8.73E-06  |
| THUMPD2    | -1.05611 | 5.99E-11  |
| MAP4K3     | -1.85783 | 7.83E-80  |
| GEMIN6     | -2.02878 | 1.03E-15  |
| ATL2       | -1.14398 | 2.45E-58  |
| CYP1B1     | -2.0143  | 4.11E-62  |
| CDC42EP3   | -1.59832 | 1.26E-206 |
| PRKD3      | -1.49875 | 1.43E-118 |
| CEBPZ      | -1.47782 | 2.79E-90  |
| HEATR5B    | -1.43777 | 2.23E-68  |
| BIRC6      | -1.45257 | 1.24E-194 |
| YPEL5      | -1.65053 | 1.68E-93  |
| WDR43      | -1.93348 | 0         |
| FOSL2      | -3.33493 | 0         |
| CCDC121    | -1.12898 | 4.84E-04  |
| SLC5A6     | 1.389692 | 1.54E-79  |
| PREB       | 1.017716 | 6.00E-85  |
| DPYSL5     | 1.333805 | 7.91E-116 |
| OTOF       | -1.23089 | 2.92E-10  |
| DRC1       | -1.17753 | 1.15E-05  |
| SELENOI    | -1.24853 | 5.00E-43  |
| DNAJC27    | -2.38872 | 1.18E-54  |
| WDCP       | -2.16269 | 9.92E-41  |
| ATAD2B     | -1.74831 | 3.08E-52  |
| GDF7       | -1.82014 | 2.79E-22  |
| RHOB       | -5.01705 | 0         |
| PUM2       | -2.6905  | 0         |
| OSR1       | -4.62083 | 1.28E-06  |
| RDH14      | -2.12333 | 6.53E-36  |
| LRATD1     | -2.86173 | 3.75E-100 |
| TRIB2      | -4.2257  | 5.68E-96  |
| LPIN1      | -1.16178 | 0         |
| E2F6       | -1.97541 | 2.92E-54  |
| GREB1      | 1.205842 | 3.66E-15  |

|              |          |           |
|--------------|----------|-----------|
| ODC1         | 1.030127 | 0         |
| LOC103220823 | -2.23227 | 1.32E-05  |
| KLF11        | -2.69995 | 2.19E-130 |
| LOC103220837 | 2.25536  | 1.32E-08  |
| ID2          | -4.76791 | 1.22E-134 |
| SOX11        | -2.00111 | 6.08E-07  |
| RBM39        | -1.66451 | 3.33E-176 |
| ALKAL2       | -2.81877 | 5.93E-38  |
| SH3YL1       | -1.13896 | 7.00E-12  |
| LOC103221001 | -3.88387 | 4.13E-13  |
| ASXL2        | -1.08347 | 6.11E-56  |
| CSRNP1       | -3.57519 | 4.48E-150 |
| ACVR2B       | -1.92304 | 3.12E-107 |
| SLC22A14     | 1.812126 | 2.19E-04  |
| GOLGA4       | -1.04773 | 5.29E-99  |
| EPM2AIP1     | -2.18819 | 2.70E-119 |
| TRANK1       | -1.47328 | 4.12E-04  |
| TBCCD1       | -2.15604 | 6.63E-119 |
| MAGEF1       | -1.31118 | 2.88E-37  |
| LINC00205    | -1.23256 | 1.82E-22  |
| B3GNT5       | -3.19115 | 1.84E-70  |
| KLHL24       | -4.08235 | 2.39E-50  |
| SOX2         | 4.008523 | 1.08E-05  |
| RBM4         | -1.41949 | 6.61E-122 |
| ZMAT3        | -2.49998 | 2.51E-86  |
| TBL1XR1      | -1.40971 | 1.71E-111 |
| LOC103221232 | 1.674747 | 5.40E-08  |
| NLGN1        | -1.08562 | 1.27E-44  |
| FNDC3B       | -1.63993 | 0         |
| PLD1         | -1.33952 | 5.36E-43  |
| SLC2A2       | -1.59387 | 1.28E-06  |
| SLC7A14      | 6.639945 | 6.36E-09  |
| SKIL         | -3.42016 | 0         |
| PHC3         | -1.09592 | 3.51E-86  |
| PELO         | -4.3591  | 0         |
| LRRC31       | -1.05052 | 3.43E-09  |
| MYNN         | -1.6324  | 2.26E-34  |
| MECOM        | -1.38709 | 1.65E-09  |
| ZNF639       | -3.24792 | 9.99E-68  |
| FST          | -1.71394 | 1.21E-06  |
| GCLC         | -1.9796  | 8.81E-225 |
| GCM1         | -1.91034 | 4.81E-04  |
| PAQR8        | -2.05011 | 5.34E-38  |
| PKHD1        | -1.11387 | 6.13E-08  |

|              |          |           |
|--------------|----------|-----------|
| SNX18        | -2.00703 | 2.67E-67  |
| ADGRF2       | -1.28203 | 1.59E-12  |
| ADGRF4       | -1.31705 | 2.16E-23  |
| ADGRF5       | -1.87237 | 5.37E-06  |
| RUNX2        | -1.32596 | 1.95E-33  |
| LOC103221425 | -2.49044 | 8.60E-15  |
| RBM4B        | -2.86985 | 1.91E-64  |
| MAD2L1BP     | -2.73759 | 1.23E-58  |
| POLH         | -1.3578  | 4.83E-70  |
| ZNF318       | -1.29928 | 6.36E-59  |
| BICRAL       | -2.89298 | 7.75E-90  |
| TBCC         | -3.17402 | 7.37E-54  |
| TFEB         | -1.27688 | 8.40E-10  |
| NFYA         | -1.22716 | 4.36E-69  |
| SAYSD1       | -1.46373 | 2.71E-06  |
| TMEM217      | -2.43221 | 3.00E-08  |
| TBC1D22B     | -2.02737 | 6.15E-98  |
| PIM1         | -3.60172 | 8.56E-177 |
| CDKN1A       | -1.55272 | 0         |
| BRPF3        | -1.61831 | 7.91E-91  |
| IP6K3        | -2.42099 | 3.97E-94  |
| ZBTB9        | -3.61582 | 4.11E-76  |
| KIFC1        | -1.32205 | 3.29E-68  |
| ZBTB22       | -1.40843 | 2.81E-38  |
| B3GALT4      | -1.09137 | 2.62E-10  |
| MHC-DOA      | 5.106134 | 1.50E-06  |
| MAP3K1       | -4.27382 | 0         |
| PBX2         | -1.01992 | 3.45E-86  |
| FKBPL        | -3.53365 | 2.29E-40  |
| C4B          | -1.4705  | 4.46E-06  |
| MIER3        | -3.2682  | 2.75E-106 |
| ZBTB12       | -1.46062 | 1.19E-14  |
| HSPA1B       | -4.33363 | 0         |
| HSPA1L       | -1.87717 | 6.57E-04  |
| HSPA1A       | -3.55976 | 2.97E-151 |
| LY6G5B       | 1.019982 | 4.12E-07  |
| LOC103221768 | -1.17619 | 8.24E-08  |
| MUCL3        | -2.4051  | 7.22E-04  |
| IER3         | -3.60014 | 0         |
| PLK2         | -3.78119 | 0         |
| PPP1R10      | -4.47881 | 0         |
| PRR3         | -1.0025  | 1.16E-16  |
| LOC103221842 | -1.28231 | 1.20E-05  |
| TRIM26       | -2.15662 | 1.95E-43  |

|              |          |           |
|--------------|----------|-----------|
| MOG          | 3.997992 | 1.18E-14  |
| PDE4D        | -2.87759 | 0         |
| ZBED9        | -1.72775 | 1.90E-08  |
| ZKSCAN3      | -1.20338 | 1.68E-04  |
| PGBD1        | -1.13103 | 1.92E-05  |
| ZSCAN26      | -1.52835 | 4.69E-15  |
| ZKSCAN4      | -1.39844 | 9.79E-06  |
| ZNF165       | -4.62083 | 1.28E-06  |
| ZSCAN16      | -5.25826 | 5.51E-10  |
| ZKSCAN8      | -1.78589 | 3.73E-81  |
| CCS          | 1.165176 | 7.86E-09  |
| HIST1H1B     | 5.134054 | 7.11E-04  |
| LOC103221946 | -1.61237 | 4.52E-10  |
| LOC103221947 | -2.8644  | 1.85E-14  |
| ZNF391       | -2.65254 | 2.92E-10  |
| ZNF184       | -2.4599  | 8.93E-16  |
| ZNF322       | -2.83585 | 9.22E-63  |
| ABT1         | -2.10371 | 1.78E-43  |
| LOC103222011 | -1.97626 | 2.17E-84  |
| LOC103222014 | -2.27655 | 6.25E-34  |
| LOC103222020 | -1.25826 | 4.87E-17  |
| SLC17A2      | -2.03587 | 1.34E-04  |
| C17H6orf62   | -1.22827 | 2.66E-114 |
| TDP2         | -1.02245 | 1.01E-17  |
| DCDC2        | -1.07315 | 3.94E-87  |
| ZSWIM6       | -2.32538 | 1.72E-75  |
| E2F3         | -4.0106  | 1.88E-80  |
| KIF13A       | -2.17378 | 1.14E-56  |
| NUP153       | -2.46035 | 1.30E-291 |
| MYLIP        | -3.09476 | 7.95E-10  |
| KIF2A        | -1.15304 | 2.94E-94  |
| JARID2       | -2.00964 | 6.21E-32  |
| EDN1         | -4.09476 | 4.97E-235 |
| HIVEP1       | -3.49239 | 1.07E-126 |
| NEDD9        | -4.15135 | 3.01E-53  |
| TFAP2A       | -2.75146 | 8.99E-138 |
| SNRNP48      | -2.02281 | 1.77E-32  |
| RREB1        | -2.26179 | 1.76E-302 |
| PPP1R3G      | -1.58669 | 3.19E-18  |
| PRPF4B       | -1.918   | 0         |
| FAM50B       | -1.41343 | 2.91E-14  |
| PXDC1        | -2.0028  | 8.27E-95  |
| SLC22A23     | -1.32051 | 6.62E-47  |
| FOXC1        | -2.45451 | 2.52E-37  |

|              |          |           |
|--------------|----------|-----------|
| FOXF2        | -3.15303 | 3.02E-101 |
| FOXQ1        | -5.60066 | 1.29E-23  |
| IRF4         | -3.53837 | 1.50E-05  |
| PPWD1        | -1.47498 | 7.76E-40  |
| TAF8         | -1.47081 | 1.78E-04  |
| LOC103222346 | -1.47197 | 1.73E-07  |
| LOC103222352 | 11.1235  | 6.45E-134 |
| TRIM23       | -1.56795 | 5.27E-32  |
| ZSCAN12      | -3.10579 | 4.55E-19  |
| LOC103222374 | -2.32069 | 6.03E-53  |
| LOC103222379 | -4.03587 | 5.76E-08  |
| MEX3C        | -1.28054 | 2.13E-68  |
| ERBIN        | -1.59415 | 1.42E-132 |
| SMAD4        | -1.32861 | 7.09E-69  |
| LIPG         | -2.5213  | 1.23E-24  |
| SMAD7        | -5.08511 | 4.96E-186 |
| RNF165       | 1.881667 | 1.25E-07  |
| EPG5         | -1.44865 | 1.20E-114 |
| SETBP1       | -1.18362 | 7.68E-05  |
| PIK3C3       | -1.23041 | 2.61E-155 |
| MAST4        | -2.13541 | 1.21E-69  |
| CELF4        | -1.41027 | 3.88E-04  |
| ZNF24        | -1.70041 | 1.24E-129 |
| ZNF397       | -1.8536  | 2.59E-23  |
| ASXL3        | -2.7952  | 6.03E-35  |
| GAREM1       | -1.48567 | 3.05E-32  |
| KLHL14       | -3.4358  | 3.60E-13  |
| RNF138       | -2.62083 | 7.58E-38  |
| TRAPPC8      | -1.32563 | 2.47E-74  |
| PIK3R1       | -4.63714 | 0         |
| KCTD1        | -1.40209 | 1.11E-46  |
| ZNF521       | -1.92123 | 4.70E-10  |
| HRH4         | -1.02694 | 2.45E-05  |
| CABYR        | -1.57987 | 4.79E-115 |
| GATA6        | -3.52416 | 3.50E-14  |
| ESCO1        | -1.40774 | 3.32E-71  |
| EMILIN2      | -2.53837 | 3.58E-09  |
| TGIF1        | -3.36374 | 0         |
| LOC103222706 | -4.04337 | 1.99E-28  |
| DLGAP1       | 1.134054 | 4.83E-14  |
| ZBTB14       | -1.23298 | 6.60E-19  |
| ARHGAP28     | -1.23518 | 1.11E-07  |
| ANKRD12      | -1.5769  | 8.26E-73  |
| CDK7         | -2.09975 | 1.01E-119 |

|              |          |           |
|--------------|----------|-----------|
| CHMP1B       | -1.71148 | 5.43E-173 |
| CCNB1        | -1.02581 | 2.79E-185 |
| CEP76        | -1.54728 | 3.62E-17  |
| FAM210A      | -1.35224 | 2.42E-32  |
| IL17RA       | -1.02535 | 1.56E-57  |
| TMEM121B     | -1.87717 | 6.57E-04  |
| BDP1         | -1.04288 | 1.43E-28  |
| CECR2        | -1.04799 | 4.41E-07  |
| USP18        | 1.146993 | 2.92E-06  |
| LOC103222906 | -1.82595 | 2.46E-06  |
| YDJC         | 1.34416  | 2.49E-89  |
| HIC2         | -1.86941 | 4.97E-19  |
| CRKL         | -1.9063  | 1.84E-141 |
| ZNF74        | -1.11387 | 2.26E-07  |
| RANBP1       | 1.020783 | 0         |
| CDC45        | 1.466319 | 8.40E-138 |
| TMEM171      | -1.40732 | 3.78E-08  |
| TSSK2        | -1.78878 | 1.12E-06  |
| ESS2         | -1.3739  | 1.18E-32  |
| ZNF70        | -2.06562 | 2.29E-08  |
| FOXD1        | -2.38241 | 2.42E-42  |
| PHRF1        | -1.55301 | 1.11E-115 |
| ADORA2A      | 1.022771 | 3.45E-13  |
| LOC103223066 | -1.09701 | 4.03E-15  |
| ARHGEF28     | -1.41868 | 6.15E-224 |
| ASPHD2       | -2.16515 | 2.35E-09  |
| TFIP11       | -1.16383 | 8.40E-51  |
| SRRD         | -1.35539 | 2.59E-25  |
| MN1          | -2.59152 | 5.53E-99  |
| TTC28        | -1.31863 | 5.52E-63  |
| ENC1         | -2.64502 | 2.07E-42  |
| CCDC117      | -1.83142 | 4.02E-62  |
| XBP1         | -2.75542 | 8.45E-304 |
| ZNRF3        | -1.44446 | 1.43E-76  |
| NSA2         | -1.4622  | 0         |
| MTMR3        | -1.19664 | 5.13E-83  |
| LIF          | -1.2076  | 1.14E-175 |
| CASTOR1      | -4.03587 | 2.94E-28  |
| TBC1D10A     | -1.82266 | 1.56E-48  |
| GAL3ST1      | -2.55105 | 1.73E-33  |
| DUSP18       | -1.2838  | 9.05E-12  |
| PIK3IP1      | -1.91034 | 8.69E-05  |
| PATZ1        | -1.75347 | 3.75E-79  |
| SFI1         | 1.336895 | 6.32E-34  |

|              |          |           |
|--------------|----------|-----------|
| GCNT4        | -3.25826 | 1.60E-04  |
| EIF4ENIF1    | -3.31951 | 2.34E-250 |
| PRR14L       | -2.51121 | 1.17E-253 |
| DEPDC5       | -2.02234 | 1.47E-106 |
| HMGXB4       | -2.3503  | 5.50E-116 |
| HMOX1        | -1.42313 | 2.87E-61  |
| MCM5         | 1.304423 | 0         |
| HMGCR        | -3.11589 | 0         |
| NCF4         | 1.154813 | 2.34E-04  |
| C1QTNF6      | -1.98073 | 3.33E-17  |
| SSTR3        | -1.49044 | 1.36E-04  |
| COL4A3BP     | -1.38222 | 5.60E-53  |
| ELFN2        | -1.31397 | 6.20E-72  |
| CDC42EP1     | -1.01911 | 7.35E-87  |
| PDXP         | 1.350947 | 2.52E-43  |
| H1F0         | -1.59365 | 0         |
| PDGFB        | -3.02842 | 0         |
| F2RL2        | -1.27688 | 6.45E-07  |
| ATF4         | -1.13276 | 0         |
| CACNA1I      | -3.60066 | 1.78E-10  |
| MRTFA        | -1.26617 | 3.96E-54  |
| F2RL1        | -2.12761 | 9.27E-193 |
| EP300        | -2.55889 | 0         |
| CHADL        | 2.018577 | 6.74E-05  |
| TEF          | -2.64918 | 2.62E-177 |
| TOB2         | -4.40421 | 1.88E-238 |
| TCF20        | -2.68847 | 1.01E-235 |
| LOC103223421 | 1.549091 | 2.43E-05  |
| EFCAB6       | -1.83697 | 2.12E-08  |
| RTL6         | -2.51568 | 1.20E-228 |
| NUP50        | -1.55488 | 3.82E-118 |
| BRD1         | -2.09888 | 1.29E-105 |
| PIM3         | -1.02245 | 1.01E-17  |
| ZBED4        | -4.04896 | 2.58E-110 |
| MAPK11       | 1.05411  | 4.14E-52  |
| LHFPL2       | -1.2672  | 2.83E-42  |
| TYMP         | 1.330911 | 8.41E-07  |
| JMY          | -1.7235  | 2.89E-65  |
| TNRC6B       | -2.01676 | 6.08E-49  |
| HSPA6        | -4.38165 | 3.38E-19  |
| MPZ          | -1.58841 | 6.25E-08  |
| TENT2        | -1.42413 | 5.86E-149 |
| USP21        | -1.22888 | 8.47E-40  |
| PFDN2        | 1.077559 | 2.05E-52  |

|              |          |           |
|--------------|----------|-----------|
| PIGM         | -2.59139 | 8.14E-20  |
| MTX3         | -1.62635 | 2.27E-56  |
| TMEM151A     | -1.93204 | 3.46E-10  |
| SERINC5      | -1.14064 | 8.10E-22  |
| ETV3         | -3.13134 | 7.78E-126 |
| PRCC         | -2.27168 | 6.48E-152 |
| PAQR6        | 1.381981 | 4.06E-08  |
| TMEM79       | -1.56639 | 6.49E-13  |
| ANKRD34B     | -1.67477 | 3.30E-19  |
| MEF2D        | -1.78232 | 4.56E-56  |
| MEX3A        | -1.58947 | 3.72E-15  |
| KHDC4        | -1.64704 | 2.23E-99  |
| RIT1         | -1.34107 | 3.42E-40  |
| SYT11        | -2.66036 | 8.26E-05  |
| ASH1L        | -1.34387 | 6.23E-136 |
| EFNA1        | -2.8536  | 4.30E-75  |
| EFNA3        | -1.62655 | 1.43E-14  |
| ZBTB7B       | -1.22427 | 2.00E-54  |
| EFNA4        | -2.7194  | 1.28E-22  |
| CHRNA2       | -1.38951 | 5.02E-04  |
| IL6R         | -1.89596 | 2.91E-40  |
| LOC103223928 | -2.13941 | 8.82E-29  |
| UBAP2L       | -1.57385 | 4.53E-283 |
| GATAD2B      | -1.50257 | 3.34E-57  |
| CHTOP        | -1.35143 | 1.76E-64  |
| LOC103223983 | 2.499314 | 8.03E-04  |
| LOC103224002 | 2.87102  | 2.84E-04  |
| RORC         | -2.44269 | 6.50E-17  |
| TUFT1        | -1.08818 | 4.50E-88  |
| POGZ         | -2.25546 | 2.60E-210 |
| ZNF687       | -2.3761  | 1.22E-186 |
| LYSMD1       | -1.78589 | 2.93E-21  |
| TXNIP        | -4.82584 | 0         |
| ANKRD34A     | -3.4953  | 1.26E-09  |
| PEX11B       | -2.31105 | 2.97E-29  |
| NUDT17       | -1.11721 | 6.14E-05  |
| PDZK1        | -2.03514 | 1.21E-142 |
| CD160        | -1.53837 | 1.46E-37  |
| NBPF8        | -1.7916  | 9.61E-40  |
| ZNF697       | -3.72703 | 6.00E-22  |
| TBX15        | -3.33355 | 1.93E-08  |
| VCAN         | -1.9772  | 0         |
| CD58         | -1.12661 | 1.72E-19  |
| VANGL1       | -1.81395 | 5.73E-82  |



|              |          |           |
|--------------|----------|-----------|
| NGF          | -2.61479 | 2.73E-231 |
| DENND2C      | -1.84323 | 8.83E-12  |
| TRIM33       | -1.47758 | 4.21E-76  |
| RSBN1        | -4.2964  | 9.00E-152 |
| KLC2         | 1.037752 | 2.58E-73  |
| LRIG2        | -2.52332 | 2.53E-54  |
| CTTNBP2NL    | -2.22174 | 5.41E-132 |
| DDX20        | -2.83995 | 6.92E-94  |
| RASA1        | -1.05801 | 2.51E-97  |
| WDR77        | 1.067612 | 1.33E-89  |
| LRIF1        | -3.03172 | 3.70E-79  |
| STRIP1       | -1.40792 | 7.68E-45  |
| AMIGO1       | -1.91034 | 9.94E-08  |
| ATXN7L2      | -2.82595 | 1.15E-18  |
| GPSM2        | -1.39714 | 2.26E-54  |
| PRPF38B      | -1.75977 | 5.95E-137 |
| FAM102B      | -1.62404 | 5.99E-25  |
| VAV3         | -2.79988 | 1.06E-157 |
| PRMT6        | -1.55741 | 1.88E-14  |
| COL11A1      | -1.04474 | 3.09E-105 |
| S1PR1        | -2.09032 | 3.04E-13  |
| SLC30A7      | -1.52381 | 2.89E-67  |
| DPH5         | 1.008523 | 7.37E-24  |
| SASS6        | -2.18926 | 7.50E-83  |
| MFSD14A      | -2.56537 | 5.19E-250 |
| PTBP2        | -1.16535 | 4.98E-16  |
| RWDD3        | -1.0812  | 2.09E-09  |
| CNN3         | -1.1003  | 3.62E-216 |
| F3           | -1.88735 | 2.23E-17  |
| ARHGAP29     | -1.79673 | 0         |
| DNTTIP2      | -1.20111 | 2.93E-75  |
| MTF2         | -2.07963 | 7.38E-85  |
| DIPK1A       | -2.41638 | 2.72E-52  |
| EVI5         | -1.37496 | 1.08E-37  |
| BTBD8        | -1.571   | 6.33E-17  |
| TGFBR3       | -1.33005 | 2.28E-25  |
| HFM1         | -1.38045 | 4.39E-32  |
| ZNF644       | -1.95056 | 1.25E-100 |
| LRRC8D       | -1.0813  | 6.68E-53  |
| LRRC8C       | -1.26992 | 4.28E-36  |
| LYSMD3       | -2.91531 | 9.69E-190 |
| RBMXL1       | -2.72992 | 6.37E-87  |
| GTF2B        | -1.73119 | 6.50E-70  |
| LOC103224490 | -3.22701 | 1.47E-17  |

|              |          |           |
|--------------|----------|-----------|
| LMO4         | -1.6163  | 3.45E-117 |
| MBLAC2       | -1.18037 | 5.23E-24  |
| ZNHIT6       | -2.00612 | 1.12E-41  |
| CCN1         | -2.07052 | 0         |
| BCL10        | -2.65354 | 5.66E-115 |
| C20H1orf52   | -1.54222 | 1.56E-19  |
| SYDE2        | -1.8193  | 3.09E-36  |
| RPF1         | -1.97444 | 1.66E-17  |
| ADGRL2       | -1.77863 | 0         |
| LOC103224561 | -2.38951 | 3.45E-05  |
| DNAJB4       | -1.19248 | 3.35E-56  |
| RABGGTB      | -1.24066 | 6.37E-27  |
| ARRDC3       | -4.5116  | 0         |
| ERICH3       | -1.19733 | 1.13E-09  |
| ANKRD13C     | -1.17913 | 1.53E-98  |
| HHLA3        | -3.03587 | 7.64E-04  |
| LRRC7        | -1.32725 | 3.11E-11  |
| RPE65        | -2.29891 | 3.32E-07  |
| GADD45A      | -1.65505 | 2.27E-63  |
| PDE4B        | -5.02582 | 1.17E-89  |
| LEPR         | -1.04475 | 6.77E-10  |
| NR2F1        | -2.61078 | 4.82E-15  |
| ROR1         | -1.65419 | 5.44E-39  |
| JUN          | -5.4206  | 0         |
| PLPP3        | -1.19971 | 1.61E-40  |
| PARS2        | -2.94029 | 6.47E-65  |
| ACOT11       | 1.408229 | 7.96E-16  |
| CPT2         | -1.89978 | 1.11E-116 |
| TUT4         | -1.41427 | 2.22E-109 |
| KTI12        | -2.7831  | 6.80E-45  |
| CDKN2C       | -1.03152 | 4.24E-27  |
| DMRTA2       | 6.797019 | 9.49E-10  |
| BEND5        | -1.43276 | 4.04E-08  |
| TRABD2B      | -1.86236 | 0         |
| LOC103224857 | -1.41077 | 7.23E-15  |
| FOXD2        | -3.57006 | 2.92E-21  |
| LURAP1       | -3.45091 | 3.31E-05  |
| PIK3R3       | -2.08995 | 1.38E-67  |
| CCDC17       | 1.342641 | 3.65E-04  |
| MMACHC       | -1.05357 | 4.53E-10  |
| TOE1         | -1.44104 | 1.62E-20  |
| EIF2B3       | 1.124    | 8.35E-39  |
| PTCH2        | 1.627094 | 4.45E-04  |
| RNF220       | -1.00245 | 2.11E-58  |

|              |          |           |
|--------------|----------|-----------|
| KDM4A        | -1.10806 | 3.05E-83  |
| ZNF691       | -1.7528  | 5.41E-18  |
| RIMKLA       | 1.92501  | 2.83E-59  |
| FOXJ3        | -1.36672 | 5.28E-54  |
| EDN2         | -2.58841 | 1.23E-09  |
| FOXO6        | -1.42888 | 1.47E-12  |
| CTPS1        | 1.165698 | 0         |
| LOC103225021 | -2.4953  | 3.53E-04  |
| LNPEP        | -1.42572 | 4.81E-134 |
| ZNF684       | -2.39342 | 5.40E-12  |
| ZFP69        | -1.41311 | 6.57E-11  |
| RLF          | -4.03336 | 1.79E-243 |
| MFSD2A       | 1.417302 | 1.02E-15  |
| MYCL         | -1.57744 | 8.22E-08  |
| LOC103225049 | 1.09908  | 1.69E-04  |
| KIAA0754     | -1.9974  | 4.96E-187 |
| FHL3         | -1.10534 | 3.52E-24  |
| MTF1         | -2.39902 | 2.08E-63  |
| LOC103225095 | -4.08096 | 1.23E-33  |
| ZMYM1        | -1.02864 | 1.02E-16  |
| GJB4         | -1.50123 | 1.12E-32  |
| GJB3         | -1.36535 | 3.82E-106 |
| GJB5         | -1.11387 | 4.26E-05  |
| C20H1orf94   | 2.218943 | 2.11E-09  |
| ZSCAN20      | -2.5116  | 6.40E-26  |
| ZNF362       | -1.27034 | 9.05E-32  |
| TRIM62       | -2.60741 | 1.51E-11  |
| KIAA1522     | -1.1995  | 0         |
| SYNC         | -1.26484 | 9.82E-33  |
| IQCC         | -2.86369 | 6.75E-24  |
| COL16A1      | 1.175874 | 4.01E-11  |
| NKAIN1       | 1.328215 | 3.61E-63  |
| PUM1         | -3.4277  | 0         |
| SDC3         | -1.31695 | 2.49E-180 |
| SRSF4        | -1.22584 | 1.19E-138 |
| YTHDF2       | -3.1023  | 0         |
| GMEB1        | -1.50455 | 3.98E-14  |
| RAB42        | -1.87717 | 6.57E-04  |
| PHACTR4      | -1.7772  | 2.69E-139 |
| SESN2        | -2.73252 | 0         |
| RPA2         | 1.136753 | 3.41E-144 |
| PPP1R8       | -2.62818 | 5.86E-154 |
| FAM76A       | -1.48486 | 3.74E-09  |
| AHDC1        | -2.23227 | 1.25E-164 |

|              |          |           |
|--------------|----------|-----------|
| TENT5B       | -3.32303 | 2.80E-26  |
| LOC103225309 | -1.5213  | 2.70E-15  |
| ARID1A       | -2.2512  | 0         |
| PDIK1L       | -4.02582 | 2.43E-21  |
| PAQR7        | -1.70847 | 6.01E-31  |
| MACO1        | -1.60214 | 3.19E-76  |
| SRRM1        | -1.2891  | 1.83E-150 |
| IFNLR1       | -1.38502 | 1.26E-05  |
| PNRC2        | -4.05511 | 0         |
| ID3          | -3.2655  | 3.18E-241 |
| ZNF436       | -1.90176 | 5.26E-67  |
| LUZP1        | -2.47555 | 7.38E-189 |
| EPHA8        | -2.53837 | 5.87E-06  |
| C1H11orf68   | -1.89604 | 1.09E-92  |
| MUL1         | -2.49132 | 1.60E-100 |
| FAM43B       | -2.87717 | 8.31E-29  |
| OTUD3        | 1.99714  | 8.76E-223 |
| IFFO2        | -2.16712 | 6.24E-101 |
| KLHDC7A      | -3.54172 | 1.72E-167 |
| ARHGEF10L    | -1.83118 | 1.04E-82  |
| FBXO42       | -2.5582  | 1.84E-56  |
| CPLANE2      | 1.090604 | 7.69E-13  |
| RHOT2        | 1.382094 | 4.39E-147 |
| FAM131C      | 1.760596 | 5.81E-05  |
| SPEN         | -3.45458 | 0         |
| DDI2         | -1.7786  | 3.05E-16  |
| RSC1A1       | -1.06234 | 8.89E-18  |
| DNAJC16      | -1.06159 | 4.41E-27  |
| FOSL1        | -1.89019 | 9.28E-43  |
| PRDM2        | -1.81481 | 1.46E-67  |
| DHRS3        | -1.30373 | 4.20E-17  |
| RHBDL1       | 1.818278 | 1.07E-09  |
| CLCN6        | -1.44352 | 1.00E-95  |
| MTHFR        | -1.15855 | 1.07E-51  |
| UBIAD1       | -2.72889 | 1.79E-40  |
| SRM          | 1.166844 | 2.95E-249 |
| MASP2        | -1.58607 | 9.72E-14  |
| PEX14        | -1.19985 | 2.06E-37  |
| SPSB1        | -3.44445 | 2.72E-29  |
| ERRFI1       | -2.57981 | 3.25E-179 |
| PER3         | -1.84508 | 1.85E-74  |
| THAP3        | -1.22794 | 1.93E-26  |
| PHF13        | -3.2838  | 1.41E-152 |
| KLHL21       | -2.04354 | 1.42E-109 |

|              |          |           |
|--------------|----------|-----------|
| NOL9         | -1.00918 | 4.88E-16  |
| TNFRSF25     | 1.237147 | 4.15E-04  |
| CHTF18       | 1.182122 | 3.99E-46  |
| C20H1orf174  | -2.29221 | 6.12E-37  |
| SOX8         | 1.760596 | 5.81E-05  |
| SKI          | -2.95112 | 3.87E-162 |
| ANKRD65      | -2.04001 | 2.58E-126 |
| CPTP         | -1.04253 | 1.70E-18  |
| DVL1         | 1.043228 | 1.55E-114 |
| LOC103225820 | -3.94276 | 3.30E-26  |
| SAMD11       | -1.5262  | 7.26E-07  |
| NOC2L        | 1.119353 | 2.28E-213 |
| PLEKHN1      | 1.154331 | 1.90E-09  |
| VSIG8        | 2.356446 | 1.80E-06  |
| LOC103225896 | -2.62563 | 1.87E-06  |
| STIL         | -1.73483 | 2.18E-57  |
| MACF1        | -1.50789 | 0         |
| LOC103225945 | -4.29445 | 3.12E-71  |
| ZMYM6        | -1.72441 | 3.58E-58  |
| RNF19B       | -1.63185 | 4.48E-29  |
| LOC103225955 | -1.35928 | 6.06E-21  |
| UBE4B        | -1.46085 | 2.47E-171 |
| ATAD3A       | 1.634387 | 5.43E-201 |
| LOC103226004 | -3.84323 | 2.58E-41  |
| ZNF273       | -4.0123  | 9.35E-61  |
| ZNF107       | -2.43276 | 2.52E-15  |
| ZNF680       | -2.28185 | 1.58E-16  |
| ZNF713       | -1.09727 | 2.53E-05  |
| FIGNL1       | -1.79463 | 1.73E-29  |
| UPP1         | 1.389354 | 8.85E-167 |
| TNS3         | -1.3249  | 0         |
| PURB         | -1.98758 | 2.57E-165 |
| LOC103226149 | -1.2859  | 5.12E-87  |
| HECW1        | -1.74553 | 2.27E-10  |
| LOC103226163 | -2.0513  | 1.48E-55  |
| INHBA        | -1.82216 | 0         |
| CRAMP1       | -1.21995 | 4.25E-30  |
| CDK13        | -2.12685 | 0         |
| ELMO1        | 1.549091 | 7.17E-04  |
| KIAA0895     | -1.44975 | 1.16E-111 |
| EEPD1        | -1.29011 | 2.66E-18  |
| HERPUD2      | -1.05703 | 9.66E-87  |
| TBX20        | -1.13741 | 2.69E-04  |
| KBTBD2       | -1.95878 | 6.32E-166 |

|         |          |           |
|---------|----------|-----------|
| AVL9    | -2.33034 | 1.02E-247 |
| EME2    | 1.050286 | 8.94E-05  |
| HOXA13  | -3.58019 | 1.01E-05  |
| HOXA1   | -2.07769 | 1.11E-16  |
| HOXA2   | -1.00672 | 1.23E-19  |
| HOXA3   | -3.28018 | 3.10E-73  |
| HOXA4   | -1.29418 | 9.48E-06  |
| HOXA5   | -4.10146 | 2.69E-46  |
| HOXA6   | -2.10817 | 9.89E-22  |
| HOXA7   | -1.93204 | 1.16E-05  |
| HOXA9   | -1.78342 | 1.49E-99  |
| HOXA10  | -2.23968 | 3.54E-23  |
| FAHD1   | -1.11679 | 4.44E-06  |
| CCDC126 | -1.20894 | 4.88E-05  |
| IL6     | -1.21015 | 1.30E-196 |
| SP4     | -2.33618 | 4.72E-104 |
| SP8     | -3.5098  | 5.16E-14  |
| ITGB8   | -2.06472 | 5.92E-45  |
| AHR     | -2.33395 | 1.63E-77  |
| SNX32   | 1.076025 | 3.30E-05  |
| TBL3    | 1.012455 | 2.51E-89  |
| ARL4A   | -7.04097 | 2.34E-30  |
| GLCCI1  | -1.69037 | 2.46E-34  |
| MIOS    | -1.15464 | 2.16E-83  |
| C1GALT1 | -1.02467 | 1.16E-60  |
| DLX5    | -2.56639 | 5.14E-16  |
| DLX6    | -4.25826 | 1.31E-25  |
| RBM48   | -4.15135 | 1.14E-60  |
| CYP51A1 | -1.37707 | 0         |
| MTERF1  | -3.2058  | 9.34E-43  |
| FZD1    | -2.42374 | 2.00E-94  |
| CLDN12  | -1.23994 | 2.11E-61  |
| DBF4    | -2.44107 | 1.50E-66  |
| PCLO    | -1.59977 | 1.04E-32  |
| CASKIN1 | 1.729871 | 1.84E-07  |
| RSBN1L  | -3.52772 | 7.67E-36  |
| TMEM60  | -2.45091 | 2.66E-11  |
| BRICD5  | 3.549091 | 1.05E-05  |
| NAPEPLD | -1.37222 | 6.88E-24  |
| KMT2E   | -3.38684 | 0         |
| CCDC71L | -3.0865  | 3.79E-21  |
| HBP1    | -2.88734 | 4.28E-87  |
| CBLL1   | -2.31922 | 3.22E-60  |
| PNPLA8  | -1.19204 | 7.52E-28  |

|              |          |           |
|--------------|----------|-----------|
| DNAJB9       | -2.34707 | 1.42E-35  |
| THAP5        | -2.02641 | 1.76E-44  |
| LRRN3        | -2.6901  | 1.70E-230 |
| TMEM168      | -1.20374 | 1.16E-24  |
| BMT2         | -1.6043  | 3.61E-19  |
| TEDC2        | 1.154813 | 7.27E-27  |
| CTTNBP2      | -2.91667 | 2.26E-149 |
| LOC103226788 | -1.22578 | 5.73E-04  |
| ING3         | -1.14021 | 3.99E-05  |
| CADPS2       | -1.07769 | 8.33E-22  |
| WASL         | -1.3201  | 2.82E-57  |
| GPR37        | -1.55044 | 4.26E-04  |
| ZNF800       | -2.66296 | 1.20E-28  |
| GCC1         | -2.22123 | 4.85E-35  |
| HILPDA       | -3.58464 | 1.50E-169 |
| LRGUK        | -1.24023 | 9.14E-07  |
| LOC103226932 | 1.017944 | 0         |
| CYREN        | -1.90408 | 1.93E-46  |
| TMEM140      | -1.58705 | 1.06E-22  |
| CNOT4        | -1.1939  | 5.21E-46  |
| LOC103226962 | 1.031379 | 1.71E-59  |
| KAT5         | -3.9678  | 7.88E-203 |
| TRIM24       | -2.28504 | 0         |
| KIAA1549     | -1.29553 | 1.26E-74  |
| ZC3HAV1      | -2.32659 | 5.43E-202 |
| PKMYT1       | 1.296927 | 2.69E-80  |
| KREMEN2      | -2.4051  | 7.22E-04  |
| TMEM139      | -1.39975 | 3.98E-21  |
| TCAF2        | -2.03587 | 1.96E-18  |
| TCAF1        | -1.17024 | 2.36E-83  |
| ARHGEF5      | -1.23244 | 3.57E-72  |
| LOC103227159 | -4.09476 | 1.03E-04  |
| LOC103227175 | -1.9217  | 3.57E-18  |
| ZNF786       | -2.77284 | 7.94E-22  |
| ZNF398       | -2.85818 | 3.35E-73  |
| ZNF282       | -1.0798  | 1.43E-39  |
| ZNF212       | -3.39577 | 1.00E-77  |
| LOC103227190 | -3.4051  | 4.92E-05  |
| LOC103227191 | -4.15135 | 6.93E-05  |
| ZNF777       | -1.35283 | 2.78E-30  |
| ZNF205       | -1.3199  | 1.54E-21  |
| ZNF746       | -2.25458 | 8.04E-65  |
| ZNF862       | -1.4316  | 1.27E-33  |
| ZNF775       | -2.47932 | 6.36E-34  |

|              |          |           |
|--------------|----------|-----------|
| KMT2C        | -1.39532 | 6.46E-123 |
| HTR5A        | -1.2058  | 1.27E-06  |
| INSIG1       | -3.63424 | 0         |
| RBM33        | -1.09257 | 1.43E-57  |
| ZNF200       | -2.35545 | 1.97E-106 |
| MNX1         | -1.08454 | 3.63E-07  |
| ZNF263       | -2.34063 | 2.19E-79  |
| WDR60        | -1.04272 | 5.04E-18  |
| NPC1L1       | -1.08013 | 7.82E-20  |
| LOC103227384 | -1.52957 | 7.53E-25  |
| LOC103227406 | -2.10802 | 1.60E-13  |
| TIGD7        | -2.62083 | 2.10E-27  |
| EIF1B        | -2.12229 | 5.54E-105 |
| ZNF619       | -1.48679 | 1.84E-06  |
| ZNF621       | -1.51392 | 9.47E-07  |
| LOC103227445 | -2.40074 | 6.78E-04  |
| ZNF174       | -1.93769 | 1.54E-15  |
| SS18L2       | -1.33323 | 1.56E-44  |
| ZSCAN32      | -1.11572 | 6.50E-09  |
| SNRK         | -2.25335 | 7.19E-49  |
| ABHD5        | -1.00068 | 2.47E-37  |
| ZNF197       | -3.03186 | 1.39E-41  |
| ZNF597       | -4.0055  | 8.58E-08  |
| ZNF35        | -2.19167 | 3.20E-21  |
| KIAA1143     | -1.55044 | 7.84E-25  |
| TMEM158      | 1.989664 | 4.91E-05  |
| SLX4         | -1.59109 | 2.73E-23  |
| CCDC12       | -2.24476 | 7.53E-53  |
| SETD2        | -2.85014 | 2.83E-244 |
| CCDC51       | -1.07302 | 6.51E-21  |
| TREX1        | -1.83901 | 2.54E-33  |
| UCN2         | 1.045049 | 1.85E-05  |
| IP6K2        | -1.75393 | 7.90E-99  |
| WDR6         | -1.375   | 1.25E-291 |
| QRICH1       | -2.00077 | 1.19E-256 |
| GLIS2        | -2.96187 | 2.10E-151 |
| CCDC71       | -2.70182 | 6.43E-55  |
| VASN         | -3.15792 | 0         |
| BSN          | -1.12584 | 1.60E-31  |
| TRAIP        | 1.12407  | 3.55E-20  |
| HMOX2        | -1.1645  | 3.81E-36  |
| RBM5         | -1.75932 | 5.95E-226 |
| IFRD2        | 1.291766 | 1.39E-91  |
| UBALD1       | -1.48066 | 9.63E-15  |



|              |          |           |
|--------------|----------|-----------|
| TMEM115      | -2.44865 | 4.62E-173 |
| CISH         | -2.94648 | 1.39E-13  |
| RBM15B       | -4.08221 | 1.49E-211 |
| RRP9         | 1.263365 | 2.24E-85  |
| DUSP7        | -2.33758 | 1.66E-115 |
| WDR82        | -1.44784 | 3.64E-132 |
| ZNF500       | -2.03587 | 4.35E-08  |
| WNT5A        | -1.48214 | 1.09E-97  |
| ARHGEF3      | -1.14481 | 3.30E-18  |
| IL17RD       | -1.05294 | 9.20E-06  |
| DNAH12       | -2.01162 | 1.52E-09  |
| DENND6A      | -1.39705 | 2.29E-54  |
| ABHD6        | -1.14723 | 1.30E-06  |
| KCTD6        | -2.4953  | 2.37E-13  |
| ATXN7        | -1.67742 | 7.44E-40  |
| PRICKLE2     | -1.79226 | 3.53E-240 |
| ADAMTS9      | -2.02712 | 0         |
| KBTBD8       | -2.77284 | 1.59E-11  |
| LOC103227869 | 1.240663 | 1.48E-70  |
| TMF1         | -1.49547 | 1.01E-103 |
| FRMD4B       | -2.70964 | 2.38E-189 |
| LOC103227890 | -2.41429 | 1.40E-12  |
| FOXP1        | -1.63768 | 6.97E-215 |
| RYBP         | -1.95279 | 2.65E-106 |
| EBLN2        | -2.3188  | 2.36E-07  |
| PPP4R2       | -1.88284 | 4.58E-219 |
| CRBN         | -1.59668 | 1.05E-40  |
| BHLHE40      | -5.85757 | 0         |
| SETD5        | -1.67341 | 1.39E-244 |
| JAGN1        | -1.02944 | 4.20E-36  |
| TMEM186      | -3.15965 | 2.86E-62  |
| VGLL4        | -1.08171 | 1.63E-34  |
| IQSEC1       | -1.27135 | 2.78E-166 |
| WNT7A        | -1.24705 | 6.27E-42  |
| USP7         | -1.43543 | 2.37E-216 |
| CCDC174      | -2.36197 | 9.70E-61  |
| C5H16orf72   | -1.7439  | 1.66E-164 |
| NR2C2        | -1.41494 | 1.84E-89  |
| TMCC1        | -1.50439 | 8.34E-93  |
| LOC103228071 | -3.73631 | 2.06E-06  |
| ATF7IP2      | -2.08673 | 2.62E-67  |
| GATA2        | -1.57758 | 5.31E-36  |
| MCM2         | 1.195524 | 0         |
| KLF15        | -5.38165 | 8.34E-11  |

|              |          |           |
|--------------|----------|-----------|
| SLC12A8      | 2.797019 | 5.66E-07  |
| ZNF148       | -1.27616 | 2.69E-81  |
| HSPBAP1      | -1.8108  | 1.15E-10  |
| PARP14       | -1.31357 | 4.00E-56  |
| DTX3L        | -1.97736 | 8.08E-53  |
| WDR5B        | -2.86184 | 4.11E-26  |
| GOLGB1       | -1.20976 | 1.88E-163 |
| STXBP5L      | -1.65281 | 3.46E-60  |
| GSK3B        | -1.29585 | 7.40E-122 |
| LOC103228214 | -1.69545 | 1.31E-04  |
| ZDHHC23      | -1.4953  | 8.48E-06  |
| SOCS1        | -3.45091 | 3.31E-05  |
| USF3         | -3.02985 | 4.22E-28  |
| NEPRO        | -2.51748 | 9.79E-141 |
| TAGLN3       | 5.134054 | 7.11E-04  |
| PLCXD2       | -1.16292 | 2.90E-80  |
| PHLDB2       | -1.18173 | 2.16E-269 |
| NECTIN3      | -1.27697 | 2.19E-52  |
| CBLB         | -1.93772 | 1.79E-154 |
| SNN          | -2.62319 | 1.27E-60  |
| NFKBIZ       | -5.29492 | 0         |
| CEP97        | -1.07258 | 8.13E-18  |
| ZBTB11       | -2.59727 | 2.34E-123 |
| TRMT10C      | -3.22113 | 1.24E-169 |
| LOC103228439 | -1.2291  | 9.05E-68  |
| LNP1         | -1.10491 | 2.87E-04  |
| FILIP1L      | -4.56512 | 2.96E-229 |
| GPR15        | -2.87325 | 4.12E-177 |
| RIOX2        | 1.532603 | 2.16E-50  |
| ZNF654       | -1.73384 | 6.62E-35  |
| C22H3orf38   | -3.20407 | 5.52E-100 |
| ROBO2        | -1.03298 | 2.64E-105 |
| ERCC4        | -2.81412 | 8.34E-68  |
| ZNRD2        | 1.053505 | 1.44E-23  |
| LOC103228631 | -2.69884 | 5.71E-05  |
| LOC103228639 | -2.93786 | 3.72E-06  |
| LOC103228659 | -1.43093 | 2.99E-04  |
| MRTFB        | -1.06076 | 7.54E-73  |
| NRL          | -1.7083  | 7.19E-10  |
| IRF9         | -1.94706 | 2.98E-52  |
| NFATC4       | -1.22584 | 7.95E-12  |
| NOVA1        | -1.75672 | 2.02E-06  |
| STRN3        | -1.18369 | 5.90E-46  |
| EGLN3        | -1.10583 | 8.32E-31  |

|              |          |           |
|--------------|----------|-----------|
| NFKBIA       | -4.17509 | 0         |
| INSM2        | -3.7177  | 1.68E-11  |
| BRMS1L       | -1.33446 | 1.68E-32  |
| NKX2-8       | -1.8569  | 1.61E-04  |
| PAX9         | -2.86595 | 7.22E-15  |
| FOXA1        | -2.39696 | 9.03E-14  |
| FBXO33       | -2.37936 | 3.40E-42  |
| LRFN5        | -1.66036 | 2.54E-21  |
| C24H14orf28  | -2.77284 | 1.19E-15  |
| TOGARAM1     | -1.12768 | 2.89E-21  |
| KLHL28       | -2.0754  | 2.92E-20  |
| FANCM        | -2.4051  | 1.16E-36  |
| MGAT2        | -2.29706 | 5.62E-183 |
| DNAAF2       | -1.63806 | 3.51E-19  |
| ARF6         | -2.87836 | 0         |
| SOS2         | -1.94612 | 4.90E-81  |
| SAV1         | -1.96932 | 6.14E-97  |
| LOC103228964 | -3.84323 | 6.26E-07  |
| FRMD6        | -1.97968 | 0         |
| GPR137C      | -1.06562 | 3.27E-05  |
| BMP4         | -5.4953  | 1.28E-11  |
| CGRRF1       | -1.33401 | 1.41E-16  |
| SOCS4        | -1.29251 | 1.16E-61  |
| MAPK1IP1L    | -1.45291 | 4.12E-130 |
| FBXO34       | -3.983   | 4.93E-214 |
| ATG14        | -2.93817 | 1.43E-52  |
| ITPRIPL2     | -2.11929 | 2.23E-21  |
| NAA30        | -1.8803  | 3.03E-157 |
| ARID4A       | -2.23018 | 1.24E-70  |
| PPM1A        | -1.12261 | 2.21E-75  |
| SIX1         | -2.60066 | 1.58E-28  |
| SIX4         | -2.48066 | 1.22E-14  |
| TRMT5        | -2.78481 | 4.06E-101 |
| SLC25A45     | -1.13334 | 2.56E-13  |
| HIF1A        | -1.27197 | 0         |
| SNAPC1       | -1.44897 | 2.94E-34  |
| GPHB5        | 5.356446 | 1.24E-07  |
| WDR89        | -2.44018 | 8.30E-133 |
| SYNE2        | -1.03274 | 0         |
| AKAP5        | 5.196901 | 0         |
| ZBTB25       | -3.14021 | 3.64E-46  |
| ZBTB1        | -1.70931 | 1.84E-71  |
| HSPA2        | -3.64512 | 1.05E-87  |
| MAX          | -1.09957 | 2.45E-27  |

|              |          |           |
|--------------|----------|-----------|
| MPP5         | -1.12709 | 1.78E-161 |
| LOC103229226 | -3.91034 | 2.83E-07  |
| ZFP36L1      | -4.16195 | 0         |
| LOC103229237 | 2.983831 | 9.11E-04  |
| SUSD6        | -1.92796 | 4.14E-56  |
| LOC103229267 | -1.43475 | 5.56E-05  |
| MED6         | -1.20026 | 1.38E-46  |
| MAP3K9       | -1.63602 | 4.92E-62  |
| LOC103229289 | 3.71259  | 1.18E-04  |
| ZFYVE1       | -1.97526 | 3.52E-126 |
| ELMSAN1      | -3.05539 | 2.76E-144 |
| ENTPD5       | -1.2203  | 6.69E-09  |
| FAM161B      | -1.61011 | 3.60E-08  |
| FCF1         | -1.22279 | 1.24E-24  |
| YLPM1        | -1.35535 | 5.45E-143 |
| RPS6KL1      | 1.166844 | 1.67E-09  |
| ZC2HC1C      | -1.94276 | 1.84E-22  |
| ACSM3        | -1.13677 | 1.08E-23  |
| FOS          | -3.82595 | 1.58E-12  |
| LOC103229355 | -2.4599  | 2.68E-30  |
| TGFB3        | -1.46118 | 6.14E-14  |
| GPATCH2L     | -1.31846 | 2.90E-17  |
| IRF2BPL      | -4.80376 | 3.18E-188 |
| LOC103229379 | -2.4051  | 2.11E-09  |
| CIPC         | -1.13516 | 7.39E-27  |
| SAMD15       | -1.41174 | 7.59E-06  |
| THUMPD1      | -1.42466 | 5.89E-72  |
| DCUN1D3      | -2.49368 | 5.27E-42  |
| GTF2A1       | -1.49185 | 2.97E-59  |
| STON2        | -1.53837 | 5.54E-07  |
| SEL1L        | -2.04574 | 7.60E-297 |
| SPATA7       | -1.20443 | 7.80E-19  |
| FOXN3        | -1.02316 | 5.23E-07  |
| NRDE2        | -2.73566 | 9.10E-114 |
| PPP4R3A      | -1.87427 | 1.43E-231 |
| TRIP11       | -1.34032 | 1.38E-67  |
| RIN3         | -1.41479 | 1.10E-31  |
| GOLGA5       | -1.27024 | 4.33E-67  |
| TMEM251      | -1.63114 | 4.16E-16  |
| BTBD7        | -2.86941 | 0         |
| DICER1       | -2.1247  | 3.13E-240 |
| CDR2         | -1.32628 | 1.47E-42  |
| CDC42EP2     | -2.73512 | 1.99E-62  |
| CCNK         | -1.2058  | 9.32E-25  |

|              |          |           |
|--------------|----------|-----------|
| LOC103229684 | -1.53177 | 1.40E-60  |
| SCNN1B       | 1.268984 | 3.76E-07  |
| HSP90AA1     | 1.04693  | 0         |
| WDR20        | -2.16973 | 2.90E-50  |
| TNFAIP2      | -1.11318 | 1.38E-21  |
| TRMT61A      | 1.179716 | 2.22E-32  |
| BAG5         | -1.16866 | 8.83E-42  |
| PPP1R13B     | -1.21387 | 2.08E-16  |
| AHNAK2       | -1.35214 | 0         |
| GPR132       | -2.01859 | 5.34E-13  |
| CDCA4        | -1.92685 | 1.01E-59  |
| RBBP6        | -3.42154 | 0         |
| TNRC6A       | -2.01569 | 1.15E-196 |
| GCH1         | 1.069099 | 3.20E-04  |
| MLH3         | -1.87175 | 1.61E-22  |
| SPTLC2       | -1.25245 | 5.56E-54  |
| ALKBH1       | -1.86119 | 4.35E-14  |
| HIST3H2A     | -1.53587 | 3.34E-29  |
| TRIM11       | -1.24848 | 1.26E-37  |
| ARHGAP17     | -1.08195 | 2.33E-34  |
| LOC103229976 | -1.85236 | 2.82E-21  |
| LOC103229978 | -1.62083 | 8.18E-08  |
| SDE2         | -2.15955 | 1.72E-28  |
| ZKSCAN2      | -3.19148 | 1.22E-95  |
| FBXO28       | -2.27417 | 4.27E-136 |
| TLR5         | -4.42491 | 3.45E-66  |
| DISP1        | -1.21009 | 4.34E-21  |
| MIA3         | -1.0784  | 1.26E-68  |
| DUSP10       | -3.54894 | 6.79E-19  |
| HLX          | -2.94276 | 7.89E-26  |
| KDM8         | -1.04995 | 6.65E-04  |
| TGFB2        | -2.59072 | 0         |
| GPATCH2      | -1.27647 | 6.32E-13  |
| ESRRG        | -1.29249 | 4.38E-33  |
| SYVN1        | -1.15662 | 2.73E-61  |
| CENPF        | -1.22302 | 0         |
| VASH2        | -1.41255 | 5.96E-275 |
| ATF3         | -2.1718  | 1.68E-100 |
| NEK2         | -1.77734 | 1.18E-58  |
| SLC30A1      | -1.08378 | 7.91E-42  |
| TRAF5        | -1.35266 | 5.13E-12  |
| KCNH1        | 2.249531 | 3.06E-04  |
| C25H1orf74   | -4.19238 | 2.31E-47  |
| YOD1         | -4.19686 | 6.99E-117 |

|              |          |           |
|--------------|----------|-----------|
| C25H1orf116  | -1.86184 | 1.16E-08  |
| PIGR         | 2.278685 | 5.49E-48  |
| IL10         | 4.341947 | 4.04E-04  |
| DYRK3        | -3.41834 | 1.27E-28  |
| SLC45A3      | 1.25546  | 5.28E-41  |
| ELK4         | -1.79283 | 1.39E-27  |
| MFSD4A       | -1.49398 | 6.72E-14  |
| NUAK2        | -2.5693  | 0         |
| DSTYK        | -1.20517 | 1.33E-39  |
| RBBP5        | -1.06846 | 3.09E-22  |
| PPP1R15B     | -3.99333 | 1.99E-248 |
| ZBED6        | -3.50444 | 1.23E-119 |
| ZC3H11A      | -1.58882 | 2.07E-277 |
| BTG2         | -4.49074 | 8.03E-236 |
| KDM5B        | -2.98604 | 4.89E-209 |
| ARL8A        | -2.78888 | 2.98E-141 |
| GPR37L1      | -3.73631 | 2.06E-06  |
| ELF3         | -5.65097 | 0         |
| NAV1         | -1.10954 | 3.89E-134 |
| TNNI1        | 3.567726 | 3.77E-70  |
| INAVA        | -1.20716 | 6.20E-95  |
| CAMSAP2      | -2.10038 | 2.50E-183 |
| DDX59        | -1.11507 | 4.87E-25  |
| ZNF281       | -5.32032 | 5.36E-239 |
| LOC103230365 | -1.6391  | 4.56E-62  |
| CRB1         | -2.24099 | 6.42E-08  |
| ZBTB41       | -1.76569 | 7.17E-49  |
| ASPM         | -2.60734 | 0         |
| RGS2         | -4.40057 | 0         |
| HMCN1        | -1.15718 | 5.31E-09  |
| IVNS1ABP     | -1.06077 | 1.21E-131 |
| SWT1         | -1.10912 | 4.15E-10  |
| RNF2         | -1.17498 | 8.91E-42  |
| EDEM3        | -1.66434 | 1.97E-149 |
| TSEN15       | 1.149112 | 5.32E-58  |
| RGL1         | -1.90805 | 3.13E-125 |
| SLX1A        | -1.24014 | 1.86E-11  |
| RNASEL       | -2.04307 | 1.40E-44  |
| GLUL         | -2.58743 | 0         |
| IER5         | -3.97447 | 4.57E-78  |
| LOC103230489 | -1.26422 | 1.71E-18  |
| KIAA1614     | -1.17903 | 7.20E-08  |
| CEP350       | -1.76676 | 3.48E-127 |
| TOR1AIP2     | -1.26389 | 4.89E-66  |

|              |          |           |
|--------------|----------|-----------|
| ABL2         | -2.67855 | 3.68E-92  |
| RASAL2       | -1.12028 | 7.13E-26  |
| ZBTB37       | -2.17883 | 2.59E-05  |
| PIGC         | -1.63162 | 9.96E-37  |
| FMO4         | -1.34753 | 3.49E-15  |
| GORAB        | -1.62568 | 6.24E-17  |
| METTL18      | -3.47839 | 6.12E-55  |
| ATP1B1       | -1.15612 | 4.74E-274 |
| ADCY10       | -2.23227 | 1.32E-05  |
| TADA1        | -3.14362 | 2.44E-109 |
| POGK         | -2.43316 | 1.31E-130 |
| RHOU         | -2.27873 | 4.66E-07  |
| CCSAP        | -2.52891 | 2.11E-15  |
| ACTA1        | -2.15135 | 3.81E-04  |
| URB2         | -1.66088 | 6.96E-39  |
| FAM89A       | 1.163563 | 1.52E-27  |
| SPRTN        | -1.31652 | 8.31E-16  |
| EXOC8        | -3.76728 | 7.60E-71  |
| EGLN1        | -1.23993 | 3.40E-53  |
| MAP3K21      | -1.67079 | 3.72E-22  |
| PAGR1        | -1.25124 | 1.42E-37  |
| IRF2BP2      | -4.49031 | 0         |
| ARID4B       | -2.67624 | 4.61E-277 |
| LYST         | -1.29306 | 1.52E-43  |
| ZNHIT2       | -2.55044 | 1.59E-12  |
| AKT3         | -1.07272 | 4.54E-117 |
| ZBTB18       | -3.69986 | 7.25E-188 |
| KIF26B       | -1.10491 | 2.87E-04  |
| ZNF48        | -1.92664 | 4.95E-19  |
| KIF28P       | -1.56312 | 1.58E-08  |
| ZNF670       | -2.33843 | 1.68E-07  |
| ZNF124       | -3.11387 | 5.44E-10  |
| LOC103230923 | -1.89002 | 2.20E-10  |
| DCTPP1       | 1.113026 | 4.86E-161 |
| ZNF496       | -1.01462 | 7.31E-27  |
| LOC103230939 | -1.17382 | 9.74E-43  |
| LOC103230963 | -2.3069  | 1.56E-31  |
| PGBD2        | -3.86595 | 8.90E-19  |
| SRCAP        | -1.50672 | 1.05E-184 |
| H3F3A        | -2.0355  | 1.20E-113 |
| WDR26        | -1.13095 | 5.06E-192 |
| PRRC2C       | -1.16109 | 1.15E-222 |
| AHCTF1       | -2.02031 | 4.93E-197 |
| ZNF629       | -1.13554 | 8.57E-47  |

|              |          |           |
|--------------|----------|-----------|
| WHAMM        | -1.78939 | 4.31E-17  |
| ALPK3        | -1.5327  | 2.42E-07  |
| ZNF592       | -1.46413 | 3.87E-95  |
| ZSCAN2       | -1.5567  | 5.06E-11  |
| AKAP13       | -2.08081 | 0         |
| DET1         | -1.22944 | 1.20E-16  |
| AEN          | -1.65506 | 9.71E-82  |
| PEX11A       | -2.25826 | 3.23E-09  |
| PLIN1        | -1.83697 | 2.12E-08  |
| SEMA4B       | -1.05911 | 1.48E-33  |
| SETD1A       | -1.67352 | 6.75E-122 |
| GDPGP1       | -3.4953  | 1.26E-09  |
| ZNF774       | -2.0089  | 1.26E-23  |
| CHD2         | -2.77058 | 0         |
| LOC103231220 | -1.16363 | 8.42E-07  |
| PRSS53       | 2.549091 | 6.83E-04  |
| NR2F2        | -2.76249 | 6.06E-44  |
| ARRDC4       | -2.11007 | 1.04E-114 |
| ZNF646       | -2.85652 | 4.76E-82  |
| ZNF668       | -2.77284 | 2.92E-38  |
| LYSMD4       | -3.72393 | 9.96E-17  |
| ASB7         | -2.16663 | 2.40E-67  |
| CHSY1        | -1.94733 | 6.29E-28  |
| LOC103231340 | 1.63122  | 1.52E-53  |
| LOC103231342 | -4.80176 | 1.93E-07  |
| LOC103231344 | -1.05471 | 5.23E-37  |
| PNP          | 1.221582 | 2.27E-140 |
| TMEM253      | -1.48653 | 5.89E-05  |
| CHD8         | -1.41599 | 4.92E-255 |
| SALL2        | -3.46941 | 1.35E-189 |
| ARMC5        | -2.57744 | 4.86E-51  |
| ABHD4        | -1.03493 | 9.38E-122 |
| C29H14orf93  | -1.13163 | 9.63E-18  |
| C29H14orf119 | -2.26907 | 4.71E-89  |
| RNF212B      | -4.09476 | 2.60E-08  |
| HOMER        | -3.71713 | 3.06E-170 |
| NGDN         | -1.85917 | 1.18E-41  |
| ZFH2         | -3.42245 | 5.51E-64  |
| TICRR        | -1.69212 | 4.68E-37  |
| ZNF267       | -4.17883 | 1.93E-54  |
| ZBED1        | -1.04773 | 7.18E-34  |
| SHROOM2      | -2.25104 | 7.97E-163 |
| TCEANC       | -3.3578  | 1.31E-08  |
| ZRSR2        | -1.13856 | 2.96E-13  |



|              |          |           |
|--------------|----------|-----------|
| CDKL5        | -1.72393 | 1.62E-14  |
| BCLAF3       | -1.73867 | 8.14E-28  |
| MAP7D2       | -1.1368  | 1.07E-05  |
| LOC103231695 | -1.38735 | 3.15E-51  |
| SMS          | -1.40979 | 0         |
| KLHL15       | -1.86431 | 1.46E-38  |
| GK           | -1.07425 | 6.70E-13  |
| CREBBP       | -1.83713 | 2.90E-104 |
| MID1IP1      | -2.13299 | 2.37E-72  |
| BCOR         | -3.57469 | 1.76E-136 |
| DDX3X        | -1.99093 | 0         |
| USP9X        | -1.10664 | 0         |
| FUNDC1       | -1.08269 | 9.23E-35  |
| KDM6A        | -1.40461 | 1.92E-93  |
| PALB2        | -4.01569 | 1.95E-140 |
| JADE3        | -1.44546 | 3.89E-153 |
| LOC103231885 | -1.38252 | 9.29E-10  |
| ZNF41        | -2.2058  | 8.77E-25  |
| ZNF182       | -1.00248 | 4.23E-16  |
| LOC103231911 | -1.20026 | 1.08E-07  |
| LOC103231919 | -1.07846 | 1.20E-16  |
| TBC1D25      | -1.2609  | 6.64E-21  |
| SUV39H1      | -1.00238 | 2.42E-21  |
| PIM2         | -1.56071 | 3.10E-22  |
| CCDC120      | -1.71561 | 1.00E-30  |
| BATF2        | -1.23113 | 3.55E-12  |
| SHROOM4      | -1.46848 | 5.58E-20  |
| MAGEH1       | -1.12076 | 2.39E-05  |
| USP51        | -2.30889 | 4.75E-06  |
| UBQLN2       | -2.04943 | 2.99E-132 |
| LOC103232061 | -1.87071 | 1.83E-209 |
| SPIN4        | -1.4618  | 3.18E-13  |
| AMER1        | -1.45091 | 3.88E-10  |
| EDA2R        | -1.23797 | 1.62E-77  |
| EFNB1        | -1.63924 | 2.62E-110 |
| PJA1         | -2.29982 | 1.12E-27  |
| EDA          | -1.14908 | 4.24E-11  |
| GCNA         | -1.93634 | 6.36E-05  |
| RTL5         | -1.64185 | 4.39E-27  |
| ERCC6L       | -2.94719 | 1.71E-161 |
| CITED1       | 3.134054 | 3.01E-05  |
| RLIM         | -2.36129 | 2.63E-72  |
| MAGEE1       | -2.37691 | 5.04E-21  |
| DNAJA2       | -1.14858 | 5.83E-82  |

|              |          |           |
|--------------|----------|-----------|
| LOC103232262 | -1.66214 | 2.03E-77  |
| HDX          | -1.2838  | 1.58E-07  |
| PABPC5       | -4.05082 | 1.34E-28  |
| PCDH11X      | 2.451837 | 0         |
| HNRNPH2      | -1.27637 | 2.42E-124 |
| ARMCX4       | -1.39822 | 2.08E-80  |
| LOC103232367 | 7.610436 | 2.08E-15  |
| GPRASP1      | -1.252   | 2.13E-09  |
| LOC103232389 | 1.829199 | 3.05E-04  |
| BEX4         | -1.08022 | 6.73E-56  |
| TCEAL1       | -1.15471 | 2.05E-21  |
| RAB9B        | -1.42265 | 6.29E-21  |
| PWWP3B       | -2.74859 | 3.22E-07  |
| SIAH1        | -2.79076 | 6.69E-60  |
| CLDN2        | -1.52007 | 2.91E-57  |
| RBM41        | 3.230572 | 0         |
| TSC22D3      | -2.41526 | 0         |
| VSIG1        | 1.847817 | 2.45E-04  |
| RTL9         | -2.52286 | 1.97E-18  |
| N4BP1        | -1.30602 | 1.24E-53  |
| APLN         | 2.257629 | 3.12E-17  |
| BCORL1       | -2.00214 | 7.98E-99  |
| RAB33A       | -4.2058  | 4.63E-05  |
| ZNF75D       | -1.03587 | 1.52E-06  |
| CNEP1R1      | -2.79938 | 3.23E-75  |
| ZIC3         | -3.17883 | 3.77E-26  |
| LOC103232720 | -2.43713 | 2.93E-10  |
| MTM1         | -1.17635 | 5.42E-20  |
| SALL1        | -3.60741 | 6.50E-71  |
| ZNF275       | -1.23211 | 5.39E-41  |
| CHD9         | -1.33261 | 2.67E-113 |
| ZFX          | -1.74864 | 8.98E-28  |
| USP27X       | -3.32865 | 3.16E-19  |
| IRX3         | -3.40138 | 8.59E-13  |
| IRX5         | -4.09476 | 2.60E-08  |
| LPCAT2       | -1.09277 | 2.26E-06  |
| LOC103233030 | 1.09141  | 8.94E-14  |
| LOC103233031 | 1.237963 | 2.26E-31  |
| LOC103233043 | 1.165116 | 6.06E-22  |
| MT1X         | -1.05082 | 2.11E-06  |
| HERPUD1      | -1.66654 | 1.08E-128 |
| RSPRY1       | -2.57037 | 3.35E-299 |
| KATNB1       | 1.066172 | 9.63E-94  |
| ZNF319       | -1.10471 | 1.29E-25  |

|              |          |           |
|--------------|----------|-----------|
| USB1         | 1.213536 | 9.92E-114 |
| CMTM2        | 5.134054 | 7.11E-04  |
| PDP2         | -2.39432 | 5.88E-141 |
| RRAD         | -2.83338 | 1.32E-16  |
| FA2H         | -1.08478 | 2.78E-06  |
| RFWD3        | -1.22824 | 5.14E-52  |
| CMTR2        | -3.60741 | 4.55E-43  |
| MARVELD3     | 3.685502 | 2.62E-06  |
| CHST4        | -1.75672 | 2.02E-06  |
| ZNF19        | -3.57429 | 7.86E-33  |
| AP1G1        | -1.34614 | 2.63E-226 |
| ATXN1L       | -1.59341 | 3.21E-134 |
| ZFH3         | -1.81595 | 5.43E-191 |
| NOB1         | -1.07087 | 1.83E-55  |
| PDF          | 1.018089 | 1.11E-16  |
| COG8         | -1.54856 | 1.32E-74  |
| LOC103233222 | -4.62182 | 4.15E-21  |
| ZFP90        | -1.11295 | 4.44E-47  |
| SMPD3        | -1.74159 | 3.58E-09  |
| DDX28        | -3.5603  | 1.47E-63  |
| THAP11       | -1.98972 | 7.88E-74  |
| CTCF         | -1.48306 | 4.22E-103 |
| C5H16orf70   | -2.75405 | 3.82E-84  |
| ZFP1         | -3.89937 | 2.65E-37  |
| BCAR1        | -2.18735 | 2.69E-217 |
| TMEM170A     | -1.24532 | 4.39E-05  |
| MON1B        | -1.13576 | 2.88E-36  |
| MAF          | -2.97447 | 7.73E-09  |
| C5H16orf46   | -1.91034 | 4.81E-04  |
| ATMIN        | -2.28591 | 1.81E-114 |
| GAN          | -1.09263 | 1.58E-20  |
| SDR42E1      | -1.89569 | 1.53E-39  |
| MLYCD        | -1.59986 | 2.35E-36  |
| OSGIN1       | -1.15517 | 4.55E-13  |
| NECAB2       | 2.461629 | 1.10E-09  |
| LOC103233384 | -1.33693 | 2.06E-04  |
| MEAK7        | -1.05247 | 5.30E-13  |
| CRISPLD2     | -1.87739 | 1.19E-109 |
| FERMT3       | 1.347458 | 3.31E-08  |
| C5H16orf74   | 1.041058 | 1.22E-16  |
| FOXC2        | -4.94276 | 4.07E-15  |
| FBXO31       | -1.00935 | 6.78E-46  |
| ZCCHC14      | -1.3897  | 5.28E-107 |
| SLC7A5       | 1.695231 | 0         |

|              |          |           |
|--------------|----------|-----------|
| ZFPM1        | -2.08478 | 8.05E-28  |
| ZC3H18       | -1.55488 | 3.82E-118 |
| CDT1         | -1.47303 | 4.89E-67  |
| CBFA2T3      | -1.93984 | 7.54E-18  |
| LOC103233468 | 3.549091 | 9.29E-09  |
| ZNF778       | -1.90556 | 8.64E-41  |
| CDK10        | 1.014813 | 6.84E-45  |
| FLRT1        | -2.71394 | 6.84E-11  |
| LOC103233485 | 1.219014 | 5.73E-47  |
| LOC103233486 | 2.001604 | 1.59E-06  |
| SLC25A22     | 1.256484 | 1.83E-89  |
| ODF3L2       | -1.0929  | 2.16E-23  |
| ARID3A       | -1.67587 | 8.30E-22  |
| MISP         | -1.83296 | 4.28E-123 |
| MIDN         | -3.3116  | 1.66E-195 |
| EFNA2        | -1.69377 | 3.80E-09  |
| ADAT3        | -2.55943 | 1.01E-07  |
| MOB3A        | -1.55338 | 2.62E-39  |
| MKNK2        | -1.59544 | 4.37E-197 |
| GADD45B      | -2.33553 | 1.13E-295 |
| ZNF554       | -2.68357 | 1.42E-10  |
| ZNF555       | -3.2375  | 1.00E-17  |
| ZNF57        | -2.9587  | 3.13E-11  |
| LOC103233665 | -2.82595 | 1.15E-18  |
| LOC103233674 | -1.82942 | 2.19E-04  |
| TBXA2R       | -1.08366 | 3.43E-04  |
| MATK         | 1.295598 | 1.15E-20  |
| LRG1         | -3.45091 | 1.95E-25  |
| PLIN4        | -2.15492 | 2.46E-32  |
| ZBTB7A       | -2.08834 | 2.47E-125 |
| TNFAIP8L1    | -1.47809 | 2.02E-18  |
| FEM1A        | -3.79609 | 4.98E-111 |
| TICAM1       | -4.74246 | 1.29E-72  |
| KDM4B        | -1.16322 | 5.77E-88  |
| SAFB         | -1.92985 | 0         |
| SAFB2        | -1.6546  | 7.26E-113 |
| LOC103233755 | -1.83067 | 3.58E-04  |
| CAPS         | -1.09133 | 2.74E-27  |
| ZNF557       | -1.45605 | 7.94E-14  |
| CAMSAP3      | -2.02834 | 1.83E-28  |
| LRRC8E       | -2.08358 | 2.42E-53  |
| ZNF558       | -3.25826 | 6.57E-45  |
| ZNF317       | -3.1575  | 4.65E-56  |
| ZNF699       | -4.77284 | 1.95E-13  |

|              |          |           |
|--------------|----------|-----------|
| ZNF266       | -4.41669 | 1.04E-19  |
| ZNF121       | -2.57192 | 1.76E-09  |
| LOC103233870 | -2.46471 | 3.68E-58  |
| ZNF846       | -1.00111 | 3.36E-04  |
| ZNF562       | -1.2815  | 8.92E-13  |
| S1PR2        | 1.612769 | 2.57E-21  |
| ZBTB3        | -5.65058 | 2.06E-24  |
| S1PR5        | -3.37374 | 1.70E-12  |
| TIMM29       | -1.1759  | 5.43E-27  |
| KANK2        | -1.61864 | 0         |
| ANGPTL8      | -2.38808 | 1.27E-30  |
| EPOR         | -1.97447 | 2.55E-04  |
| SWSAP1       | -3.63413 | 4.40E-44  |
| ZNF653       | -1.42953 | 6.45E-13  |
| ZNF627       | -3.64918 | 9.38E-69  |
| ZNF823       | -7.38165 | 3.05E-37  |
| LOC103233944 | -3.03738 | 9.19E-23  |
| LOC103233945 | -2.73631 | 4.08E-13  |
| LRRN4CL      | -1.85616 | 7.39E-51  |
| LOC103233952 | -1.63678 | 5.02E-06  |
| ZNF136       | -2.30436 | 1.55E-14  |
| ZNF44        | -3.5323  | 1.19E-31  |
| ZNF709       | -4.53837 | 2.12E-11  |
| LOC103233973 | -6.21246 | 2.98E-35  |
| ZNF490       | -3.55943 | 3.89E-10  |
| C1H11orf83   | 1.227163 | 1.04E-77  |
| JUNB         | -6.41689 | 0         |
| INTS5        | -2.79203 | 1.16E-118 |
| IER2         | -2.48918 | 8.69E-141 |
| DNAJB1       | -3.01554 | 0         |
| ZNF333       | -1.26853 | 2.62E-06  |
| TUT1         | -1.18155 | 1.81E-18  |
| RAB8A        | -1.22888 | 6.09E-80  |
| CHERP        | -1.12951 | 5.64E-68  |
| MED26        | -3.2394  | 1.54E-37  |
| F2RL3        | 5.71259  | 2.61E-05  |
| HAUS8        | -1.40568 | 6.49E-28  |
| ANKLE1       | 4.216984 | 1.46E-06  |
| MAP1S        | -1.64713 | 2.34E-75  |
| RAB3A        | -2.26561 | 2.23E-17  |
| IQC�         | -2.45091 | 2.66E-34  |
| JUND         | -3.80655 | 0         |
| GDF15        | -2.25663 | 6.17E-73  |
| ELL          | -2.15806 | 1.24E-67  |

|              |          |           |
|--------------|----------|-----------|
| KLHL26       | -2.0731  | 3.13E-47  |
| DDX49        | 1.087554 | 2.37E-68  |
| ZNF14        | -5.50619 | 3.57E-22  |
| ZNF101       | -3.13273 | 3.71E-10  |
| TSSK6        | -2.4051  | 7.22E-04  |
| LOC103234233 | -2.2964  | 2.14E-20  |
| ZNF253       | -1.68357 | 2.14E-06  |
| LOC103234239 | -4.99286 | 2.03E-08  |
| LOC103234241 | -3.38079 | 3.92E-20  |
| LOC103234249 | -2.69037 | 3.42E-18  |
| LOC103234255 | -3.60741 | 3.37E-15  |
| DAGLA        | -1.30797 | 1.06E-60  |
| LOC103234265 | -2.10912 | 8.68E-09  |
| LOC103234275 | -1.41774 | 7.24E-05  |
| ZNF675       | -5.47328 | 1.86E-11  |
| MIER2        | -1.64702 | 6.30E-46  |
| APC2         | -1.15839 | 9.86E-37  |
| PIAS4        | -1.88644 | 2.57E-59  |
| YJU2         | -1.42152 | 9.81E-12  |
| QTRT1        | 1.229183 | 3.95E-30  |
| LDLR         | -1.66017 | 0         |
| ZNF441       | -4.06562 | 4.28E-15  |
| ZNF791       | -5.25826 | 9.23E-19  |
| ZSWIM4       | -1.07827 | 1.12E-17  |
| RFX1         | -1.15802 | 2.86E-18  |
| LOC103234377 | -1.00248 | 1.20E-08  |
| PGPEP1       | -1.3578  | 1.23E-06  |
| CRACR2B      | 2.175277 | 1.98E-17  |
| POP4         | -1.30084 | 4.16E-18  |
| PLEKHF1      | -2.79076 | 1.29E-09  |
| ZNF507       | -1.97663 | 3.85E-93  |
| RHPN2        | -1.20204 | 1.73E-87  |
| CEBPA        | -1.45091 | 1.69E-15  |
| LOC103234473 | -1.56874 | 4.35E-12  |
| LOC103234475 | -1.67317 | 1.58E-13  |
| WTIP         | 1.164232 | 2.42E-30  |
| ZNF599       | -5.41669 | 6.97E-21  |
| ZNF792       | -2.12333 | 5.03E-05  |
| FFAR2        | 5.134054 | 7.11E-04  |
| KMT2B        | -2.40463 | 7.19E-136 |
| LIN37        | -2.25494 | 1.76E-36  |
| NFKBID       | -3.03587 | 2.48E-09  |
| LRFN3        | -3.31244 | 9.25E-51  |
| SDHAF1       | -2.0055  | 3.89E-11  |

|              |          |           |
|--------------|----------|-----------|
| ZNF565       | -2.03587 | 5.91E-09  |
| ZNF146       | -1.34251 | 3.07E-116 |
| TSPAN4       | 1.082578 | 6.36E-88  |
| ZFP82        | -2.88831 | 3.45E-15  |
| ZNF260       | -1.31904 | 1.34E-24  |
| ZNF567       | -2.95341 | 3.70E-16  |
| ZNF382       | -1.13103 | 1.92E-05  |
| ZNF345       | -1.60291 | 2.66E-05  |
| ZNF420       | -3.26853 | 3.18E-18  |
| LOC103234590 | -1.77424 | 4.86E-11  |
| ZNF585B      | -2.96807 | 3.89E-14  |
| ZNF383       | -2.62971 | 4.26E-17  |
| ZNF875       | -4.24532 | 2.25E-33  |
| ZNF570       | -2.83338 | 1.32E-16  |
| C6H19orf33   | 1.891979 | 3.98E-11  |
| GGN          | -2.08318 | 9.31E-06  |
| LRFN1        | -1.9587  | 5.02E-26  |
| ZFP36        | -4.29849 | 9.13E-102 |
| EID2B        | -2.554   | 6.73E-45  |
| EID2         | -2.35459 | 1.00E-39  |
| DYRK1B       | -1.1916  | 1.91E-39  |
| ZNF546       | -1.38502 | 1.26E-05  |
| SERTAD1      | -2.99729 | 4.33E-79  |
| SERTAD3      | -4.88554 | 2.40E-107 |
| C6H19orf54   | -1.6466  | 1.07E-55  |
| ARHGEF1      | 1.11112  | 4.00E-119 |
| ZNF574       | -2.94632 | 6.37E-90  |
| ZNF526       | -3.2838  | 2.66E-56  |
| DEDD2        | -1.64611 | 6.08E-66  |
| ERF          | -2.62849 | 2.67E-166 |
| CIC          | -1.29933 | 6.11E-229 |
| CEACAM8      | 4.009479 | 4.10E-29  |
| PHLDB3       | -1.32776 | 5.66E-17  |
| SRRM5        | -1.91393 | 4.56E-04  |
| ZNF45        | -1.5323  | 1.09E-12  |
| ZNF221       | -2.45091 | 2.09E-08  |
| ZNF234       | -1.19199 | 6.45E-09  |
| ZNF225       | -1.07149 | 1.44E-04  |
| ZNF284       | -3.62083 | 1.20E-10  |
| LOC103234816 | -1.62563 | 1.01E-48  |
| ZNF226       | -2.84684 | 1.72E-43  |
| ZNF235       | -2.97447 | 1.76E-16  |
| ZNF112       | -2.53306 | 1.57E-26  |
| ZNF285       | -2.58019 | 1.41E-14  |

|              |          |           |
|--------------|----------|-----------|
| ZNF180       | -3.38165 | 6.34E-24  |
| BCL3         | -3.28004 | 2.54E-186 |
| BCAM         | -1.21622 | 3.33E-87  |
| TOMM40       | 1.31384  | 0         |
| BLOC1S3      | -2.03587 | 2.38E-06  |
| CD3EAP       | -1.52185 | 3.72E-26  |
| PPP1R13L     | -1.13627 | 1.77E-37  |
| OPA3         | -1.68303 | 8.33E-16  |
| FBXO46       | -2.04627 | 5.00E-23  |
| SIX5         | -1.4472  | 6.99E-53  |
| OSBP         | -1.68988 | 8.07E-251 |
| FOXA3        | -1.80141 | 2.97E-04  |
| IRF2BP1      | -2.92896 | 6.15E-86  |
| NOVA2        | -2.60471 | 2.23E-18  |
| CCDC8        | -3.35602 | 3.66E-200 |
| ARHGAP35     | -1.67707 | 5.44E-247 |
| ZC3H4        | -4.14826 | 1.52E-134 |
| BBC3         | -5.37232 | 4.43E-267 |
| BICRA        | -3.98489 | 4.99E-40  |
| EHD2         | -1.28741 | 7.04E-05  |
| DBP          | -1.80386 | 1.46E-15  |
| KCNA7        | 3.046403 | 3.62E-07  |
| PRR12        | -3.52237 | 3.52E-173 |
| SCAF1        | -1.06502 | 1.25E-91  |
| NUP62        | -1.30501 | 5.75E-82  |
| ZNF473       | -1.97447 | 4.89E-66  |
| MYBPC2       | -1.56639 | 9.90E-04  |
| LRRC4B       | -1.13896 | 1.03E-04  |
| CLEC11A      | -1.04386 | 5.40E-06  |
| ZFP91        | -1.25881 | 1.07E-95  |
| CTU1         | -1.92896 | 1.21E-11  |
| VSIG10L      | -1.10072 | 1.84E-06  |
| ZNF175       | -1.45431 | 3.01E-20  |
| ZNF613       | -5.3578  | 4.54E-20  |
| ZNF649       | -1.91034 | 1.58E-05  |
| ZNF577       | -1.2235  | 5.91E-04  |
| ZNF350       | -2.65254 | 2.60E-19  |
| ZNF614       | -3.52416 | 4.03E-27  |
| ZNF841       | -2.6733  | 2.50E-12  |
| ZNF836       | -2.78719 | 1.10E-11  |
| ZNF616       | -1.77284 | 2.43E-05  |
| ZNF766       | -3.2235  | 3.14E-40  |
| ZNF347       | -2.77284 | 1.19E-15  |
| LOC103235192 | -1.43073 | 3.00E-04  |



|              |          |           |
|--------------|----------|-----------|
| ZNF808       | -2.23311 | 9.84E-07  |
| ZNF331       | -2.91688 | 3.50E-25  |
| MYADM        | -1.63887 | 1.26E-52  |
| TMC4         | -1.19634 | 6.13E-05  |
| LENG1        | -1.71525 | 8.50E-14  |
| LENG9        | 2.137322 | 1.30E-04  |
| KMT5C        | -1.88275 | 5.66E-18  |
| TMEM190      | 1.631554 | 1.38E-09  |
| TMEM238      | -1.08318 | 9.24E-04  |
| ZNF628       | -3.04016 | 3.27E-39  |
| ZNF579       | -2.94445 | 5.49E-48  |
| FIZ1         | -1.30452 | 7.46E-17  |
| ZNF524       | -1.18362 | 1.44E-08  |
| ZNF865       | -1.86369 | 2.23E-28  |
| ZNF784       | -4.05379 | 1.66E-35  |
| ZNF581       | -2.41464 | 3.73E-202 |
| ZDHC5        | -1.61396 | 1.09E-240 |
| ZNF787       | -1.30889 | 1.21E-26  |
| CLP1         | -3.63854 | 3.37E-87  |
| ZNF667       | -1.75347 | 6.72E-10  |
| ZNF583       | -2.17337 | 2.49E-06  |
| ZNF582       | -2.97447 | 2.15E-11  |
| ZNF471       | -1.05724 | 2.67E-12  |
| ZNF71        | -3.60066 | 5.61E-29  |
| ZNF264       | -3.58019 | 1.01E-05  |
| ZNF805       | -1.59596 | 4.26E-07  |
| ZNF304       | -3.2375  | 3.49E-34  |
| ZNF547       | -4.2058  | 8.35E-17  |
| LOC103235394 | -2.8077  | 4.06E-04  |
| ZNF17        | -3.2058  | 1.28E-23  |
| ZNF549       | -2.52332 | 8.18E-28  |
| ZNF211       | -1.99656 | 1.62E-26  |
| ZNF134       | -3.89258 | 7.72E-79  |
| ZNF416       | -5.17883 | 8.98E-18  |
| ZNF606       | -4.4051  | 9.32E-06  |
| LOC103235422 | -3.19148 | 1.79E-48  |
| RTN4RL2      | -1.43276 | 5.75E-22  |
| LOC103235424 | -2.94276 | 7.89E-26  |
| ZNF776       | -2.0327  | 9.56E-34  |
| LOC103235431 | -4.30889 | 4.46E-35  |
| ZNF551       | -2.34399 | 4.22E-10  |
| ZNF329       | -1.54763 | 1.53E-10  |
| ZNF274       | -2.8553  | 2.18E-39  |
| ZNF8         | -2.3638  | 5.17E-22  |

|              |          |           |
|--------------|----------|-----------|
| ZSCAN22      | -2.69884 | 1.52E-14  |
| ZNF837       | -2.19814 | 1.23E-08  |
| ZNF446       | -1.27046 | 3.63E-27  |
| LOC103235452 | -2.81116 | 4.20E-29  |
| ZBTB45       | -1.17941 | 2.14E-21  |
| TRIM28       | 1.090797 | 0         |
| MZF1         | 1.122277 | 6.69E-12  |
| TNKS1BP1     | -2.01135 | 4.32E-227 |
| CCNE1        | 1.205205 | 9.68E-64  |
| CEBPG        | -1.98394 | 1.84E-80  |
| LOC103235514 | -1.38165 | 3.06E-06  |
| LOC103235575 | -1.60934 | 1.08E-07  |
| ZNF584       | -1.32669 | 1.63E-15  |
| LOC103235581 | -4.94276 | 3.77E-08  |
| YTHDC1       | -1.34749 | 2.66E-109 |
| CENPC        | -1.4934  | 7.14E-19  |
| REST         | -1.92059 | 4.47E-76  |
| AASDH        | -1.43398 | 4.30E-53  |
| CEP135       | -1.68868 | 5.69E-17  |
| TMEM165      | -1.25738 | 1.75E-59  |
| CHIC2        | -1.23227 | 9.17E-11  |
| RASL11B      | -4.67008 | 8.87E-24  |
| LRRC66       | 4.549091 | 1.15E-04  |
| UTP3         | -3.25966 | 1.36E-125 |
| ANKRD17      | -2.11626 | 0         |
| CXCL8        | 3.201168 | 7.86E-09  |
| CXCL1        | 1.85842  | 8.02E-12  |
| CXCL3        | 2.442176 | 1.45E-04  |
| SDAD1        | -1.12687 | 4.16E-38  |
| STBD1        | -3.13183 | 1.32E-247 |
| SHROOM3      | -1.68357 | 3.00E-27  |
| CCNG2        | -3.65385 | 1.40E-204 |
| CNOT6L       | -2.4181  | 7.53E-228 |
| BMP2K        | -1.33309 | 1.14E-153 |
| PRDM8        | -3.42819 | 4.06E-09  |
| FGF5         | -1.72763 | 1.86E-53  |
| RASGEF1B     | -4.61414 | 1.37E-33  |
| PTPRJ        | -1.1984  | 2.04E-54  |
| HNRNPD       | -1.0271  | 4.96E-234 |
| THAP9        | -1.45783 | 2.29E-29  |
| FNBP4        | -2.18089 | 2.00E-124 |
| LIN54        | 2.440831 | 0         |
| HELQ         | -2.90721 | 5.83E-51  |
| CDS1         | -1.252   | 2.13E-09  |

|              |          |           |
|--------------|----------|-----------|
| WDFY3        | -1.62242 | 1.13E-239 |
| ARHGAP24     | -2.17189 | 1.19E-61  |
| AFF1         | -2.46214 | 1.06E-82  |
| PYURF        | -1.12198 | 1.58E-44  |
| NAP1L5       | -1.96778 | 4.52E-38  |
| TIGD2        | -3.13896 | 3.45E-28  |
| GPRIN3       | -2.05223 | 1.57E-84  |
| SMARCAD1     | -1.98289 | 1.99E-167 |
| KBTBD4       | -1.40484 | 1.04E-58  |
| EIF4E        | -1.48528 | 2.21E-128 |
| TET2         | -2.27508 | 3.12E-79  |
| INTS12       | -1.91906 | 3.39E-45  |
| LOC103236086 | -1.82813 | 1.95E-98  |
| SGMS2        | -1.43554 | 1.04E-119 |
| SEC24B       | -3.14943 | 0         |
| CFI          | -1.2838  | 7.00E-14  |
| PITX2        | -1.41438 | 1.22E-19  |
| ALPK1        | -1.12942 | 5.94E-21  |
| ZGRF1        | -1.13228 | 3.43E-09  |
| ARSJ         | -1.37822 | 3.63E-146 |
| UGT8         | -1.20719 | 2.58E-27  |
| TRAM1L1      | -3.77284 | 5.15E-12  |
| METTL14      | -1.79668 | 4.74E-75  |
| PDE5A        | -1.82333 | 6.14E-48  |
| C7H4orf3     | -1.01373 | 1.42E-115 |
| LOC103236197 | -3.91034 | 3.47E-04  |
| KIAA1109     | -1.36246 | 6.35E-158 |
| BBS12        | -4.05247 | 8.42E-63  |
| SPRY1        | -4.55943 | 6.44E-22  |
| ANKRD50      | -3.67923 | 2.22E-194 |
| FAT4         | -3.25826 | 1.60E-04  |
| PLK4         | -2.54683 | 2.00E-113 |
| PGRMC2       | -1.84811 | 0         |
| JADE1        | -3.18575 | 0         |
| PABPC4L      | -2.49044 | 8.60E-15  |
| NOCT         | -2.09078 | 9.39E-55  |
| ELF2         | -2.76266 | 2.69E-131 |
| RAB33B       | -2.30008 | 1.11E-21  |
| IL15         | -1.82014 | 1.86E-18  |
| USP38        | -2.40096 | 4.18E-123 |
| GAB1         | -1.69242 | 5.86E-45  |
| OTUD4        | -1.23865 | 2.86E-159 |
| ANAPC10      | -1.00047 | 3.45E-17  |
| SMAD1        | -2.26588 | 2.08E-63  |

|              |          |           |
|--------------|----------|-----------|
| MMAA         | -1.68795 | 3.10E-12  |
| ZNF827       | -2.01627 | 1.66E-295 |
| PRMT9        | -2.03387 | 1.31E-52  |
| LOC103236354 | -1.87114 | 1.18E-54  |
| NR3C2        | -1.15135 | 8.31E-05  |
| FHDC1        | -3.77284 | 1.39E-06  |
| LOC103236415 | -3.14943 | 8.03E-89  |
| HARBI1       | -3.2838  | 5.01E-15  |
| PDGFC        | -1.38182 | 4.74E-264 |
| GASK1B       | -3.2058  | 2.37E-04  |
| AMBRA1       | -1.33938 | 4.62E-61  |
| FNIP2        | -1.71336 | 1.54E-29  |
| RAPGEF2      | -1.68177 | 1.38E-98  |
| NPY1R        | -2.33843 | 1.68E-07  |
| MSMO1        | -1.28133 | 0         |
| TLL1         | -1.31045 | 3.76E-89  |
| CLCN3        | -1.01471 | 7.89E-135 |
| MFAP3L       | -1.17337 | 8.01E-12  |
| DUSP8        | -3.17337 | 3.36E-32  |
| TENM3        | -1.05674 | 4.04E-229 |
| CDKN2AIP     | -2.52701 | 2.77E-48  |
| IRF2         | -1.21564 | 7.65E-50  |
| ANKRD37      | -2.04917 | 1.02E-32  |
| LRP2BP       | -1.07172 | 2.89E-10  |
| CCDC110      | -1.20894 | 4.88E-05  |
| TLR3         | -1.66988 | 5.06E-78  |
| FAT1         | -1.30698 | 0         |
| LOC103236665 | 1.113742 | 2.94E-232 |
| CRY2         | -1.13849 | 5.98E-32  |
| CEBPD        | -5.49114 | 0         |
| SNAI2        | -6.5098  | 2.80E-125 |
| IFITM10      | -1.01651 | 6.26E-05  |
| RB1CC1       | -1.61925 | 1.02E-48  |
| LOC103236809 | -1.25826 | 2.04E-04  |
| RP1          | -1.15786 | 1.20E-04  |
| TGS1         | -1.72602 | 3.98E-185 |
| PLAG1        | -2.38538 | 2.87E-102 |
| FAM110B      | -2.48433 | 3.36E-13  |
| RAB2A        | -1.78862 | 9.49E-300 |
| CHD7         | -1.2998  | 3.62E-123 |
| YTHDF3       | -1.39706 | 1.12E-132 |
| ADHFE1       | -1.12647 | 4.00E-08  |
| RRS1         | -2.01741 | 1.17E-50  |
| VCP1P1       | -4.1416  | 1.52E-148 |

|              |          |           |
|--------------|----------|-----------|
| CSPP1        | -1.01491 | 7.76E-17  |
| ARFGEF1      | -2.33944 | 0         |
| MSC          | -3.24099 | 3.73E-11  |
| RDH10        | -1.57465 | 1.48E-208 |
| ZFHX4        | -2.95473 | 4.94E-41  |
| ZC2HC1A      | -1.01958 | 1.75E-30  |
| IL7          | -1.39432 | 5.64E-39  |
| ZBTB10       | -3.44589 | 1.85E-145 |
| PAG1         | -2.3578  | 1.92E-42  |
| SNX16        | -1.45091 | 5.37E-18  |
| TMEM64       | -1.02316 | 1.18E-160 |
| NECAB1       | -3.90094 | 2.34E-43  |
| C8H8orf88    | -1.02849 | 2.10E-16  |
| RUNX1T1      | -2.29655 | 2.25E-204 |
| RBM12B       | -3.42643 | 1.10E-154 |
| PDP1         | -1.94567 | 8.77E-85  |
| GEM          | -1.21287 | 5.23E-53  |
| VIRMA        | -1.68762 | 0         |
| TP53INP1     | -3.56756 | 1.48E-265 |
| PLEKHF2      | -3.60795 | 2.21E-117 |
| TSPYL5       | 5.134054 | 7.11E-04  |
| OSR2         | -3.13741 | 3.36E-13  |
| FBXO43       | -2.13896 | 4.47E-10  |
| RNF19A       | -2.01432 | 4.19E-137 |
| ZNF706       | -1.33008 | 5.06E-181 |
| RRM2B        | -1.04723 | 2.10E-79  |
| KLF10        | -3.86916 | 0         |
| SLC25A32     | -1.37398 | 1.78E-21  |
| TMEM74       | -2.42053 | 1.55E-34  |
| KCNV1        | -2.53837 | 3.82E-17  |
| LRRC4C       | -1.77284 | 4.01E-04  |
| TRPS1        | -1.93984 | 7.92E-134 |
| UTP23        | -1.24329 | 1.24E-41  |
| ENPP2        | -1.30889 | 5.96E-09  |
| DEPTOR       | -1.32953 | 1.25E-100 |
| COL14A1      | -1.23227 | 5.55E-05  |
| ZHX2         | -2.03869 | 7.57E-66  |
| LOC103237375 | -2.60038 | 2.62E-06  |
| ZHX1         | -2.10268 | 4.41E-151 |
| FBXO32       | -2.9481  | 0         |
| RNF139       | -3.07149 | 7.07E-281 |
| TRMT12       | -2.24232 | 2.39E-30  |
| SQLE         | -2.91044 | 0         |
| ZNF572       | -3.60066 | 3.33E-38  |

|              |          |           |
|--------------|----------|-----------|
| TRIB1        | -5.50132 | 0         |
| LRATD2       | -4.09717 | 2.01E-86  |
| LOC103237427 | -1.39221 | 1.86E-11  |
| MYC          | -3.09949 | 0         |
| LRRC6        | -1.30596 | 7.46E-06  |
| SLA          | -2.62083 | 1.19E-04  |
| TG           | -1.07103 | 9.23E-44  |
| NDRG1        | -1.07031 | 0         |
| CHRAC1       | -2.30323 | 3.05E-107 |
| PSCA         | -3.30889 | 1.08E-04  |
| JRK          | -1.7856  | 1.62E-28  |
| TRAF6        | -3.00301 | 8.41E-98  |
| RHPN1        | 1.044523 | 2.21E-20  |
| MAFA         | -4.15135 | 6.93E-05  |
| TIGD5        | -1.86119 | 6.23E-27  |
| PYCR3        | 1.375528 | 2.76E-170 |
| ZNF623       | -1.8478  | 6.24E-51  |
| ZNF707       | -2.63082 | 2.36E-15  |
| FAM83H       | -2.8394  | 5.83E-41  |
| NRBP2        | 1.437784 | 1.79E-100 |
| SCRIB        | 1.016178 | 5.02E-159 |
| BOP1         | 1.159663 | 2.37E-176 |
| FBXL6        | 1.106437 | 1.77E-35  |
| ADCK5        | 1.103839 | 2.30E-68  |
| TONSL        | 1.218258 | 2.24E-139 |
| RECQL4       | 1.143879 | 6.45E-61  |
| MFS3         | 1.246195 | 1.86E-37  |
| KIFC2        | 1.248077 | 4.09E-50  |
| FJX1         | -3.97741 | 0         |
| ZNF34        | -2.1     | 8.16E-22  |
| ZNF7         | -1.15504 | 6.55E-38  |
| COMMD5       | -1.49412 | 1.27E-29  |
| ZNF250       | -2.06404 | 2.94E-23  |
| LOC103237660 | -2.2612  | 2.51E-41  |
| ATAD2        | -1.01851 | 9.52E-134 |
| WDR37        | -1.0913  | 8.06E-37  |
| IDI1         | -1.59324 | 0         |
| KLF6         | -4.47689 | 0         |
| NET1         | -2.26469 | 2.75E-240 |
| TASOR2       | -1.25525 | 1.94E-69  |
| IL15RA       | 1.408229 | 5.91E-11  |
| KIN          | -2.15606 | 2.03E-48  |
| USP6NL       | -1.68931 | 5.90E-127 |
| PROSER2      | -2.29418 | 5.01E-62  |

|              |          |           |
|--------------|----------|-----------|
| MCM10        | 1.146259 | 2.52E-92  |
| RPP38        | -2.39108 | 8.39E-55  |
| NMT2         | -1.28773 | 9.26E-73  |
| FAM171A1     | -1.01811 | 1.14E-93  |
| SKIDA1       | -1.9319  | 1.46E-09  |
| LOC103237988 | -1.3328  | 2.97E-67  |
| SPAG6        | -1.47644 | 9.61E-04  |
| PIP4K2A      | -1.17226 | 5.40E-109 |
| MSRB2        | -1.12588 | 7.13E-46  |
| OTUD1        | -6.34573 | 7.71E-20  |
| KIAA1217     | -1.45369 | 7.90E-94  |
| ARHGAP21     | -1.4897  | 5.35E-132 |
| THNSL1       | -2.25323 | 9.94E-48  |
| WAC          | -1.00074 | 2.07E-197 |
| DEPDC7       | -1.2394  | 1.55E-14  |
| BAMBI        | -4.69503 | 1.33E-58  |
| JCAD         | -1.36625 | 3.35E-81  |
| MTPAP        | -2.88387 | 6.76E-163 |
| ARHGAP12     | -2.47964 | 2.32E-130 |
| EPC1         | -3.72237 | 1.01E-124 |
| NRP1         | -1.65183 | 1.58E-241 |
| CUL2         | -1.11563 | 8.03E-58  |
| FZD8         | -2.2058  | 1.25E-07  |
| LARP4B       | -1.84881 | 2.75E-115 |
| LRRK2        | -1.24947 | 5.64E-36  |
| PRICKLE1     | -4.49782 | 8.41E-257 |
| ARID2        | -2.13674 | 1.88E-83  |
| SLC38A2      | -4.98877 | 0         |
| AMIGO2       | -2.59972 | 1.08E-55  |
| VDR          | -1.2199  | 4.93E-24  |
| ASB8         | -1.43351 | 1.74E-26  |
| KANSL2       | -1.395   | 3.88E-104 |
| CCNT1        | -2.98348 | 3.10E-303 |
| KMT2D        | -1.13501 | 1.04E-92  |
| TROAP        | -1.62083 | 4.51E-37  |
| BCDIN3D      | -1.18903 | 1.46E-28  |
| PAX6         | -2.48123 | 0         |
| METTL7A      | -1.06708 | 9.08E-17  |
| FIGNL2       | -2.59387 | 2.86E-06  |
| ACVR1B       | -2.79668 | 2.80E-159 |
| LOC103238332 | -3.87717 | 4.21E-07  |
| NR4A1        | -1.69037 | 6.44E-06  |
| LOC103238343 | 1.451944 | 1.84E-73  |
| LOC103238345 | 1.080939 | 2.33E-28  |

|             |          |           |
|-------------|----------|-----------|
| KRT5        | 1.026933 | 2.45E-05  |
| KRT6A       | 1.633449 | 3.71E-27  |
| KRT76       | 1.666928 | 2.29E-09  |
| EIF4B       | -1.05124 | 0         |
| ZNF740      | -2.04895 | 4.12E-105 |
| MFSD5       | -2.22043 | 2.58E-76  |
| ARL14EP     | -1.07354 | 8.14E-23  |
| SP1         | -1.64285 | 5.80E-188 |
| HOXC13      | -2.12898 | 6.13E-11  |
| HOXC10      | -1.15135 | 4.11E-25  |
| HOXC6       | -1.51952 | 7.33E-23  |
| HOXC9       | -1.35591 | 1.33E-16  |
| DNAJC14     | -2.64592 | 2.80E-103 |
| PYM1        | -1.88903 | 8.51E-45  |
| RAB5B       | -1.02188 | 3.16E-177 |
| SUOX        | -2.34509 | 2.02E-49  |
| IKZF4       | -4.19507 | 9.03E-40  |
| NABP2       | 1.130562 | 4.97E-75  |
| BAZ2A       | -1.23685 | 1.98E-208 |
| BDNF        | -3.47328 | 1.04E-17  |
| ZBTB39      | -3.73631 | 6.00E-43  |
| NAB2        | -2.23663 | 1.50E-54  |
| LGR4        | -3.17484 | 3.94E-255 |
| INHBE       | -2.517   | 2.06E-07  |
| DDIT3       | -1.89359 | 8.80E-46  |
| 9-Mar       | -1.65216 | 2.42E-41  |
| LRIG3       | -1.61637 | 5.99E-35  |
| C11H12orf66 | -2.06351 | 4.21E-51  |
| SRGAP1      | -1.12922 | 2.50E-37  |
| TBK1        | -2.82807 | 1.48E-90  |
| RASSF3      | -1.26404 | 2.51E-46  |
| LEMD3       | -3.90529 | 4.08E-158 |
| HELB        | -2.42053 | 1.49E-09  |
| DYRK2       | -2.4173  | 1.01E-53  |
| MDM2        | -2.27776 | 6.76E-173 |
| YEATS4      | -1.09476 | 1.21E-30  |
| FRS2        | -2.28598 | 8.74E-97  |
| CNOT2       | -1.39567 | 8.84E-182 |
| LGR5        | -1.11225 | 8.58E-71  |
| THAP2       | -2.24264 | 4.17E-18  |
| ZFC3H1      | -1.44943 | 1.62E-132 |
| ATXN7L3B    | -3.33804 | 0         |
| PHLDA1      | -3.279   | 0         |
| BBS10       | -2.32823 | 7.68E-30  |



|              |          |           |
|--------------|----------|-----------|
| ZDHHHC17     | -1.79174 | 7.89E-57  |
| E2F7         | -2.15873 | 5.14E-122 |
| PPP1R12A     | -1.39531 | 9.60E-200 |
| ALX1         | -2.54777 | 1.04E-15  |
| DUSP6        | -4.60485 | 0         |
| BTG1         | -4.91555 | 0         |
| NUDT4        | -2.34283 | 2.51E-303 |
| TMCC3        | -1.77884 | 1.20E-15  |
| USP44        | -1.68496 | 4.58E-47  |
| NTN4         | -1.53104 | 9.83E-96  |
| CFAP54       | -1.27291 | 8.93E-05  |
| NAV2         | -1.12898 | 1.49E-46  |
| APAF1        | -2.61306 | 8.82E-55  |
| UHRF1BP1L    | -1.62016 | 1.14E-113 |
| GAS2L3       | -1.02289 | 1.91E-15  |
| GNPTAB       | -1.58346 | 3.62E-57  |
| E2F8         | -3.4051  | 3.04E-109 |
| ZDHHHC13     | -1.13987 | 8.22E-34  |
| NUAK1        | -1.36491 | 3.18E-137 |
| TCP11L2      | -2.10753 | 3.06E-18  |
| MTERF2       | -1.1088  | 1.52E-09  |
| FICD         | -1.3578  | 5.86E-17  |
| SSH1         | -1.15007 | 1.89E-88  |
| USP30        | -1.66787 | 4.80E-59  |
| ALKBH2       | -1.04629 | 1.26E-08  |
| UNG          | 1.006487 | 1.06E-62  |
| KCTD10       | -1.04099 | 2.19E-53  |
| LOC103239100 | -2.21837 | 1.27E-14  |
| SPTY2D1      | -2.52208 | 1.86E-163 |
| SH2B3        | -1.06289 | 5.31E-41  |
| ATXN2        | -1.42283 | 3.66E-78  |
| B4GALNT4     | 1.359663 | 3.66E-107 |
| NAA25        | -1.36873 | 3.01E-117 |
| TBX3         | -3.5287  | 2.33E-96  |
| MED13L       | -1.09446 | 3.52E-173 |
| LOC103239208 | -2.00331 | 1.66E-04  |
| FBXO21       | -1.15625 | 2.22E-47  |
| BICDL1       | -1.49983 | 2.83E-221 |
| SIRT4        | -1.45091 | 8.09E-06  |
| TRIAP1       | -1.34772 | 1.27E-80  |
| HNF1A        | -1.68357 | 9.74E-04  |
| KDM2B        | -1.81255 | 2.15E-55  |
| TMEM120B     | 1.070629 | 7.22E-23  |
| SETD1B       | -2.67554 | 8.24E-44  |

|              |          |           |
|--------------|----------|-----------|
| BCL7A        | -1.55327 | 1.24E-15  |
| RSRC2        | -2.16229 | 2.34E-103 |
| VPS37B       | -1.70389 | 1.11E-105 |
| C11H12orf65  | -1.70484 | 6.92E-24  |
| SNRNP35      | -2.21644 | 2.39E-28  |
| DNAH10       | -1.06389 | 5.40E-04  |
| UBC          | -1.43289 | 0         |
| DDX51        | 1.056859 | 9.18E-35  |
| GALNT9       | -2.09476 | 7.00E-05  |
| LOC103239448 | 1.549091 | 1.38E-12  |
| PGAM5        | 1.034518 | 6.36E-111 |
| ZNF605       | -1.21498 | 2.78E-21  |
| ZNF84        | -1.92844 | 5.52E-28  |
| ZNF10        | -1.27688 | 8.40E-10  |
| MUC19        | -3.03587 | 7.64E-04  |
| LOC103239500 | 1.084773 | 1.96E-65  |
| ZCCHC8       | -3.00208 | 1.44E-118 |
| SBNO1        | -1.32266 | 1.77E-76  |
| ZMYND19      | -1.31598 | 7.13E-19  |
| NELFB        | 1.023735 | 1.89E-153 |
| TOR4A        | -1.50536 | 2.83E-06  |
| TPRN         | -1.52772 | 1.09E-33  |
| C12H9orf139  | 2.622931 | 1.53E-06  |
| PAXX         | 1.134054 | 2.24E-15  |
| C8G          | 2.385593 | 1.40E-07  |
| AJM1         | -1.2262  | 3.27E-04  |
| LCN15        | -3.3578  | 7.31E-05  |
| NOTCH1       | -2.21179 | 8.19E-193 |
| SOX6         | -1.44768 | 1.05E-60  |
| C12H9orf116  | -1.27647 | 1.30E-24  |
| PPP1R26      | -1.37983 | 9.43E-128 |
| SURF2        | 1.012063 | 2.31E-31  |
| RALGDS       | -2.51592 | 5.07E-125 |
| TSC1         | -1.19156 | 6.58E-70  |
| GTF3C4       | -2.8521  | 7.02E-122 |
| TTF1         | -1.83105 | 3.58E-78  |
| SETX         | -1.77907 | 1.83E-153 |
| NTNG2        | -1.19413 | 1.75E-16  |
| ABL1         | -1.09025 | 5.13E-192 |
| PRDM12       | -4.43959 | 4.75E-20  |
| PTGES        | -2.45091 | 5.06E-04  |
| IER5L        | -6.41862 | 4.45E-118 |
| DOLK         | -2.1034  | 8.90E-39  |
| LRRC8A       | -1.48775 | 2.95E-23  |

|              |          |           |
|--------------|----------|-----------|
| CYP2R1       | -1.46275 | 2.54E-34  |
| GOLGA2       | -1.1032  | 8.38E-110 |
| PTGES2       | 1.44603  | 2.44E-202 |
| FAM102A      | -2.08951 | 2.90E-82  |
| ZNF79        | -1.33674 | 6.73E-08  |
| ZBTB34       | -4.4953  | 4.20E-06  |
| ZBTB43       | -3.22701 | 7.48E-34  |
| GAPVD1       | -1.02983 | 2.92E-69  |
| NR5A1        | 4.356446 | 3.72E-04  |
| ZBTB6        | -3.29683 | 3.11E-102 |
| ZBTB26       | -2.87237 | 3.03E-17  |
| PDCL         | -1.58607 | 5.42E-20  |
| SENP6        | -1.39114 | 1.31E-50  |
| PHIP         | -1.76958 | 1.94E-132 |
| TTK          | -1.15625 | 2.46E-24  |
| TENT5A       | -1.79195 | 2.09E-10  |
| TPBG         | -2.25245 | 2.31E-242 |
| RWDD2A       | -1.81031 | 3.51E-13  |
| PRSS35       | -1.62083 | 5.64E-04  |
| TBX18        | -1.33674 | 2.60E-21  |
| LOC103240069 | -1.98953 | 1.15E-24  |
| CNR1         | -1.81348 | 4.57E-10  |
| PNRC1        | -5.27285 | 0         |
| CASP8AP2     | -3.21246 | 1.18E-52  |
| EPHA7        | -2.12226 | 7.28E-305 |
| FUT9         | -1.16278 | 3.28E-07  |
| LOC103240143 | 1.680785 | 7.29E-04  |
| LATS1        | -1.87717 | 6.74E-29  |
| LOC103240189 | -2.97447 | 1.45E-21  |
| SASH1        | -1.76398 | 3.15E-25  |
| FBXO30       | -3.3951  | 9.12E-55  |
| HIVEP2       | -1.77568 | 6.92E-92  |
| CITED2       | -4.86495 | 0         |
| HECA         | -1.26095 | 5.70E-20  |
| TNFAIP3      | -1.61447 | 2.07E-95  |
| PDE7B        | -3.38637 | 3.12E-20  |
| SGK1         | -3.84323 | 2.58E-41  |
| SLC2A12      | -2.07852 | 5.70E-24  |
| ADM          | -7.4339  | 2.04E-38  |
| THEMIS       | 3.549091 | 1.05E-05  |
| RNF146       | -1.4769  | 3.41E-42  |
| RNF217       | -2.24651 | 1.03E-50  |
| WEE1         | -3.97447 | 1.83E-116 |
| TBC1D32      | -1.2328  | 6.25E-13  |

|              |          |           |
|--------------|----------|-----------|
| ASF1A        | -1.27194 | 7.98E-13  |
| MCM9         | -2.46883 | 6.31E-38  |
| ZNF143       | -1.13005 | 1.29E-25  |
| CEP85L       | -1.0238  | 2.52E-07  |
| RSPH4A       | -1.80141 | 2.97E-04  |
| TSPYL1       | -2.33005 | 5.09E-158 |
| TSPYL4       | -1.42421 | 3.22E-52  |
| FRK          | -1.05425 | 3.62E-16  |
| MARCKS       | -2.41223 | 6.37E-225 |
| TSSC4        | -1.50257 | 6.32E-20  |
| MFSD4B       | -1.56569 | 9.03E-36  |
| REV3L        | -2.29184 | 2.38E-109 |
| TRAF3IP2     | -1.2372  | 7.53E-18  |
| CDK19        | -1.25031 | 9.64E-72  |
| CDC40        | -1.28986 | 1.89E-54  |
| ZBTB24       | -3.52416 | 4.97E-40  |
| SESN1        | -3.40299 | 6.16E-86  |
| FOXO3        | -2.41877 | 1.87E-193 |
| SOBP         | -1.56393 | 4.70E-79  |
| C13H6orf203  | -1.59505 | 1.80E-32  |
| CD24         | -3.65907 | 0         |
| CRYBG1       | -1.2955  | 1.00E-140 |
| PRDM1        | -3.15135 | 3.51E-04  |
| LIN28B       | -1.34903 | 1.99E-04  |
| UFL1         | -1.0304  | 1.67E-69  |
| ZBTB2        | -2.70357 | 8.58E-32  |
| SYNE1        | -2.20085 | 1.32E-265 |
| FBXO5        | -3.35965 | 2.43E-97  |
| RGS17        | -1.18787 | 2.06E-08  |
| SCAF8        | -2.65385 | 2.76E-196 |
| ARID1B       | -1.12818 | 2.83E-66  |
| SYNJ2        | -1.02207 | 3.58E-65  |
| TULP4        | -1.93565 | 6.92E-86  |
| RSPH3        | -1.50338 | 9.30E-12  |
| LMO1         | -1.13541 | 7.01E-04  |
| WTAP         | -1.61314 | 1.75E-205 |
| UNC93A       | -1.63533 | 1.67E-06  |
| C13H6orf120  | -1.27969 | 1.14E-28  |
| FAM120B      | -1.60404 | 2.78E-89  |
| DLL1         | -3.23227 | 9.09E-08  |
| LOC103240987 | -3.33355 | 1.93E-08  |
| TBP          | -1.03891 | 9.32E-14  |
| LOC103241052 | -3.4953  | 2.24E-05  |
| ZNF2         | -4.16973 | 6.70E-24  |

|              |          |           |
|--------------|----------|-----------|
| ZNF514       | -1.97447 | 2.55E-04  |
| ITPRIPL1     | -1.1654  | 1.08E-12  |
| NEURL3       | -1.77284 | 9.41E-08  |
| ANKRD23      | -1.6639  | 9.50E-07  |
| SEMA4C       | -2.31545 | 4.64E-66  |
| CNGA3        | -1.52948 | 1.67E-28  |
| UNC50        | -1.32585 | 4.18E-41  |
| LIPT1        | -1.82595 | 2.46E-06  |
| REV1         | -2.02649 | 1.67E-77  |
| CNOT11       | -1.01434 | 6.52E-35  |
| TGFBRAP1     | -1.04792 | 2.27E-49  |
| C14H2orf49   | -1.56597 | 4.64E-59  |
| ST6GAL2      | 3.015501 | 7.42E-04  |
| RANBP2       | -2.17436 | 0         |
| SOWAHC       | -2.72037 | 1.80E-28  |
| BCL2L11      | -3.84323 | 5.20E-04  |
| ZC3H6        | -1.10965 | 3.10E-31  |
| CDKN1C       | -1.50329 | 6.74E-29  |
| CKAP2L       | -2.17347 | 2.35E-246 |
| LOC103241298 | -2.05696 | 8.63E-04  |
| RRP8         | -1.52726 | 1.48E-10  |
| RPIA         | 1.088165 | 4.10E-23  |
| EIF2AK3      | -2.45011 | 2.60E-163 |
| PPM1L        | -1.06123 | 4.75E-09  |
| TRIM59       | -1.62799 | 3.42E-33  |
| SMC4         | -1.13151 | 0         |
| LOC103241405 | -1.06277 | 2.55E-32  |
| SHOX2        | -1.38808 | 2.75E-15  |
| CCNL1        | -1.85262 | 3.05E-103 |
| TIPARP       | -3.22068 | 0         |
| C15H3orf33   | 1.472412 | 4.52E-42  |
| PLCH1        | -1.55851 | 2.02E-49  |
| DHX36        | -1.03648 | 3.15E-63  |
| ARHGEF26     | -1.39844 | 4.87E-08  |
| RAP2B        | -3.18725 | 4.05E-92  |
| P2RY1        | -5.82595 | 2.05E-27  |
| MED12L       | 1.13393  | 2.39E-06  |
| SIAH2        | -1.65207 | 6.36E-34  |
| TSC22D2      | -3.91782 | 1.00E-214 |
| TM4SF1       | -1.01222 | 0         |
| PLSCR4       | -1.59387 | 2.33E-09  |
| DIPK2A       | -1.37106 | 1.89E-41  |
| TRPC1        | -1.23113 | 5.98E-45  |
| XRN1         | -1.02154 | 4.56E-55  |

|              |          |           |
|--------------|----------|-----------|
| RASA2        | -1.0294  | 2.43E-24  |
| ZBTB38       | -2.3988  | 0         |
| PXYLP1       | -1.92271 | 3.73E-71  |
| DBR1         | -1.4794  | 2.14E-36  |
| NCK1         | -2.0651  | 4.24E-52  |
| MSL2         | -3.9119  | 1.14E-128 |
| AMOTL2       | -3.73603 | 0         |
| SLCO2A1      | -1.43797 | 2.25E-35  |
| LOC103241658 | -1.02929 | 3.18E-137 |
| ASTE1        | -2.4236  | 3.56E-15  |
| PIK3R4       | -1.93136 | 2.80E-167 |
| PLCL2        | -1.99064 | 4.40E-23  |
| SATB1        | -2.0754  | 4.79E-69  |
| NR1D2        | -1.80846 | 7.34E-124 |
| THRB         | -1.11624 | 2.91E-13  |
| RARB         | -1.28963 | 6.30E-29  |
| OXSM         | -2.16107 | 4.18E-93  |
| EOMES        | -2.87717 | 8.84E-06  |
| TGFBR2       | -2.34299 | 2.53E-298 |
| LOC103241812 | -2.96187 | 8.88E-14  |
| ZNF860       | -1.65602 | 1.14E-05  |
| EIF4A2       | -1.10285 | 1.26E-216 |
| BCL6         | -3.8682  | 1.44E-176 |
| CLDN1        | -1.10469 | 5.00E-68  |
| GMNC         | -5.30889 | 2.59E-10  |
| MB21D2       | -2.14074 | 3.11E-63  |
| HES1         | -4.0106  | 1.88E-80  |
| AHNAK        | -1.43659 | 0         |
| FAM43A       | -2.14499 | 6.01E-29  |
| LOC103241951 | -1.5864  | 7.82E-04  |
| LOC103241983 | -1.63751 | 7.49E-43  |
| CEP19        | -1.07709 | 3.69E-09  |
| WDR53        | -2.37467 | 1.35E-23  |
| FBXO45       | -1.24857 | 5.44E-17  |
| RNF168       | -2.15135 | 3.28E-27  |
| UBXN7        | -1.61631 | 1.18E-67  |
| LOC103242077 | -2.04784 | 5.85E-10  |
| GEMIN4       | -2.08766 | 1.28E-53  |
| C16H17orf97  | -3.4953  | 3.00E-22  |
| SMYD4        | -1.11387 | 5.14E-13  |
| LOC103242100 | -1.83557 | 4.56E-07  |
| WDR81        | -1.0996  | 2.51E-29  |
| TLCD2        | -1.17527 | 4.45E-06  |
| SCARF1       | 4.270095 | 0         |

|              |          |           |
|--------------|----------|-----------|
| MNT          | -2.2289  | 3.75E-44  |
| HASPIN       | -3.33083 | 1.17E-33  |
| UBE2G1       | -1.82535 | 1.16E-132 |
| SMTNL2       | -2.10435 | 4.33E-80  |
| ZFP3         | -2.41174 | 4.40E-30  |
| ZNF594       | -3.54261 | 4.61E-45  |
| MIS12        | -2.20245 | 2.55E-35  |
| WSCD1        | 1.441778 | 1.14E-34  |
| MED31        | -2.03814 | 7.03E-47  |
| SLC16A13     | -1.89148 | 1.01E-40  |
| PHF23        | -2.95782 | 1.05E-180 |
| KCTD11       | -3.58724 | 7.92E-161 |
| TMEM102      | -1.98229 | 7.79E-27  |
| ZBTB4        | -1.16006 | 8.73E-72  |
| SOX15        | -3.77284 | 7.79E-04  |
| KDM6B        | -2.6896  | 3.08E-63  |
| ALOXE3       | 1.382442 | 4.62E-19  |
| PER1         | -2.3578  | 3.70E-41  |
| BORCS6       | -3.96479 | 8.82E-84  |
| KRBA2        | -2.62083 | 3.43E-08  |
| SOX18        | -3.7177  | 1.68E-11  |
| ADPRM        | -1.39733 | 5.23E-09  |
| MAP2K4       | -1.30652 | 2.48E-24  |
| HS3ST3A1     | -1.53728 | 3.52E-62  |
| HS3ST3B1     | -2.09174 | 4.93E-128 |
| LOC103242438 | -2.87717 | 8.84E-06  |
| CENPV        | 1.157002 | 5.49E-84  |
| MED9         | -1.60066 | 2.07E-41  |
| RAI1         | -2.14592 | 1.92E-82  |
| ALKBH5       | -1.29694 | 2.05E-100 |
| GID4         | -1.85092 | 1.28E-119 |
| MIEF2        | -2.04193 | 7.35E-87  |
| SMCR8        | -2.49729 | 6.62E-68  |
| FAM83G       | -2.11116 | 8.44E-28  |
| MAPK7        | -2.56985 | 3.37E-80  |
| AKAP10       | -2.16515 | 2.58E-74  |
| USP22        | -1.35824 | 5.17E-199 |
| NATD1        | -1.73731 | 4.00E-22  |
| NCBP3        | -1.01517 | 8.46E-19  |
| PIMREG       | 1.922135 | 1.35E-16  |
| ARFRP1       | 1.020824 | 5.13E-53  |
| GMEB2        | -1.0374  | 4.99E-26  |
| TMEM97       | -1.46348 | 1.23E-37  |
| TNFAIP1      | -1.04478 | 2.20E-44  |

|         |          |           |
|---------|----------|-----------|
| SDF2    | -1.14846 | 2.50E-78  |
| FAM222B | -3.09115 | 1.79E-92  |
| PHF12   | -2.14542 | 6.55E-224 |
| NUFIP2  | -2.01651 | 0         |
| CORO6   | 1.268282 | 9.83E-40  |
| SSH2    | -2.17644 | 6.09E-60  |
| GOSR1   | -1.14524 | 1.07E-55  |
| TEFM    | -1.90437 | 7.70E-33  |
| ATAD5   | -1.36393 | 5.85E-30  |
| CDK5R1  | -2.57331 | 4.26E-21  |
| ZNF830  | -4.99449 | 5.28E-102 |
| SLFN5   | -4.62083 | 6.20E-23  |
| SLFN12  | -2.3578  | 5.94E-09  |
| PEX12   | -2.51962 | 5.69E-65  |
| CCL5    | 7.178351 | 3.03E-66  |
| HEATR6  | -1.22364 | 5.66E-114 |
| HNF1B   | -3.34345 | 0         |
| SYNRG   | -1.43672 | 8.75E-99  |
| ACACA   | -1.03507 | 0         |
| LHX1    | -4.23586 | 0         |
| GGNBP2  | -1.78733 | 1.48E-193 |
| USP32   | -1.10795 | 4.45E-136 |
| APPBP2  | -1.31607 | 0         |
| PPM1D   | -3.12231 | 0         |
| INTS2   | -1.53801 | 3.07E-97  |
| MED13   | -2.11638 | 0         |
| RPS6KB1 | -1.34789 | 7.32E-111 |
| PTRH2   | -2.41462 | 1.43E-108 |
| VMP1    | -1.12238 | 0         |
| YPEL2   | -3.5098  | 1.76E-90  |
| SMG8    | -3.86485 | 3.51E-240 |
| MTMR4   | -1.4641  | 1.10E-263 |
| RNF43   | -1.28963 | 1.27E-04  |
| SRSF1   | -1.03825 | 8.49E-193 |
| VEZF1   | -2.60428 | 0         |
| YTHDF1  | -3.40299 | 1.29E-170 |
| COIL    | -2.09133 | 2.86E-156 |
| MBTD1   | -1.05918 | 2.64E-45  |
| TOB1    | -4.88509 | 2.12E-213 |
| LUC7L3  | -1.28539 | 1.28E-215 |
| XYLT2   | -1.30889 | 4.05E-75  |
| DIDO1   | -2.11465 | 1.11E-187 |
| SGCA    | -1.08478 | 2.78E-06  |
| ITGA3   | 1.098764 | 0         |



|              |          |           |
|--------------|----------|-----------|
| DLX4         | -1.02953 | 4.28E-07  |
| TNRC6C       | -1.69414 | 5.10E-44  |
| JMJD6        | -1.63248 | 5.85E-79  |
| SPHK1        | 1.35333  | 3.96E-35  |
| QRICH2       | 2.286057 | 8.45E-05  |
| FOXJ1        | -1.2798  | 3.72E-06  |
| TRIM47       | -1.52714 | 1.79E-53  |
| SLC25A19     | 1.481977 | 5.01E-21  |
| USH1G        | -1.41027 | 3.88E-04  |
| NAT9         | 1.125045 | 9.78E-40  |
| LOC103243079 | -2.25826 | 1.38E-04  |
| GPRC5C       | -1.87257 | 1.65E-271 |
| SSTR2        | 4.402112 | 1.78E-63  |
| FAM104A      | -1.31026 | 4.52E-60  |
| CDC42EP4     | -2.63082 | 1.57E-43  |
| MAP2K6       | -1.91034 | 2.90E-06  |
| SLC16A6      | -1.4051  | 4.07E-09  |
| BPTF         | -1.71928 | 4.77E-260 |
| HELZ         | -1.32301 | 1.78E-95  |
| AXIN2        | -1.17337 | 2.49E-04  |
| GNA13        | -2.76927 | 0         |
| TANC2        | -1.05123 | 5.85E-76  |
| TLK2         | -1.59676 | 4.80E-129 |
| WNT9B        | -2.66036 | 1.66E-08  |
| KANSL1       | -3.02582 | 0         |
| PLEKHM1      | -1.15902 | 1.01E-42  |
| MAP3K14      | -1.64845 | 1.55E-193 |
| HEXIM2       | -1.74159 | 3.82E-17  |
| HEXIM1       | -2.3258  | 0         |
| KIF18B       | -1.38215 | 6.45E-31  |
| GFAP         | -1.17358 | 0         |
| PPP1R3D      | -4.27746 | 3.18E-34  |
| LOC103243306 | -2.70725 | 1.66E-18  |
| CCDC103      | -1.62083 | 2.14E-15  |
| FAM217B      | -2.69005 | 4.00E-50  |
| GJC1         | -1.77284 | 4.34E-57  |
| FZD2         | -3.73762 | 0         |
| ITGA2B       | 1.848652 | 4.25E-04  |
| C16H17orf53  | -1.56768 | 1.79E-38  |
| ETV4         | 1.733195 | 3.93E-70  |
| ARL4D        | -4.15135 | 1.18E-08  |
| PSME3        | 1.141686 | 0         |
| PLEKHH3      | -1.52215 | 2.58E-33  |
| RETREG3      | -2.45818 | 3.74E-198 |

|              |          |           |
|--------------|----------|-----------|
| PSMC3IP      | 1.562086 | 1.44E-91  |
| KAT2A        | 1.258326 | 5.43E-252 |
| KLHL11       | -1.48333 | 2.55E-05  |
| KRT14        | 1.790595 | 3.89E-17  |
| KRT16        | 1.27575  | 2.65E-07  |
| KRT19        | -1.17705 | 4.56E-24  |
| KRT13        | 1.348044 | 1.01E-13  |
| LOC103243474 | 1.863261 | 9.78E-11  |
| LOC103243485 | -5.06562 | 8.03E-09  |
| KRT28        | 1.610492 | 8.20E-05  |
| RARA         | -1.60741 | 1.21E-67  |
| MSL1         | -1.06225 | 1.42E-91  |
| NR1D1        | -2.01908 | 1.75E-31  |
| GRB7         | -2.3887  | 2.20E-157 |
| CDK12        | -1.25981 | 6.31E-168 |
| STAC2        | -1.31236 | 3.84E-25  |
| CWC25        | -1.96748 | 1.12E-71  |
| PCGF2        | -1.04654 | 9.90E-81  |
| EPOP         | -1.1241  | 2.23E-15  |
| ARHGAP23     | -1.22191 | 5.51E-115 |
| TBKBP1       | -1.28729 | 2.34E-66  |
| SP2          | -1.88149 | 2.09E-71  |
| HOXB6        | -1.12737 | 3.62E-28  |
| HOXB5        | -2.44047 | 3.72E-38  |
| HOXB4        | -1.21958 | 1.76E-07  |
| HOXB3        | -1.1434  | 2.21E-12  |
| HOXB7        | -1.40448 | 6.88E-26  |
| HOXB8        | -2.25444 | 6.36E-32  |
| IGF2BP1      | -1.71394 | 7.26E-04  |
| ZNF652       | -1.82014 | 1.25E-14  |
| RAB22A       | -1.07145 | 5.64E-40  |
| SOCS3        | -6.91034 | 2.25E-215 |
| CANT1        | -1.78421 | 0         |
| CBX2         | -1.23518 | 1.11E-07  |
| CBX8         | -3.8872  | 1.12E-60  |
| CBX4         | -4.01256 | 3.96E-173 |
| PMEPA1       | -1.5261  | 0         |
| PCK1         | -2.93817 | 2.24E-18  |
| BAHCC1       | -1.35248 | 5.68E-50  |
| FSCN2        | -2.02076 | 5.99E-08  |
| MRPL12       | 1.093514 | 1.14E-223 |
| PYCR1        | 1.128069 | 5.10E-197 |
| CENPX        | 1.514534 | 1.13E-115 |
| LRRC45       | 1.166409 | 8.21E-36  |

|              |          |           |
|--------------|----------|-----------|
| DUS1L        | 1.306766 | 2.17E-141 |
| TEX19        | -2.60471 | 8.58E-10  |
| BMP7         | 2.262001 | 8.58E-43  |
| METRNL       | -2.42819 | 2.28E-68  |
| TFAP2C       | -2.91034 | 6.84E-18  |
| TAOK1        | -2.04827 | 0         |
| LOC103243832 | -3.00119 | 9.53E-04  |
| SMURF2       | -1.01173 | 1.34E-35  |
| WIPF2        | -1.58533 | 5.39E-44  |
| MED1         | -1.09555 | 7.17E-133 |
| OXL1D1       | -2.02245 | 8.12E-09  |
| CASS4        | -2.65254 | 2.92E-10  |
| AURKA        | -1.3546  | 1.65E-118 |
| CSTF1        | -2.54442 | 9.59E-91  |
| OGFRL1       | -1.44099 | 2.48E-52  |
| MC3R         | -4.36977 | 5.01E-19  |
| PHF3         | -2.37068 | 1.22E-292 |
| PTP4A1       | -1.22797 | 0         |
| CYP24A1      | -1.58841 | 6.25E-08  |
| ZNF451       | -1.30744 | 1.35E-29  |
| KIAA1586     | -3.0055  | 5.71E-17  |
| LOC103243978 | -1.09476 | 3.26E-06  |
| DST          | -1.21886 | 0         |
| FAM83B       | -2.38951 | 3.45E-05  |
| PAR6D6G      | 1.307483 | 7.87E-31  |
| ADNP2        | -3.89753 | 4.92E-217 |
| PQLC1        | 1.061456 | 5.11E-31  |
| NFATC1       | -1.59834 | 3.53E-37  |
| ZNF217       | -4.24053 | 5.68E-305 |
| ZNF407       | -1.62083 | 5.21E-30  |
| TIMM21       | -2.61488 | 2.44E-141 |
| SOCS6        | -3.43823 | 1.09E-100 |
| DSEL         | -2.34953 | 7.37E-46  |
| BCL2         | -2.14752 | 0         |
| PHLPP1       | -1.65983 | 7.30E-111 |
| ZCCHC2       | -2.34538 | 5.76E-90  |
| RELCH        | -1.27248 | 9.68E-72  |
| ZFP64        | -1.68795 | 6.69E-27  |
| MALT1        | -2.62228 | 0         |
| ALPK2        | -1.77566 | 0         |
| NFATC2       | -1.80846 | 3.32E-06  |
| ONECUT2      | -1.8569  | 2.59E-11  |
| LOC103244249 | -1.06234 | 3.72E-04  |
| RGMB         | -2.97447 | 1.76E-16  |

|              |          |           |
|--------------|----------|-----------|
| CHD1         | -2.33656 | 8.86E-236 |
| MOCS3        | -2.24886 | 4.44E-26  |
| GIN1         | -2.46089 | 1.98E-27  |
| NUDT12       | -1.10589 | 9.33E-47  |
| EFNA5        | -1.0991  | 4.40E-18  |
| ADNP         | -3.09179 | 0         |
| STARD4       | -1.59004 | 1.60E-55  |
| EPB41L4A     | -1.41018 | 4.09E-80  |
| APC          | -2.42087 | 2.24E-127 |
| PAR6B        | -4.83288 | 5.49E-65  |
| LOC103244341 | -1.47476 | 9.11E-07  |
| FEM1C        | -5.05906 | 3.62E-137 |
| TICAM2       | -1.54488 | 5.96E-23  |
| SEMA6A       | -2.60357 | 0         |
| TNFAIP8      | -2.72435 | 2.66E-116 |
| LOX          | -1.27782 | 7.49E-83  |
| PTPN1        | -1.08522 | 3.10E-85  |
| ZNF608       | -4.05011 | 1.58E-144 |
| CEBPB        | -5.46822 | 0         |
| GRAMD2B      | -1.76931 | 1.66E-25  |
| PHAX         | -1.13216 | 1.10E-39  |
| MEGF10       | -1.0089  | 3.64E-05  |
| TMEM189      | -1.58019 | 1.21E-43  |
| PRRC1        | -1.33055 | 2.21E-99  |
| CDC42SE2     | -1.08968 | 7.32E-38  |
| FNIP1        | -2.05473 | 1.65E-101 |
| RAPGEF6      | -1.6639  | 4.58E-40  |
| IRF1         | -2.21807 | 1.41E-43  |
| SPATA2       | -2.50499 | 2.80E-56  |
| GDF9         | -1.42476 | 2.02E-60  |
| AFF4         | -1.5071  | 0         |
| ZCCHC10      | -1.22852 | 3.79E-16  |
| FSTL4        | -1.41174 | 7.59E-06  |
| CDKL3        | -1.14021 | 3.99E-05  |
| JADE2        | -1.48017 | 6.60E-47  |
| B4GALT5      | -1.65378 | 1.39E-139 |
| LOC103244555 | -1.60778 | 1.59E-69  |
| LOC103244556 | -1.83219 | 5.21E-66  |
| CAMLG        | -1.26328 | 1.96E-63  |
| PCBD2        | 1.192606 | 5.87E-14  |
| C23H5orf66   | -1.80846 | 9.70E-09  |
| SLC25A48     | 1.605675 | 4.17E-05  |
| HNRNPA0      | -1.1385  | 8.83E-97  |
| EGR1         | -4.51586 | 1.13E-190 |

|              |          |           |
|--------------|----------|-----------|
| KDM3B        | -1.0328  | 3.45E-111 |
| FAM53C       | -1.30111 | 1.76E-60  |
| BRD8         | -1.54278 | 8.31E-153 |
| FAM13B       | -1.47853 | 4.17E-34  |
| PREX1        | 1.050508 | 2.18E-40  |
| CXXC5        | -1.57233 | 6.24E-306 |
| IGIP         | -2.4868  | 1.67E-101 |
| PURA         | -1.12446 | 2.30E-20  |
| TAF7         | -1.86954 | 0         |
| LOC103244694 | -3.53837 | 1.50E-05  |
| NR3C1        | -2.14388 | 2.18E-148 |
| KCTD16       | -2.32538 | 6.94E-05  |
| ZMYND8       | -2.17566 | 4.04E-178 |
| RBM27        | -1.99909 | 4.89E-158 |
| JAKMIP2      | -1.11157 | 6.82E-38  |
| FBXO38       | -1.97142 | 2.75E-163 |
| ADRB2        | -4.0938  | 1.33E-213 |
| GRPEL2       | -1.24738 | 7.53E-06  |
| PCYOX1L      | -2.19148 | 9.31E-33  |
| PPARGC1B     | -3.96818 | 7.85E-288 |
| PDE6A        | 5.838926 | 1.07E-05  |
| SLC26A2      | -1.04964 | 2.56E-46  |
| TIGD6        | -4.38601 | 2.92E-19  |
| SYNPO        | -1.03688 | 6.70E-39  |
| RBM22        | -1.49805 | 4.79E-81  |
| DCTN4        | -1.00275 | 6.56E-67  |
| SLC36A2      | 2.964242 | 5.50E-15  |
| MFAP3        | -1.73142 | 5.08E-90  |
| SAP30L       | -1.11685 | 5.20E-30  |
| CNOT8        | -1.99752 | 2.95E-133 |
| HAVCR1       | -1.50136 | 0         |
| MED7         | -3.1532  | 3.56E-92  |
| TP53RK       | -2.44661 | 2.78E-31  |
| RNF145       | -2.98853 | 0         |
| PWWP2A       | -1.72271 | 1.83E-46  |
| CCNJL        | -1.13896 | 1.16E-13  |
| ZBED8        | -2.93741 | 1.42E-30  |
| ZNF334       | -2.26294 | 1.63E-26  |
| PANK3        | -1.39666 | 3.36E-69  |
| FOX1         | 5.134054 | 7.11E-04  |
| LOC103244958 | -1.86595 | 2.94E-05  |
| TLX3         | -1.77284 | 4.01E-04  |
| FGF18        | -2.64731 | 1.39E-06  |
| UBTD2        | -1.34799 | 1.11E-56  |

|              |          |           |
|--------------|----------|-----------|
| NEURL1B      | -1.52891 | 7.40E-27  |
| DUSP1        | -3.58146 | 3.69E-296 |
| CPEB4        | -1.36297 | 2.00E-80  |
| SLC35C2      | 1.200232 | 8.95E-119 |
| MSX2         | -5.91034 | 5.65E-29  |
| FAF2         | -1.02559 | 1.35E-141 |
| HK3          | 2.786131 | 3.20E-11  |
| UIMC1        | -1.35038 | 7.80E-44  |
| NSD1         | -1.14689 | 1.48E-245 |
| RAB24        | 1.060156 | 2.83E-57  |
| SLC34A1      | -2.33355 | 3.37E-06  |
| LOC103245076 | 1.093662 | 1.70E-31  |
| LOC103245077 | 1.159956 | 0         |
| CLK4         | -2.70854 | 5.12E-76  |
| NCOA5        | -3.00013 | 3.60E-165 |
| ZNF354A      | -1.71705 | 2.58E-44  |
| ZNF879       | -3.45091 | 1.95E-25  |
| MAML1        | -1.21479 | 1.02E-89  |
| LOC103245129 | -1.82014 | 5.40E-05  |
| ZFP62        | -1.9392  | 9.09E-76  |
| LOC103245175 | -3.2058  | 2.37E-04  |
| ZSWIM1       | -2.96014 | 3.11E-56  |
| ZFP2         | -1.27403 | 1.61E-04  |
| ABHD17C      | -1.45977 | 7.89E-104 |
| MORF4L1      | -1.27832 | 6.89E-244 |
| IREB2        | -2.90308 | 0         |
| ZSWIM3       | -2.96748 | 6.14E-24  |
| PEAK1        | -1.27369 | 2.91E-25  |
| ISL2         | -1.11387 | 1.14E-05  |
| SIN3A        | -2.67774 | 0         |
| IMP3         | -2.23518 | 3.91E-51  |
| SNX33        | -2.39342 | 5.96E-55  |
| C26H15orf39  | -2.79432 | 2.66E-22  |
| WFDC8        | 3.905547 | 3.57E-07  |
| SEMA7A       | -2.17779 | 0         |
| PML          | -2.13605 | 0         |
| MYO9A        | -1.96381 | 1.06E-143 |
| SENP8        | -1.57192 | 5.94E-10  |
| LARP6        | -1.54402 | 2.99E-26  |
| KIF23        | -1.34087 | 7.80E-95  |
| GLCE         | -1.25685 | 6.95E-74  |
| SPESP1       | -1.87445 | 9.90E-27  |
| CORO2B       | 1.08776  | 6.65E-30  |
| FEM1B        | -3.84393 | 1.02E-281 |

|             |          |           |
|-------------|----------|-----------|
| PIAS1       | -2.06646 | 2.70E-126 |
| C26H15orf61 | -2.34861 | 5.24E-28  |
| SMAD6       | -1.69037 | 1.08E-10  |
| MEGF11      | 1.286057 | 3.60E-13  |
| DENND4A     | -1.70461 | 8.30E-121 |
| SLC24A1     | -1.56053 | 1.62E-17  |
| IGDCC3      | -1.11016 | 4.76E-24  |
| CLPX        | -1.06294 | 2.43E-45  |
| RASL12      | -3.84323 | 6.26E-07  |
| PLEKHO2     | -2.97753 | 1.66E-105 |
| STK4        | -1.07502 | 1.81E-50  |
| RORA        | -1.19238 | 1.10E-04  |
| RIMS4       | 1.215668 | 3.73E-06  |
| BNIP2       | -1.33988 | 1.44E-48  |
| RNF111      | -1.66427 | 1.17E-116 |
| SLTM        | -1.01393 | 1.13E-83  |
| ADAM10      | -1.39076 | 0         |
| POLR2M      | -1.30596 | 1.47E-38  |
| CGNL1       | -1.65711 | 6.07E-97  |
| RFX7        | -1.6528  | 5.85E-183 |
| C26H15orf65 | -1.2394  | 8.49E-04  |
| FAM214A     | -1.12405 | 5.69E-24  |
| LEO1        | -1.83512 | 1.40E-67  |
| USP8        | -1.21955 | 3.78E-115 |
| GABPB1      | -1.18718 | 6.84E-24  |
| FGF7        | 2.034518 | 4.44E-04  |
| SECISBP2L   | -1.6573  | 1.02E-191 |
| CEP152      | -1.26926 | 1.39E-15  |
| OSER1       | -2.57339 | 1.08E-131 |
| BLOC1S6     | 3.784814 | 0         |
| MFAP1       | -1.96859 | 2.60E-160 |
| LCMT2       | -2.96748 | 6.14E-24  |
| ZSCAN29     | -2.18026 | 1.11E-89  |
| TTBK2       | -1.45898 | 1.53E-57  |
| FADD        | -1.84048 | 1.18E-17  |
| STARD9      | -1.18115 | 5.52E-29  |
| SPTBN5      | 1.26037  | 8.50E-19  |
| LTK         | 1.116776 | 2.05E-08  |
| MGA         | -2.04932 | 1.10E-156 |
| INO80       | -1.57727 | 8.22E-113 |
| CHAC1       | -3.73631 | 1.54E-32  |
| VPS18       | -1.89527 | 2.24E-100 |
| RAD51       | 1.067909 | 1.33E-32  |
| C26H15orf62 | -3.53837 | 5.74E-10  |

|              |          |           |
|--------------|----------|-----------|
| RPUSD2       | -3.53572 | 7.00E-71  |
| CCDC32       | -2.18643 | 2.39E-27  |
| BAHD1        | -1.42439 | 1.42E-52  |
| DISP2        | -1.27453 | 1.53E-17  |
| ANKRD63      | -3.91034 | 3.47E-04  |
| PAK6         | -1.3961  | 1.06E-19  |
| BMF          | -4.64454 | 0         |
| THBS1        | -1.36704 | 0         |
| SPRED1       | -1.28157 | 4.11E-53  |
| ZNF770       | -1.1647  | 6.07E-58  |
| PGBD4        | -4.4051  | 2.25E-10  |
| FMN1         | -2.24778 | 0         |
| GREM1        | -1.19355 | 0         |
| ARHGAP11A    | -1.3783  | 2.06E-189 |
| MTMR10       | -1.74973 | 1.96E-297 |
| NSMCE3       | -1.65212 | 5.89E-74  |
| TJP1         | -1.10429 | 1.32E-143 |
| MTG1         | 1.029931 | 9.91E-73  |
| TUBGCP5      | -1.63785 | 4.30E-51  |
| GABRA5       | -1.40236 | 2.27E-12  |
| LOC103246028 | -1.97969 | 1.33E-04  |
| KNL1         | -1.23438 | 4.58E-22  |
| FRYL         | -1.00943 | 2.03E-98  |
| FAM83D       | -4.03372 | 1.82E-95  |
| TEC          | -2.13541 | 8.47E-22  |
| NFXL1        | -1.18037 | 5.23E-24  |
| GABRA2       | -1.64457 | 0         |
| DCAF4L1      | -1.37902 | 7.50E-07  |
| RBM47        | -1.10621 | 8.73E-89  |
| TLR1         | -2.23122 | 1.34E-05  |
| KLF3         | -3.57866 | 0         |
| RELL1        | -2.13273 | 6.05E-13  |
| C27H4orf19   | 5.212436 | 1.30E-18  |
| PCDH7        | -1.05972 | 1.77E-04  |
| RBPJ         | -1.06214 | 3.01E-66  |
| ZCCHC4       | -1.24886 | 4.53E-12  |
| KIAA1755     | -1.24532 | 4.39E-05  |
| SLIT2        | -1.32872 | 1.84E-40  |
| DCAF16       | -1.84142 | 3.90E-51  |
| LCORL        | -1.31441 | 2.62E-16  |
| RPRD1B       | -1.0328  | 6.26E-38  |
| FBXL5        | -1.94742 | 1.04E-168 |
| CPEB2        | -2.32538 | 4.06E-16  |
| BLCAP        | -1.29418 | 5.85E-56  |



|              |          |           |
|--------------|----------|-----------|
| BOD1L1       | -1.51446 | 6.39E-119 |
| NKX3-2       | -1.25826 | 1.93E-05  |
| HS3ST1       | -4.20198 | 0         |
| ZNF518B      | -3.12847 | 2.41E-66  |
| ZBTB49       | -2.4953  | 1.94E-22  |
| MSX1         | -1.31271 | 1.90E-08  |
| STK32B       | 1.317766 | 9.99E-04  |
| C27H4orf50   | -1.97586 | 6.75E-37  |
| WFS1         | -1.15111 | 4.41E-282 |
| MRFAP1L1     | -3.06407 | 1.08E-106 |
| BLOC1S4      | -2.0651  | 4.24E-52  |
| KIAA0232     | -2.72703 | 5.17E-189 |
| TBC1D14      | -1.26765 | 4.48E-163 |
| TADA2B       | -2.64845 | 7.98E-84  |
| SH3TC1       | -1.01559 | 7.54E-41  |
| TRMT44       | -1.88514 | 1.32E-30  |
| RBL1         | -1.18787 | 9.37E-04  |
| MFSD10       | 1.057337 | 9.26E-53  |
| FAM193A      | -1.21598 | 1.98E-43  |
| MXD4         | -1.23707 | 5.57E-93  |
| HAUS3        | -2.78589 | 3.37E-24  |
| LOC103246471 | 1.223851 | 5.86E-10  |
| FAM53A       | 1.129792 | 3.56E-16  |
| CCND1        | 1.078373 | 3.88E-235 |
| JAG1         | -1.55887 | 4.80E-17  |
| IDUA         | 1.094768 | 3.62E-55  |
| ZNF721       | -1.00111 | 1.48E-20  |
| LOC103246525 | -1.92619 | 1.11E-25  |
| VKORC1L1     | -1.14512 | 2.05E-71  |
| KCTD7        | -1.69824 | 1.06E-68  |
| LOC103246604 | -4.2058  | 5.32E-09  |
| AUTS2        | -2.97582 | 2.32E-237 |
| CASTOR2      | -1.09789 | 1.52E-29  |
| LOC103246613 | -2.25826 | 3.70E-49  |
| CLDN4        | -1.42516 | 0         |
| STX1A        | 1.426194 | 5.99E-94  |
| DNAJC30      | -2.03219 | 6.60E-85  |
| VPS37D       | -2.93204 | 7.82E-16  |
| POM121C      | -1.21549 | 5.12E-134 |
| YWHAG        | -1.2376  | 0         |
| LOC103246669 | 2.785108 | 7.76E-09  |
| ALKBH4       | -2.71457 | 1.38E-47  |
| SH2B2        | -1.41723 | 4.33E-23  |
| TRIM56       | -1.36132 | 1.88E-67  |

|              |          |           |
|--------------|----------|-----------|
| UFSP1        | -2.46586 | 1.40E-27  |
| POP7         | -1.80803 | 6.45E-52  |
| BMP2         | -3.5262  | 1.76E-31  |
| TSC22D4      | -1.07408 | 1.18E-41  |
| MEPCE        | -1.95166 | 4.43E-224 |
| ZSCAN21      | -1.62785 | 1.50E-55  |
| ZNF3         | -3.5879  | 3.10E-147 |
| GJC3         | -1.74369 | 5.40E-04  |
| ZSCAN25      | -2.24207 | 4.81E-37  |
| CYP3A7       | 1.88771  | 8.90E-04  |
| ZKSCAN5      | -1.38406 | 1.88E-41  |
| FAM200A      | -2.63172 | 4.75E-40  |
| ZNF394       | -3.6432  | 5.62E-78  |
| TMEM130      | 1.068466 | 1.24E-04  |
| LMTK2        | -1.1828  | 8.43E-118 |
| USP42        | -3.52449 | 1.89E-186 |
| ZNF12        | -3.30291 | 8.14E-89  |
| FBXL18       | -1.39627 | 3.18E-13  |
| TNRC18       | -1.81816 | 2.44E-150 |
| RBAK         | -1.31155 | 7.96E-74  |
| FOXK1        | -1.79928 | 1.05E-124 |
| LFNG         | -1.44248 | 4.62E-99  |
| CHST12       | -1.17588 | 1.24E-34  |
| MRM2         | -1.23465 | 7.81E-33  |
| TMEM184A     | -1.59775 | 2.45E-04  |
| GPR146       | -2.0089  | 1.12E-08  |
| ADAP1        | 1.288856 | 5.79E-20  |
| GTF2IRD1     | -1.48728 | 2.07E-125 |
| TMEM230      | 4.456795 | 0         |
| ZFY          | -1.71902 | 1.14E-07  |
| DDX3Y        | -1.91034 | 7.84E-13  |
| NANP         | -2.24532 | 3.12E-19  |
| LOC103247079 | 4.118465 | 5.02E-100 |
| ZNF419       | -3.62083 | 6.78E-06  |
| NOA1         | 2.52084  | 0         |
| LOC103247132 | -2.2676  | 5.97E-14  |
| HIST2H2BE    | -1.97447 | 6.66E-14  |
| BOLA1        | -3.0202  | 5.94E-73  |
| PLEKHO1      | -1.13746 | 3.00E-53  |
| FASTKD5      | -3.26648 | 8.00E-86  |
| CIART        | -2.84323 | 1.75E-34  |
| MCL1         | -3.18731 | 0         |
| GOLPH3L      | -1.86662 | 2.26E-92  |
| C20H1orf56   | -1.125   | 1.03E-07  |

|              |          |           |
|--------------|----------|-----------|
| RPRD2        | -2.83904 | 1.09E-254 |
| BCL9         | -1.74034 | 9.97E-126 |
| CDC42SE1     | -1.29153 | 2.45E-14  |
| LOC103247288 | -1.09014 | 5.31E-19  |
| ZCCHC12      | -1.10456 | 7.00E-11  |
| NKRF         | -3.61536 | 3.95E-104 |
| RNF113A      | -3.62083 | 4.42E-20  |
| ZBTB33       | -2.29548 | 3.38E-50  |
| XIAP         | -1.25826 | 8.88E-14  |
| ATRN         | -1.04465 | 8.45E-124 |
| WDR44        | -1.62291 | 1.16E-37  |
| C2H2orf27    | 1.216136 | 8.26E-79  |
| LOC103247451 | -3.84323 | 5.20E-04  |
| PRRG1        | -1.53735 | 1.92E-35  |
| ADAM33       | 1.057238 | 9.17E-37  |
| CENPB        | -1.53672 | 6.10E-86  |
| LOC103247559 | -3.69385 | 2.14E-20  |
| PDPK1        | -1.02732 | 5.36E-23  |
| ZCCHC3       | -4.13429 | 5.21E-133 |
| LOC103247767 | -3.01859 | 7.71E-20  |
| SOX12        | -1.83634 | 1.88E-105 |
| LOC103247796 | -2.30057 | 1.12E-15  |
| LOC103247810 | -2.58019 | 1.71E-04  |
| LOC103247823 | -2.45091 | 7.42E-10  |
| LOC103247851 | -2.61353 | 2.80E-20  |
| TRIM6        | -1.12052 | 1.21E-33  |
| TRIM68       | -1.57108 | 6.05E-27  |
| TRIM21       | -2.99612 | 7.10E-61  |
| RHOG         | -1.90222 | 4.48E-117 |
| ID1          | -3.01859 | 2.13E-38  |
| RELT         | 1.080705 | 3.32E-07  |
| DNAJB13      | -1.3578  | 5.04E-06  |
| LOC103248030 | -2.89452 | 5.65E-34  |
| LIPT2        | -4.0235  | 5.61E-28  |
| POLD3        | -1.36845 | 1.69E-34  |
| RNF169       | -3.06177 | 1.35E-128 |
| LOC103248048 | -3.84323 | 5.20E-04  |
| LOC103248058 | -1.05915 | 1.24E-36  |
| EMSY         | -2.2058  | 1.27E-69  |
| LRRC32       | -3.01261 | 1.83E-296 |
| LOC103248084 | -1.63224 | 6.19E-08  |
| TSKU         | -2.8844  | 3.70E-290 |
| B3GNT6       | 4.051592 | 3.13E-08  |
| RSF1         | -2.42161 | 1.67E-238 |

|              |          |           |
|--------------|----------|-----------|
| THRSP        | -2.69192 | 2.15E-63  |
| KCTD21       | -2.47143 | 7.95E-72  |
| RAB30        | -3.70964 | 6.76E-37  |
| PCF11        | -4.31557 | 0         |
| DLG2         | -1.02738 | 1.84E-107 |
| CREBZF       | -1.44673 | 1.52E-77  |
| LOC103248163 | -2.85841 | 1.60E-21  |
| PLAGL2       | -2.08413 | 7.83E-91  |
| EED          | -1.0784  | 3.11E-28  |
| FZD4         | -1.95462 | 3.40E-28  |
| LOC103248202 | -1.8603  | 4.84E-12  |
| ASXL1        | -2.42826 | 0         |
| NOL4L        | -1.83772 | 6.50E-34  |
| MED17        | -2.014   | 2.94E-61  |
| ANKRD49      | -3.83173 | 3.09E-52  |
| FUT4         | -1.45091 | 5.37E-04  |
| KDM4D        | -1.66814 | 2.15E-11  |
| LOC103248271 | -1.62357 | 1.33E-56  |
| SESN3        | -1.41284 | 3.16E-09  |
| MAML2        | -2.1851  | 8.52E-15  |
| JRKL         | -2.92014 | 3.13E-49  |
| DNMT3B       | -1.2364  | 9.76E-38  |
| BIRC3        | -2.4986  | 0         |
| BIRC2        | -1.23868 | 3.25E-121 |
| DYNC2H1      | -1.14434 | 8.07E-52  |
| MSANTD4      | -2.6733  | 9.80E-79  |
| KBTBD3       | -1.46826 | 1.27E-12  |
| RAB39A       | -2.1455  | 4.39E-20  |
| NPAT         | -2.42582 | 1.56E-122 |
| EXPH5        | -3.74414 | 2.54E-174 |
| LOC103248413 | 5.146027 | 6.72E-04  |
| ZC3H12C      | -1.88049 | 3.09E-78  |
| BTG4         | -1.25826 | 5.96E-06  |
| TIMM8B       | -1.14373 | 2.67E-30  |
| NNMT         | -3.42819 | 4.06E-09  |
| RBM7         | -1.87131 | 1.75E-150 |
| BUD13        | -2.61099 | 1.23E-85  |
| PAFAH1B2     | -1.44328 | 9.97E-143 |
| SCN2B        | 5.470718 | 4.34E-36  |
| KMT2A        | -2.61232 | 0         |
| PHLDB1       | -1.23355 | 0         |
| E2F1         | 1.711171 | 4.22E-149 |
| DDX6         | -2.05058 | 8.13E-165 |
| BCL9L        | -2.91467 | 0         |

|              |          |           |
|--------------|----------|-----------|
| TESMIN       | -1.94567 | 1.36E-09  |
| HMBS         | 1.080137 | 3.48E-63  |
| C2CD2L       | 1.111906 | 5.21E-36  |
| HINFP        | -1.47251 | 1.07E-22  |
| CBL          | -1.196   | 1.94E-42  |
| RNF26        | -2.09994 | 9.32E-303 |
| TMEM136      | -1.00376 | 5.80E-09  |
| GRIK4        | 1.911662 | 1.24E-04  |
| TBCEL        | -1.34021 | 4.05E-14  |
| SC5D         | -1.46178 | 7.26E-241 |
| HSPA8        | 1.113784 | 0         |
| GRAMD1B      | -1.56297 | 3.51E-29  |
| ZNF202       | -2.58556 | 8.79E-40  |
| ROBO3        | 1.143835 | 6.43E-18  |
| DDX25        | -3.97447 | 2.32E-04  |
| HYLS1        | -1.92221 | 1.51E-25  |
| PUS3         | -2.99317 | 9.11E-79  |
| TP53INP2     | -1.71313 | 1.48E-61  |
| KIRREL3      | 1.43806  | 2.26E-04  |
| NCOA6        | -1.54936 | 3.36E-85  |
| KCNJ1        | -2.64731 | 5.15E-12  |
| ARHGAP32     | -1.45091 | 1.17E-49  |
| NFRKB        | -1.30545 | 4.74E-33  |
| LOC103248832 | -1.33843 | 4.91E-07  |
| ZBTB44       | -1.12032 | 3.91E-10  |
| ADAMTS15     | -2.4584  | 1.18E-18  |
| ACSS2        | -1.02533 | 8.36E-198 |
| LATS2        | -1.40304 | 3.36E-75  |
| IL17D        | 1.140738 | 3.74E-05  |
| GJB2         | -1.84323 | 8.46E-08  |
| ZMYM5        | -1.53162 | 5.69E-27  |
| RTEL1        | 1.00002  | 3.07E-53  |
| SACS         | -1.4491  | 1.23E-107 |
| TNFRSF19     | -2.17509 | 0         |
| TAF4         | -2.12607 | 3.29E-31  |
| SHISA2       | -1.1758  | 5.34E-05  |
| ZNFX1        | -1.9027  | 1.16E-72  |
| RASL11A      | -1.15662 | 3.97E-14  |
| MTIF3        | -1.0048  | 1.00E-20  |
| LNX2         | -1.30529 | 2.22E-54  |
| PAN3         | -1.16937 | 2.09E-65  |

---
